# Supplementary material for: Epigenetic reprogramming by TET enzymes impacts co-transcriptional R-loops
Source: eLife journal article supplement (doi:10.7554/elife.69476), 2022-02-22

**A**

| DNA template        | RNA concentration |
|---------------------|-------------------|
| <i>ACTB P1 C</i>    | 414,40 ng/uL      |
| <i>ACTB P1 5hmC</i> | 271,00 ng/uL      |
| <i>ACTB P1 5mC</i>  | 71,17 ng/uL       |
| <i>ACTB P2 C</i>    | 128,77 ng/uL      |
| <i>ACTB P2 5hmC</i> | 40,30 ng/uL       |
| <i>ACTB P2 5mC</i>  | 28,60 ng/uL       |
| <i>APOE C</i>       | 188,63 ng/uL      |
| <i>APOE 5hmC</i>    | 108,47 ng/uL      |
| <i>APOE 5mC</i>     | 22,23 ng/uL       |

**B**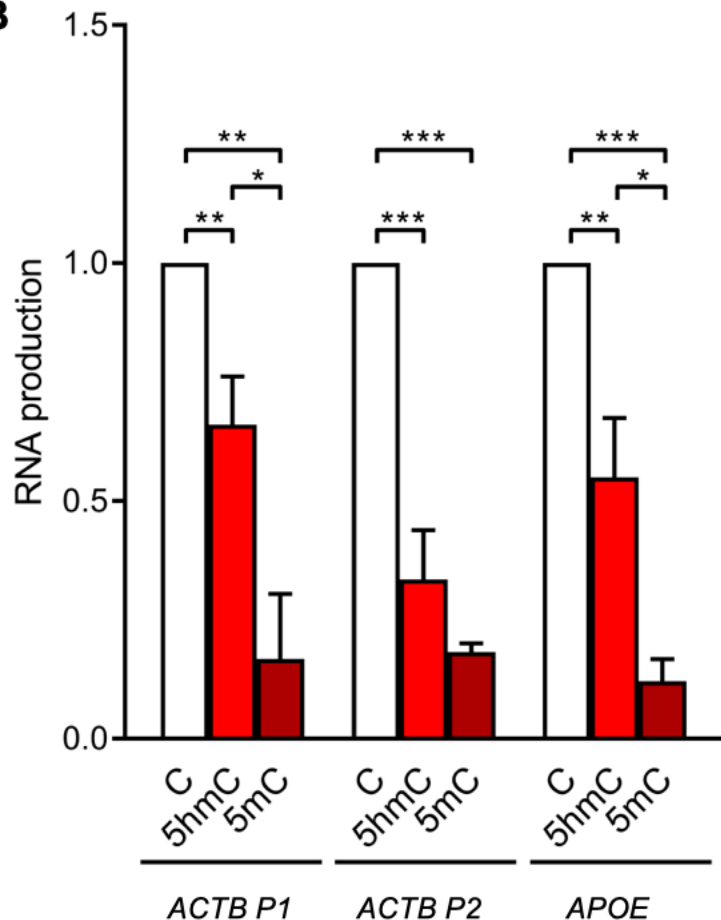

Supplement: supp [file elife-69476-supp-v1.zip]
