# Supplementary material for: Epigenetic reprogramming by TET enzymes impacts co-transcriptional R-loops
Source: eLife. 2022 Feb 22;11:e69476. doi: 10.7554/eLife.69476 (PMC8896830; doi:10.7554/eLife.69476)
Supplement: Supplementary file 1. [file elife-69476-supp1.xlsx]

## Sheet: DifferentiallyExpressedGenes_Rn
EnsemblID	geneName	length	geneType	logFC	AveExpr	t	P.Value	adj.P.Val	B
ENSMUSG00000065037	Rn7sk	144.973	misc_RNA	0.904097594930153	14.4168133604319	244.828524623398	4.45995136062158e-15	7.60626125002071e-11	25.5159675315718
ENSMUSG00000092837	Rpph1	136.472	ribozyme	1.1121317174299	13.6336657216985	219.720280027262	9.54032770780849e-15	7.60626125002071e-11	24.9165108183985
ENSMUSG00000074129	Rpl13a	819.532	protein_coding	0.647136492007954	10.8241122350146	217.793059593548	1.01496415430755e-14	7.60626125002071e-11	24.6892712853618
ENSMUSG00000032294	Pkm	2227.53	protein_coding	-0.381760455187834	10.988229520092	-217.787664095115	1.01514086901971e-14	7.60626125002071e-11	24.4993510182599
ENSMUSG00000093674	Rpl41	239.241827053938	protein_coding	0.759855630639617	10.1793400508206	189.446590796465	2.70395056339135e-14	7.89757984231312e-11	23.8896856745106
ENSMUSG00000099021	Rn7s1	123.841	misc_RNA	1.1124878731142	14.5254915788326	179.883366023414	3.89113451817123e-14	7.89757984231312e-11	23.5259473594271
ENSMUSG00000099250	Rn7s2	123.841	misc_RNA	1.1124878731142	14.5254915788326	179.883366023414	3.89113451817123e-14	7.89757984231312e-11	23.5259473594271
ENSMUSG00000007892	Rplp1	291.042	protein_coding	0.789305399090876	10.5895428586405	179.548931375826	3.94235074826772e-14	7.89757984231312e-11	23.4231186738609
ENSMUSG00000088025	Rprl3	117.603	ribozyme	1.59479844129858	9.96767524140074	182.249307937165	3.54976200307086e-14	7.89757984231312e-11	23.359103119547
ENSMUSG00000017404	Rpl19	532.79623403382	protein_coding	0.596866464382822	10.4425894303978	171.258018750851	5.49578519573158e-14	9.65615820002194e-11	23.1217775963311
ENSMUSG00000094377	Gm24407	52.1077	snRNA	0.899663249613997	10.4804885171157	170.015740668666	5.7842473160636e-14	9.65615820002194e-11	23.0867199584299
ENSMUSG00000098641	Rnu3b4	79.2021	snoRNA	1.35562214278657	9.43047469593349	183.926182007955	3.32849814681289e-14	7.89757984231312e-11	22.8329999646332
ENSMUSG00000098925	Rnu3b2	79.2021	snoRNA	1.35562214278657	9.43047469593349	183.926182007955	3.32849814681289e-14	7.89757984231312e-11	22.8329999646332
ENSMUSG00000104856	U3	79.2021	snoRNA	1.35562214278657	9.43047469593349	183.926182007955	3.32849814681289e-14	7.89757984231312e-11	22.8329999646332
ENSMUSG00000105025	U3	79.2021	snoRNA	1.35562214278657	9.43047469593349	183.926182007955	3.32849814681289e-14	7.89757984231312e-11	22.8329999646332
ENSMUSG00000020372	Gnb2l1	611.352749321859	protein_coding	0.261349538509204	11.4203094609446	187.319926602195	2.92719055276683e-14	7.89757984231312e-11	22.3078036030269
ENSMUSG00000024359	Hspa9	2470.1790940027	protein_coding	-0.785736960737148	9.87002841686576	-146.617585033297	1.63709003904879e-13	2.34251993254177e-10	22.0663273079449
ENSMUSG00000003970	Rpl8	657.532	protein_coding	0.387064363865788	10.8120784600051	154.46720073861	1.13481392463137e-13	1.79473808532885e-10	21.9704075064667
ENSMUSG00000074403	Hist2h3b	284.158	protein_coding	1.12532063342422	9.34534632843768	149.439545815336	1.43185404590434e-13	2.15128911126897e-10	21.7715061682094
ENSMUSG00000066315	Gm12918	431.535	processed_pseudogene	0.559485618260272	10.6729994166036	135.140351281829	2.902698842537e-13	3.9646907963361e-10	21.1198081500417
ENSMUSG00000025508	Rplp2	224.634405863309	protein_coding	0.793352645110087	9.59502200242213	120.296411728793	6.5738590850875e-13	8.05959933787082e-10	20.6824803419486
ENSMUSG00000091383	Hist1h2al	181.94	protein_coding	0.791950018203575	9.68115526836991	119.95768610941	6.70538065981465e-13	8.05959933787082e-10	20.6814868190433
ENSMUSG00000034994	Eef2	2893.53	protein_coding	-0.571035409590325	11.9787924349809	-174.311591292324	4.85396439318274e-14	9.11604850317175e-11	20.5532675383274
ENSMUSG00000105207	Gm42927	3636.53	processed_pseudogene	-0.624527033921879	10.3549167316343	-118.232498166394	7.42369838959675e-13	8.57979665034588e-10	20.4092278273389
ENSMUSG00000096349	Gm22513	59.7804	snRNA	2.69277939126676	9.60423839426679	122.425723223538	5.81149203048451e-13	7.59258800104474e-10	20.3365575484486
ENSMUSG00000092341	Malat1	3100.50706108638	lincRNA	-0.228712305500869	12.0790213826797	-211.058529214576	1.26564299145075e-14	7.60626125002071e-11	20.0180771862865
ENSMUSG00000100755	Rps23-ps1	223.714	processed_pseudogene	0.447427297618976	10.1032424991722	107.992025743843	1.40285708015951e-12	1.50551615720404e-09	19.8208144736792
ENSMUSG00000032216	Nedd4	3436.69252962489	protein_coding	-0.590972255618366	10.0047191705025	-99.9653423820533	2.41335264284458e-12	2.41729445216122e-09	19.3188736851504
ENSMUSG00000064387	Snora73a	75.0537	snoRNA	1.45128170925021	8.96448097118286	103.06554379693	1.94739490447890e-12	2.0178368787823e-09	19.2715355109469
ENSMUSG00000061983	Rps12	272.411	protein_coding	0.579097338724651	9.68409004728046	94.6051218654703	3.55410262278975e-12	3.14109499153556e-09	19.0001301381095
ENSMUSG00000095217	Hist1h2bn	184.481	protein_coding	1.00871212544795	10.1474062528881	96.1433811656161	3.1734564513365e-12	3.0603998771759e-09	18.9829937992484
ENSMUSG00000020368	Canx	2000.02218190741	protein_coding	-0.73258170929466	9.54316942819633	-93.8675830240781	3.75493441439694e-12	3.22377212052039e-09	18.9682457474432
ENSMUSG00000051627	Hist1h1e	543.532	protein_coding	1.15576068112882	8.95114028104195	95.3608107790621	3.36095031271605e-12	3.0603998771759e-09	18.8715235236346
ENSMUSG00000067870	Rpl31-ps8	181.94	processed_pseudogene	0.590080705776254	9.4135251258677	92.0114330996546	4.32036437991079e-12	3.45995449350959e-09	18.8279139987891
ENSMUSG00000071866	Ppia	558.326788124039	protein_coding	0.669863265217039	9.63192513607584	92.0692120912896	4.301358698067e-12	3.45995449350959e-09	18.8158987035093
ENSMUSG00000059070	Rpl18	229.86282058149	protein_coding	0.635611768158013	10.2006736379589	91.8455570155087	4.37546243646592e-12	3.45995449350959e-09	18.5390069537955
ENSMUSG00000012848	Rps5	503.976900630855	protein_coding	0.371628473574997	10.5523891040689	95.5664520154017	3.31048370304407e-12	3.0603998771759e-09	18.4924793314761
ENSMUSG00000075014	Gm10800	455.533	protein_coding	2.23965655964675	9.38355698869939	88.5626101548618	5.64988701422025e-12	4.04222511643582e-09	18.4469653483162
ENSMUSG00000026615	Eprs	2916.70145516385	protein_coding	-0.692317967803806	9.25214974103786	-86.4265057423588	6.70660770886091e-12	4.58015579644458e-09	18.3777381833769
ENSMUSG00000025362	Rps26	244.416	protein_coding	0.617925979350378	9.87549703807926	87.671427759458	6.06576263430984e-12	4.2388395674041e-09	18.3720924946608
ENSMUSG00000052146	Rps10	305.043229350053	protein_coding	0.543585123712733	9.87688511260693	86.1107869221269	6.881200969315e-12	4.58608677981958e-09	18.2301308863018
ENSMUSG00000032518	Rpsa	1656.53	protein_coding	0.3645382575683	10.2076309139087	88.6470166624361	5.61221581365464e-12	4.04222511643582e-09	18.2279611764808
ENSMUSG00000029752	Asns	748.576899592335	protein_coding	-0.470187334161798	9.69475973000134	-84.7212583697433	7.71396391307472e-12	4.93184897072303e-09	18.1909392661509
ENSMUSG00000057841	Rpl32	315.072558216783	protein_coding	0.349838338071047	10.0746786557993	85.8653260140067	7.02053285872078e-12	4.58608677981958e-09	18.0784106982908
ENSMUSG00000064358	mt-Co3	579.532	protein_coding	-0.10646069806443	11.419258419034	-109.89700498127	1.2407024591632e-12	1.38080993316278e-09	18.0713454712532
ENSMUSG00000036181	Hist1h1c	1355.53	protein_coding	0.488546373716472	9.82564183729387	83.3183172648279	8.67362996593738e-12	5.31905932339699e-09	18.0018437220393
ENSMUSG00000105827	Hist2h2bb	184.481	protein_coding	1.24414736895721	9.74272856298446	80.6604834489934	1.08909227391823e-11	6.09030249805666e-09	17.8554923980395
ENSMUSG00000063021	Hist1h2ak	194.831	protein_coding	1.25854973000361	8.69908642478272	82.646166051484	9.18126187132367e-12	5.40956348963539e-09	17.8444699155028
ENSMUSG00000081051	Gm15427	326.697	processed_pseudogene	0.600884153690952	9.61302635248321	80.6039526560916	1.09446682051003e-11	6.09030249805666e-09	17.8431988600552
ENSMUSG00000021196	Pfkp	1553.10634972158	protein_coding	-0.884507143490897	8.87125149789078	-79.3977289505079	1.2166919691169e-11	6.52863874642745e-09	17.7047845712041
ENSMUSG00000024493	Lars	3651.53	protein_coding	-0.844102659426783	9.23516176242636	-77.77232692034	1.40686257545424e-11	7.38213385153158e-09	17.6466073630284
ENSMUSG00000064288	Hist1h4k	131.699	protein_coding	1.13911616635286	10.6532150534312	83.8188247120786	8.3164151618446e-12	5.20624914996392e-09	17.5767383883505
ENSMUSG00000069682	Gm10275	315.409412544318	transcribed_processed_pseudogene	0.352289104814142	10.944096832051	90.4306060112743	4.87952929763831e-12	3.66562439661834e-09	17.5211028758857
ENSMUSG00000097971	Gm26917	3124.53	lincRNA	0.373370282154159	14.069117167588	80.9219533250008	1.06462248141575e-11	6.09030249805666e-09	17.4516820735481
ENSMUSG00000061482	Hist1h4d	194.831	protein_coding	1.03731888904336	9.69473498191728	75.4762784640022	1.73629945687564e-11	8.69567706327603e-09	17.3578363725108
ENSMUSG00000096243	Gm24265	52.1077	snRNA	1.02664629089319	10.5769095397238	79.687657479358	1.18594898079729e-11	6.47937834981417e-09	17.207339884085
ENSMUSG00000098178	Gm42418	1626.53	lincRNA	0.674886454196162	10.1021923942872	75.1920969143524	1.78289699487025e-11	8.78266750800919e-09	17.0656420732549
ENSMUSG00000044533	Rps2	730.955687107433	protein_coding	0.393673383311359	11.2461447660977	90.7438160042159	4.76247082786856e-12	3.66562439661834e-09	16.9973307501315
ENSMUSG00000065353	Snora73b	75.0537	snoRNA	1.44360199396697	8.64502824130506	71.8904554131705	2.4435767415152e-11	1.16550853183794e-08	16.9452275155319
ENSMUSG00000106106	Rn18s-rs5	671.005969384097	rRNA	0.850134546369251	11.0733953017428	82.9765189011035	8.92764647857815e-12	5.3653369806959e-09	16.8552363845343
ENSMUSG00000088185	Scarna2	213.599	scaRNA	1.22913396865332	8.21907353636125	72.746020097244	2.24883608178592e-11	1.08992379712234e-08	16.7793090111516
ENSMUSG00000069306	Hist1h4m	202.779	protein_coding	0.866006368690543	9.53041640172165	68.7814263160193	3.33271988567322e-11	1.47271911536169e-08	16.7061688161825
ENSMUSG00000040952	Rps19	226.029741388573	protein_coding	0.657505423491568	10.14900503405	71.4851982330346	2.54249552695515e-11	1.19374137639805e-08	16.6325405293731
ENSMUSG00000058773	Hist1h1b	538.532	protein_coding	0.491098111418619	9.81000293822811	69.3020615995899	3.16090559131092e-11	1.46126234020465e-08	16.6053522961695
ENSMUSG00000103234	Gm37158	5499.53	TEC	-1.04117838780605	8.38897782579535	-68.9198614891733	3.28601602137184e-11	1.47271911536169e-08	16.582032374883
ENSMUSG00000020719	Ddx5	1321.80447693123	protein_coding	-0.379392968469356	9.61910413207562	-67.9947388560026	3.61296927794382e-11	1.55094448332763e-08	16.5655687738816
ENSMUSG00000075706	Gpx4	374.215622977798	protein_coding	0.844152029008169	9.41798634067771	66.0266057943284	4.44011924300744e-11	1.85307143240459e-08	16.4359942006788
ENSMUSG00000069300	Hist1h2bj	259.782	protein_coding	1.22681122571241	8.70907976360809	65.218260832211	4.8410515151958e-11	1.96579401324485e-08	16.3689662555416
ENSMUSG00000060461	Dppa5a	414.538	protein_coding	-0.151147803819537	10.9115638950387	-77.6314524376574	1.4248852320837e-11	7.38213385153158e-09	16.3584479994435
ENSMUSG00000099517	Hist1h3g	225.572	protein_coding	0.958582691270811	8.18062187437879	65.7317444313158	4.58180545195966e-11	1.88600920583474e-08	16.2153201613542
ENSMUSG00000093064	Gm23153	132.372	misc_RNA	1.33470628718241	7.9404643692603	68.5417776687846	3.4153739304879e-11	1.48737059764103e-08	16.2063354365153
ENSMUSG00000081604	Gm11518	210.871	processed_pseudogene	0.615520936510435	8.83360760386787	62.4668865924946	6.55092814756883e-11	2.45341552583212e-08	16.109550834782
ENSMUSG00000058603	Rpl28-ps1	213.599	processed_pseudogene	0.598601493735631	8.90615533559536	62.3824247128728	6.61342000041273e-11	2.45341552583212e-08	16.1001800338022
ENSMUSG00000030662	Ipo5	4386.53	protein_coding	-0.51044705609576	9.35001445109363	-61.4462418525496	7.35368656326025e-11	2.69174304311335e-08	15.9152636811413
ENSMUSG00000080859	Rpl10-ps1	440.534	transcribed_processed_pseudogene	0.439968598509411	9.84971765422507	62.7017180979367	6.38069443184779e-11	2.42700616433664e-08	15.8034722956225
ENSMUSG00000022995	Enah	2623.0273969239	protein_coding	-0.424668807106521	9.29470038407783	-59.7628843332056	8.93611100199661e-11	3.08645056895398e-08	15.7213556300077
ENSMUSG00000060093	Hist1h4a	334.658	protein_coding	1.31933310765054	7.58726642195386	66.1361711428494	4.38875133450342e-11	1.85307143240459e-08	15.6860263389743
ENSMUSG00000003429	Rps11	397.544	protein_coding	0.521955144536808	9.50322286119174	59.9638870142637	8.72805704501877e-11	3.08552218995022e-08	15.6599164541499
ENSMUSG00000095597	Gm6472	377.559	transcribed_processed_pseudogene	0.362905601516173	9.82796640772127	61.350001749636	7.43501189984384e-11	2.69174304311335e-08	15.6437096886322
ENSMUSG00000020917	Acly	2629.3161531107	protein_coding	-0.744493416287844	8.38803794427001	-58.7668196100395	1.005447341035e-10	3.39468394952368e-08	15.6172161235588
ENSMUSG00000096010	Hist4h4	2658.53	protein_coding	1.03855280375076	8.03466813004314	60.2528139265974	8.43861146542281e-11	3.0187123324344e-08	15.6104764628884
ENSMUSG00000025980	Hspd1	1485.43736494127	protein_coding	-0.598372211528464	8.97076969817524	-58.2539582159892	1.06921597646018e-10	3.49226857354911e-08	15.6099978111326
ENSMUSG00000028234	Rps20	898.518221570637	protein_coding	0.55160944849966	9.28220188876322	58.3492499817577	1.05702597509217e-10	3.49226857354911e-08	15.5428162163284
ENSMUSG00000084416	Rpl10a-ps1	449.533	processed_pseudogene	0.269335423514818	10.1969814940844	62.8779461447589	6.25625871855994e-11	2.41018356710266e-08	15.538769787876
ENSMUSG00000016756	Cmah	9192.53	protein_coding	-0.42275425790038	9.73863290563618	-59.8430272357277	8.85248500211017e-11	3.08645056895398e-08	15.5296699433916
ENSMUSG00000064351	mt-Co1	1340.53	protein_coding	-0.438378171087514	12.8761402624017	-76.7332037008773	1.54620194531941e-11	7.87488512794964e-09	15.4431256902579
ENSMUSG00000064168	Hist1h2bh	190.483	protein_coding	1.51257048138079	9.13378513625605	56.8867283410304	1.26305415401084e-10	3.99510676567072e-08	15.4403944171154
ENSMUSG00000001270	Ckb	1273.53	protein_coding	1.05590149711374	7.87283907662743	58.8651295121169	9.93725866418362e-11	3.39323506363697e-08	15.3739419515161
ENSMUSG00000072692	Rpl37rt	122.549969958146	transcribed_processed_pseudogene	0.616930583061652	8.59527051109181	55.9032454955033	1.42741169631567e-10	4.37676470026424e-08	15.3285522410663
ENSMUSG00000031960	Aars	3178.93617971891	protein_coding	-0.493726993519635	9.4770269422276	-56.1358494074158	1.38643821183255e-10	4.29495688941817e-08	15.182122024204
ENSMUSG00000026496	Parp1	2376.88003768913	protein_coding	-0.388957400945952	9.29462163707634	-54.9926837330854	1.60167336772597e-10	4.81286830267976e-08	15.0959259980186
ENSMUSG00000082062	Ftl2-ps	347.612	processed_pseudogene	0.23632748066405	10.7621210488168	63.779112129959	5.6616980927206e-11	2.20945929854755e-08	14.9928968341905
ENSMUSG00000039001	Rps21	196.342397945118	protein_coding	0.613937668980737	8.71390213544479	53.2406643899898	2.00997716500806e-10	5.80474446329386e-08	14.9864775297011
ENSMUSG00000096807	Hist1h2bm	184.481	protein_coding	1.28934100290775	8.17419335287816	53.8074423186142	1.86611875850246e-10	5.5519804528951e-08	14.9612538590082
ENSMUSG00000060419	Rps16-ps2	238.715	processed_pseudogene	0.785935747170447	9.17189828286369	52.9657089764034	2.0843012517484e-10	5.80743430631125e-08	14.8663998759738
ENSMUSG00000024587	Nars	2427.53	protein_coding	-0.458163171190151	9.2490090855726	-52.9549701894608	2.08726714726485e-10	5.80743430631125e-08	14.8322128235367
ENSMUSG00000069310	Hist1h3c	285.14	protein_coding	0.815897531361724	8.72632172309139	51.6056755921981	2.50138197474385e-10	6.59333569816472e-08	14.765372189463
ENSMUSG00000023944	Hsp90ab1	1268.30917666983	protein_coding	-0.272586430815494	10.9956338532212	-64.2670111215221	5.36687047813546e-11	2.12196172365122e-08	14.7529424498389
ENSMUSG00000029777	Gars	2108.71855848725	protein_coding	-0.478391681668461	8.95613874887908	-51.7100560057874	2.46619170797288e-10	6.55810571972364e-08	14.7423502933084
ENSMUSG00000003660	Snrnp200	5730.39373746031	protein_coding	-0.476415455597136	8.89819191309726	-51.4091365312045	2.56921002795141e-10	6.71323409825321e-08	14.7114994713187
ENSMUSG00000026980	Ly75	5893.10241500586	protein_coding	-1.47094512434972	7.29222663487099	-57.5625724949714	1.16262849937273e-10	3.71657699762248e-08	14.6443537250009
ENSMUSG00000085328	Gm17131	3641.53	unprocessed_pseudogene	-1.00164298428698	7.72137656192477	-52.8277594259882	2.12277010228452e-10	5.8520292480319e-08	14.6430084435492
ENSMUSG00000107176	Gm9794	221.862	processed_pseudogene	0.352686019865432	9.6364522595895	53.0360167926117	2.06500174055819e-10	5.80743430631125e-08	14.6356522856866
ENSMUSG00000032449	Slc25a36	2134.24216833676	protein_coding	-0.571447882489824	8.82064054074262	-50.3424825981182	2.97606667671843e-10	7.57862945497561e-08	14.5749202150739
ENSMUSG00000100801	Gm15459	1736.53	processed_pseudogene	-0.192898357412856	11.3567208443467	-69.0261582226737	3.25066173483674e-11	1.47271911536169e-08	14.563611148955
ENSMUSG00000011179	Odc1	2342.53	protein_coding	-0.625274316040398	8.52044754976314	-50.0704423430212	3.09129671493454e-10	7.67689049479901e-08	14.5593652404736
ENSMUSG00000069272	Hist1h2ae	256.884	protein_coding	0.821967729594657	7.96268746140853	50.5240679573014	2.90188105603553e-10	7.45502865225724e-08	14.5207437436198
ENSMUSG00000031996	Aplp2	3430.15339267266	protein_coding	-0.86658104528601	7.99709494940128	-50.5219847772111	2.90272006494092e-10	7.45502865225724e-08	14.51739309038
ENSMUSG00000069274	Hist1h4f	193.086	protein_coding	1.14907681259032	8.28461852123254	48.8127057857825	3.69483321655374e-10	8.81159074001774e-08	14.3614672928429
ENSMUSG00000087935	Snora81	64.7224	snoRNA	1.47650180590877	7.04939351039434	56.560580439631	1.31503783558144e-10	4.11620540847779e-08	14.3596451173357
ENSMUSG00000078952	Lincenc1	2270.58655887652	lincRNA	-0.65228145531939	8.33608551926109	-48.6095941399604	3.80442317215818e-10	9.00150487403001e-08	14.3453850558137
ENSMUSG00000063457	Rps15	297.067766071607	protein_coding	0.649105396994312	9.08187009945318	49.0706137916659	3.56083401379208e-10	8.62899203874502e-08	14.3169308647358
ENSMUSG00000058838	Rps27a-ps2	263.655	processed_pseudogene	0.54624616551223	9.39776897121716	49.804218456733	3.20902107426393e-10	7.90392411971777e-08	14.2933870135341
ENSMUSG00000028649	Macf1	10679.2954341398	protein_coding	-0.48488360746542	8.91008281945046	-48.4965439042013	3.86702567522088e-10	9.00777166780715e-08	14.2803812066422
ENSMUSG00000058922	Gm10052	755.532	processed_pseudogene	0.788650506557324	7.97587345878614	48.5309308687851	3.84785996885588e-10	9.00777166780715e-08	14.2697960253685
ENSMUSG00000078851	Hist3h2a	1941.53	protein_coding	1.31495057963275	7.17744580151434	53.3623448244761	1.97805478785598e-10	5.77073478837712e-08	14.2611567548792
ENSMUSG00000051176	Zfp42	1595.53	protein_coding	0.201504677502815	10.5146421504397	55.7970399767628	1.44657856512509e-10	4.39073124277211e-08	14.2503639216893
ENSMUSG00000075015	Gm10801	299.921	protein_coding	2.17297592799148	7.04010982265615	57.9109092216594	1.11444854256299e-10	3.60086712424465e-08	14.2230618281696
ENSMUSG00000031818	Cox4i1	443.259588948638	protein_coding	0.576678138797062	8.68192227286168	47.6607554391949	4.36813967355764e-10	1.00144587330465e-07	14.1945196086314
ENSMUSG00000026238	Ptma	626.380012437371	protein_coding	0.365416850461802	10.3280549619722	53.6031537816959	1.91657106636657e-10	5.6461807816911e-08	14.154706725979
ENSMUSG00000062382	Gm10116	717.532	protein_coding	0.454977896565724	11.3115278530794	64.4747183634148	5.2467076914988e-11	2.10211092562463e-08	14.1482214596199
ENSMUSG00000057113	Npm1	907.992542160487	protein_coding	-0.17827798943877	10.8796710629662	-58.2815558491274	1.06566916912336e-10	3.49226857354911e-08	14.1252967518071
ENSMUSG00000104563	Gm43041	2425.53	TEC	0.348202390758972	9.65479140481429	49.6848036243837	3.26348371977608e-10	7.97271725980094e-08	14.1169126399267
ENSMUSG00000082536	Gm13456	1160.53	processed_pseudogene	-0.631950263560235	9.60695613727295	-49.0099867629353	3.59182745723406e-10	8.63446586099409e-08	14.0846748837176
ENSMUSG00000069268	Hist1h2bf	257.849	protein_coding	1.03603977503993	7.94208612253412	47.2074100267115	4.67076813055109e-10	1.04143214677855e-07	14.0709640012571
ENSMUSG00000000787	Ddx3x	2243.20833665799	protein_coding	-0.448658783828153	9.07950160377664	-47.1958350232151	4.67880261623029e-10	1.04143214677855e-07	14.0255680152093
ENSMUSG00000060591	Ifitm2	422.536	protein_coding	0.851648690728983	7.94268232142598	46.8045239065844	4.95993707125699e-10	1.08150819174503e-07	14.024317915496
ENSMUSG00000060126	Tpt1	436.790645179436	protein_coding	0.450230981034826	8.80416908706669	46.5852754183721	5.12586326286284e-10	1.10019332275547e-07	14.0020938884772
ENSMUSG00000101972	Hist1h3i	210.871	protein_coding	1.03152840811676	9.57210795566287	48.211734682821	4.03002445027725e-10	9.31524651587547e-08	14.0018360702332
ENSMUSG00000026380	Tfcp2l1	8088.04059027256	protein_coding	-0.545374642344337	8.68450579421371	-46.3112448321305	5.34223440856453e-10	1.12257903316752e-07	13.989320204606
ENSMUSG00000068739	Sars	1516.71004390831	protein_coding	-0.42524621673928	9.05689624416657	-46.6641062582274	5.06548523273677e-10	1.09505586876624e-07	13.9468933178587
ENSMUSG00000106628	Gm43558	77.1039	TEC	0.819929320659525	8.24553588025145	45.4506203315611	6.09270668255195e-10	1.24544042927894e-07	13.8778744734112
ENSMUSG00000020048	Hsp90b1	1572.29127811038	protein_coding	-0.950282319634223	8.92069915630661	-45.6702284957819	5.89035751458109e-10	1.21232433531265e-07	13.8563527501705
ENSMUSG00000064367	mt-Nd5	1619.53	protein_coding	-0.287495061129439	9.651889476847	-47.6126349598213	4.39917652088966e-10	1.00144587330465e-07	13.7967153529744
ENSMUSG00000037742	Eef1a1	579.26261150363	protein_coding	-0.401071404628313	13.8488714741737	-51.9859477354124	2.37586883611663e-10	6.43175519427646e-08	13.7736136368036
ENSMUSG00000006932	Ctnnb1	1136.88123290831	protein_coding	-0.382572838995301	9.73728748331601	-47.5189561814117	4.46032275351485e-10	1.00773111594262e-07	13.7331125938198
ENSMUSG00000106037	Gm4332	156.156	processed_pseudogene	0.331456295872679	9.4496170085311	46.4650452632731	5.21953919779595e-10	1.10452065742655e-07	13.7202406449492
ENSMUSG00000084319	Tpt1-ps3	314.776	processed_pseudogene	0.339213754064026	9.3014692917882	45.6725375518068	5.88827108070233e-10	1.21232433531265e-07	13.6667969873395
ENSMUSG00000025203	Scd2	5248.53	protein_coding	-1.02483053194662	7.37574583008795	-46.1138985902564	5.50452250171228e-10	1.14864858787467e-07	13.6605078904517
ENSMUSG00000028691	Prdx1	642.155013918855	protein_coding	0.303606556845187	9.74948082669401	46.7952565213872	4.96682520086572e-10	1.08150819174503e-07	13.5818200690408
ENSMUSG00000093834	Rnu1b2	60.1256	snRNA	2.37331451215754	7.04933524899268	50.0939645157139	3.08113451186896e-10	7.67689049479901e-08	13.5653368230299
ENSMUSG00000095580	Rnu1b1	60.1256	snRNA	2.37331451215754	7.04933524899268	50.0939645157139	3.08113451186896e-10	7.67689049479901e-08	13.5653368230299
ENSMUSG00000041028	Ghitm	2703.29425926122	protein_coding	-0.925875315760769	7.89007159772226	-43.5450942252788	8.22486309490447e-10	1.62597967854464e-07	13.5297689638469
ENSMUSG00000057863	Rpl36	204.565	protein_coding	0.50519128040553	9.14616887801704	44.355660625034	7.22794820560835e-10	1.45766856127735e-07	13.521415875919
ENSMUSG00000030695	Aldoa	1283.43578840188	protein_coding	-0.637157261944338	9.45511842084939	-44.8733308754437	6.66359517593462e-10	1.35293494217337e-07	13.4876417325805
ENSMUSG00000105285	Gm43238	166.328	TEC	-0.808183427460443	8.08536596206787	-42.9613231310873	9.04041496697629e-10	1.76399629443293e-07	13.476435832589
ENSMUSG00000047126	Cltc	3337.64349466302	protein_coding	-0.362253217892627	9.11390117333955	-43.9114171935863	7.75606724682885e-10	1.54345738211894e-07	13.4618708086411
ENSMUSG00000081406	Rps6-ps4	545.532	processed_pseudogene	0.231000517634769	10.781100939138	52.422138452731	2.24066454895241e-10	6.12088445740644e-08	13.3983822472854
ENSMUSG00000037815	Ctnna1	3493.53	protein_coding	-0.510557592623739	8.89906859290892	-42.7626944916618	9.33867850704387e-10	1.81043839005265e-07	13.3475989827567
ENSMUSG00000062997	Rpl35	295.206946982985	protein_coding	0.531204326950496	8.33983308313931	42.1175258383298	1.03878852894154e-09	1.8917913034039e-07	13.3425581655262
ENSMUSG00000028164	Manba	1313.13277124314	protein_coding	-0.854473961408491	7.85084258351197	-42.201703554915	1.02436340835476e-09	1.88313997309375e-07	13.3192768956975
ENSMUSG00000024576	Csnk1a1	1894.89410111253	protein_coding	-0.495596449549843	8.83812561980498	-42.3477787969056	9.99870602363938e-10	1.86615600810149e-07	13.2925685130744
ENSMUSG00000064702	Gm24950	69.5506	snRNA	0.97921995705213	7.4467265343981	42.5064062299373	9.74027231646015e-10	1.84078894866233e-07	13.242261843197
ENSMUSG00000065251	Gm23971	69.5506	snRNA	0.97921995705213	7.4467265343981	42.5064062299373	9.74027231646015e-10	1.84078894866233e-07	13.242261843197
ENSMUSG00000065767	Gm23849	69.5506	snRNA	0.97921995705213	7.4467265343981	42.5064062299373	9.74027231646015e-10	1.84078894866233e-07	13.242261843197
ENSMUSG00000065944	Rnu2-10	69.5506	snRNA	0.97921995705213	7.4467265343981	42.5064062299373	9.74027231646015e-10	1.84078894866233e-07	13.242261843197
ENSMUSG00000036550	Cnot1	8148.63715001801	protein_coding	-0.386001798734542	8.90367555927477	-42.1906748480378	1.02624026143448e-09	1.88313997309375e-07	13.2393048040637
ENSMUSG00000028773	Fabp3	618.532	protein_coding	0.639450744691309	8.2526436659232	41.462203197991	1.15937083176691e-09	2.03730608910901e-07	13.2369482641603
ENSMUSG00000024608	Rps14	256.529397535508	protein_coding	0.481183370546551	10.1677815547341	46.5016436562087	5.19081858362115e-10	1.10452065742655e-07	13.2006277863283
ENSMUSG00000064941	Gm23238	59.7804	snRNA	2.81890499334019	8.23340585460789	41.5038746221208	1.15124368344015e-09	2.03730608910901e-07	13.1709003421804
ENSMUSG00000055148	Klf2	1642.53	protein_coding	0.583755911209601	8.26440527938287	40.8725268107412	1.28169255798272e-09	2.21561184502262e-07	13.1344416493741
ENSMUSG00000037487	Ubr5	9585.53	protein_coding	-0.322708089967495	9.73337671111363	-44.030391329025	7.61043191800997e-10	1.52457245802854e-07	13.1327573948355
ENSMUSG00000084106	Gm6136	686.532	processed_pseudogene	0.57165930845982	9.1246526752689	41.9966555858623	1.05990896708386e-09	1.91862678023512e-07	13.1168139730119
ENSMUSG00000061615	Hist1h2ab	269.487	protein_coding	0.885451008614178	8.08135581248622	40.7076504705044	1.31848590500138e-09	2.25108994087424e-07	13.1085021572413
ENSMUSG00000063696	Gm8730	870.532	protein_coding	0.537467608948829	9.54840324401889	43.1270513598401	8.79986003996318e-10	1.72828100876375e-07	13.0939032721401
ENSMUSG00000066232	Ipo7	2912.53	protein_coding	-0.662516093597597	8.18794935616319	-40.3972175235755	1.39108329799042e-09	2.33457979905379e-07	13.056367363437
ENSMUSG00000075031	Hist1h2bb	249.193	protein_coding	0.641240116641891	8.33635489595621	40.3869190917732	1.39356874509599e-09	2.33457979905379e-07	13.0435242958756
ENSMUSG00000040850	Psme4	5493.10279935769	protein_coding	-0.579526071969539	8.3866516427466	-40.3666979737645	1.39846372201964e-09	2.33457979905379e-07	13.0365656475953
ENSMUSG00000069308	Hist1h2bp	266.107925853076	protein_coding	1.27875178526682	8.01719112685906	40.2990686818826	1.4149781089578e-09	2.34909818762834e-07	13.0297539689467
ENSMUSG00000102700	Gm38312	1541.53	TEC	-0.225690456754078	11.0265921176164	-51.7372385141132	2.45712055118444e-10	6.55810571972364e-08	12.9477522495506
ENSMUSG00000090137	Uba52	197.244503977028	protein_coding	0.5206128819576	9.36617159714337	41.2443048374438	1.20294905177718e-09	2.10159395679375e-07	12.8539506269348
ENSMUSG00000040675	Mthfd1l	3422.93127079886	protein_coding	-0.966126836187103	7.22050795813209	-40.4864287443611	1.36976338850589e-09	2.32542486221545e-07	12.8333398149881
ENSMUSG00000031010	Usp9x	3664.24356721765	protein_coding	-0.466959211830599	9.71347161692828	-42.1816960738275	1.02777115906478e-09	1.88313997309375e-07	12.8268476914346
ENSMUSG00000016559	H3f3b	920.728606670219	protein_coding	0.442147920756849	8.6420958223598	39.5208460789249	1.62195199993379e-09	2.60631206663157e-07	12.8243877201103
ENSMUSG00000064380	Gm26448	74.2466	snoRNA	1.10563387750815	6.94666142069447	41.4722184311793	1.1574116043146e-09	2.03730608910901e-07	12.8202684766985
ENSMUSG00000094338	Hist1h2bl	184.481	protein_coding	0.916679462202865	10.7339090990395	46.9848116787667	4.82808158175584e-10	1.06675752536898e-07	12.7939149959618
ENSMUSG00000068396	Rpl34-ps1	162.365	processed_pseudogene	0.379704504155065	8.93409747823359	39.8750694361332	1.52373504409315e-09	2.47495753188946e-07	12.7936940762752
ENSMUSG00000050299	Gm9843	299.921	protein_coding	0.545268620004194	9.12566521161795	40.0387598337384	1.48065454099752e-09	2.4312671203516e-07	12.7493365543851
ENSMUSG00000063954	Hist2h2aa2	323.714	protein_coding	0.83136569854123	9.16664155812054	39.9380069267058	1.50700381982512e-09	2.46108466206115e-07	12.730920745482
ENSMUSG00000069008	Gm5537	1047.53	processed_pseudogene	-0.948431348567068	7.68760708446047	-38.8011697447061	1.84461582737452e-09	2.88691984358213e-07	12.730833057703
ENSMUSG00000104608	AL590614.1	53.0838	miRNA	1.0400006736849	8.04378236240459	38.5310159479758	1.93706181743793e-09	2.96973319143838e-07	12.7255514439495
ENSMUSG00000022710	Usp7	3117.36788868218	protein_coding	-0.434190820745608	9.09069899115474	-39.6549101995418	1.58395303207091e-09	2.55893573444618e-07	12.6976400778724
ENSMUSG00000105388	Rpl36a-ps2	137.861	processed_pseudogene	0.579906132288133	8.1592210455238	38.3407964703718	2.00533042298273e-09	3.02804893870392e-07	12.6864065708931
ENSMUSG00000027397	Slc20a1	1732.50796000946	protein_coding	-0.910472605076078	7.18643176045191	-39.4724967641593	1.63591062880674e-09	2.61475949388371e-07	12.6727462916711
ENSMUSG00000077714	Snord17	89.5249	snoRNA	1.25851138661474	6.71998057018791	41.6554441654209	1.12222690469396e-09	2.00724977733028e-07	12.6612540478624
ENSMUSG00000058186	Gm13242	2725.33415077761	protein_coding	-0.804476791989051	8.25723290304129	-38.1486886772362	2.07707904174456e-09	3.12070740626911e-07	12.6479027046323
ENSMUSG00000031311	Nono	1019.62470874341	protein_coding	-0.427771661184224	8.68424345249178	-38.5587607277964	1.92732783156724e-09	2.96973319143838e-07	12.6345000045102
ENSMUSG00000024120	Lrpprc	2091.37635983788	protein_coding	-0.660172928671532	8.07151519215715	-37.9342881765192	2.16063797105585e-09	3.21410942535928e-07	12.6164556295786
ENSMUSG00000091405	Hist2h4	1425.53	protein_coding	1.0718945199371	7.84323626717599	37.6766781242737	2.26615959452559e-09	3.32174778809265e-07	12.5598551890507
ENSMUSG00000029767	Calu	2235.4587835224	protein_coding	-0.734420657593064	7.57345490199183	-37.81030133865	2.21070843930369e-09	3.27239299963727e-07	12.5454203454876
ENSMUSG00000033161	Atp1a1	3470.15437527679	protein_coding	-0.567077441005933	8.14743954883416	-37.4039279614223	2.38434763986181e-09	3.47802243835958e-07	12.512722091799
ENSMUSG00000064339	mt-Rnr2	1377.53	Mt_rRNA	0.267958397218743	9.36575000490271	39.1901163250955	1.72022753808968e-09	2.72058512063456e-07	12.4455091221317
ENSMUSG00000032244	Fem1b	6283.53	protein_coding	-0.529648656091854	8.1978514771377	-37.074398235013	2.53663979670535e-09	3.64705690197125e-07	12.4445644042197
ENSMUSG00000066652	Lefty2	2259.41873052573	protein_coding	-1.58177277180972	7.10836900500118	-38.377575835848	1.99191905513386e-09	3.02298867109683e-07	12.3954690177055
ENSMUSG00000069267	Hist1h3b	415.538	protein_coding	1.06905468276159	7.75945807029171	36.7860519418908	2.67906047526928e-09	3.76703370176563e-07	12.3891816027535
ENSMUSG00000100210	Hist1h3f	643.532	protein_coding	1.11374901313528	7.45950010320022	37.0449142213167	2.55079874256832e-09	3.64995006740169e-07	12.3797339866084
ENSMUSG00000015837	Sqstm1	1133.56538829673	protein_coding	0.604694991210788	8.18622032139332	36.7170860933066	2.71446340712544e-09	3.77624587595891e-07	12.3744267241459
ENSMUSG00000032555	Topbp1	2053.89670772334	protein_coding	-0.495581774242836	8.24021721432529	-36.5543350150783	2.80014781052957e-09	3.85970832837628e-07	12.3372065663181
ENSMUSG00000035885	Cox8a	340.635	protein_coding	0.912428495384678	7.52546122132941	36.5721431589704	2.79062337607048e-09	3.85970832837628e-07	12.3188926037822
ENSMUSG00000034667	Xpot	5787.53	protein_coding	-0.758894013657545	8.05284427374752	-36.2354381810622	2.97714911930835e-09	4.0663797220953e-07	12.2945629674745
ENSMUSG00000028179	Cth	1558.96666187887	protein_coding	-1.40912413732166	6.82870811060855	-38.4164480361441	1.97785573163854e-09	3.01688258274145e-07	12.2636654189605
ENSMUSG00000008668	Rps18	333.019706667249	protein_coding	0.346010188346835	10.3831543363602	42.3913782189078	9.92690245317474e-10	1.86433432384655e-07	12.227491704201
ENSMUSG00000022040	Ephx2	1830.53	protein_coding	-1.59766674093513	6.64035965248714	-39.4257909410772	1.64952515684231e-09	2.62257044645263e-07	12.2268418040047
ENSMUSG00000060860	Ube2s	392.3252496603	protein_coding	0.602710148664467	8.67830176175852	36.4959218706073	2.8316507580306e-09	3.88530929808501e-07	12.2227455134601
ENSMUSG00000025967	Eef1b2	349.272272969996	protein_coding	0.340483986588501	9.64269360234729	38.7371463854788	1.86606040973736e-09	2.90534970218643e-07	12.1772886021391
ENSMUSG00000005892	Trh	1179.53	protein_coding	0.362374870099666	9.37865318422882	37.7144763504045	2.25031459624086e-09	3.31469133835498e-07	12.1423026545345
ENSMUSG00000021218	Gdi2	2476.53	protein_coding	-0.497219681509094	8.17440253584651	-35.3058285968548	3.57062253195599e-09	4.74750603817458e-07	12.0945924720809
ENSMUSG00000035242	Oaz1	402.647593712645	protein_coding	1.04073570872881	8.65720824947494	35.699964336942	3.30388660683538e-09	4.45195016362315e-07	12.085104995085
ENSMUSG00000052565	Hist1h1d	539.532	protein_coding	0.537277578217017	10.1307212544818	40.147842232486	1.4527180947712e-09	2.39850143020768e-07	12.0786354153192
ENSMUSG00000070605	Gm13251	4345.53	protein_coding	-1.12462013467445	6.85153734790232	-36.754278500825	2.695305154513e-09	3.76703370176563e-07	12.0706357171387
ENSMUSG00000029922	Mkrn1	955.211133980149	protein_coding	0.215225848037138	9.57873109422335	37.9889715088251	2.13896716721311e-09	3.19770270684511e-07	12.0645165232292
ENSMUSG00000021953	Tdh	1075.4485712459	protein_coding	0.294074098097472	9.26474121386799	37.0088509270784	2.56824005518187e-09	3.6574903041782e-07	12.0592372866477
ENSMUSG00000022797	Tfrc	3366.07827706749	protein_coding	-0.585994182005954	7.8890117354483	-34.9991991707835	3.79520490830703e-09	5.00184703025079e-07	12.0540890219393
ENSMUSG00000020176	Grb10	2138.43116693874	protein_coding	-1.77128130188589	6.22674442768547	-40.8667606414459	1.2829593698091e-09	2.21561184502262e-07	11.9632461983959
ENSMUSG00000025001	Hells	1271.83345813864	protein_coding	-0.479600135784237	8.31587162811019	-34.7599434615171	3.9816750556866e-09	5.1794525432176e-07	11.9571352931702
ENSMUSG00000070493	Chchd2	720.528881483578	protein_coding	0.731590163525697	7.91740125546417	34.4404391847324	4.24722772627572e-09	5.47746549128151e-07	11.9397428303384
ENSMUSG00000056201	Cfl1	943.532	protein_coding	0.331343895056227	9.04907427830707	35.858971813666	3.2027724560912e-09	4.35475608746988e-07	11.9291671530723
ENSMUSG00000022912	Pros1	2621.55706447384	protein_coding	-1.7460440218432	6.1980803920496	-40.7475246742332	1.30947834850634e-09	2.24848656538669e-07	11.9279211617559
ENSMUSG00000022474	Pmm1	563.356867214525	protein_coding	0.6840511553658	7.72567582250858	34.0697344960685	4.58102881734321e-09	5.7118396237488e-07	11.865611655854
ENSMUSG00000001435	Col18a1	4846.79889233074	protein_coding	-1.02586157612001	7.44219344236366	-34.1575873478473	4.4992932728848e-09	5.68461180240579e-07	11.8438008354895
ENSMUSG00000094655	Gm25360	69.5506	snRNA	0.671023500895833	7.8318702783104	33.924633684376	4.71976608958417e-09	5.86050624900474e-07	11.8359999755638
ENSMUSG00000023150	Ivns1abp	3239.50344089394	protein_coding	-0.805678536868425	7.35081244883175	-34.1541736142589	4.50243804776391e-09	5.68461180240579e-07	11.833168277926
ENSMUSG00000046434	Hnrnpa1	1616.32567621117	protein_coding	0.700747131883359	7.88615664313301	33.1813799928478	5.51016190827987e-09	6.70457799556229e-07	11.6773863787106
ENSMUSG00000022462	Slc38a2	4421.53	protein_coding	-0.517442859309861	8.49732861193769	-33.6393886414327	5.0067205681683e-09	6.19123236020121e-07	11.6711820399111
ENSMUSG00000024217	Snrpc	697.33324236375	protein_coding	0.927320721335048	6.76186808679575	34.2170625362647	4.4449043460632e-09	5.65953096164632e-07	11.6501198802315
ENSMUSG00000071655	Ubxn1	835.079226316454	protein_coding	0.742907039571232	7.33824284087037	33.1803592907758	5.51134662314777e-09	6.70457799556229e-07	11.6482158195854
ENSMUSG00000004207	Psap	2407.13546614107	protein_coding	-0.640559823969347	7.69216126264216	-33.0138673028656	5.70854216831345e-09	6.88237335868438e-07	11.646165845314
ENSMUSG00000049422	Chchd10	734.532	protein_coding	0.453212766674151	8.85024924305942	34.0889579233813	4.56300006797460e-09	5.7118396237488e-07	11.6349822378612
ENSMUSG00000069273	Hist1h3e	631.532	protein_coding	0.816042530494744	7.88350123329257	32.9739284372153	5.75703630934772e-09	6.89215872747369e-07	11.6338757330331
ENSMUSG00000061991	Hist1h2af	200.113	protein_coding	1.12165680946842	7.99826074771141	32.8602868286659	5.89761402450631e-09	7.03243665961866e-07	11.6046467418383
ENSMUSG00000043716	Rpl7	552.122892517802	protein_coding	0.280188993223272	10.7685048774173	41.728482960137	1.10854296833423e-09	1.99464716499852e-07	11.6009600838922
ENSMUSG00000043483	Gm6863	437.534	processed_pseudogene	0.276445202723199	9.0552223054589	34.2186375900764	4.44347422443316e-09	5.65953096164632e-07	11.5634048203133
ENSMUSG00000060639	Hist1h4i	522.532	protein_coding	1.22220036391135	6.34196889258865	35.4257721757869	3.48693078757229e-09	4.66314941285002e-07	11.5625381198536
ENSMUSG00000038615	Nfe2l1	1822.42689870327	protein_coding	-0.78019919018365	7.08917638674823	-32.7110328853056	6.08823780652369e-09	7.202577080639e-07	11.4936253846689
ENSMUSG00000026234	Ncl	2777.33142227708	protein_coding	-0.295658053381652	10.4043375097048	-38.5461713206385	1.93173776482884e-09	2.96973319143838e-07	11.4739888818904
ENSMUSG00000101355	Hist1h3h	210.871	protein_coding	1.45226483457452	9.69739287262518	34.8086654642962	3.94286941237732e-09	5.17376781539415e-07	11.4693087960933
ENSMUSG00000022884	Eif4a2	774.820414615348	protein_coding	-0.141604691669086	10.0571043752277	-36.8091036623897	2.66734486692940e-09	3.76703370176563e-07	11.4375857298299
ENSMUSG00000054717	Hmgb2	2487.53	protein_coding	0.540631632329647	7.78745528579054	32.0125251907241	7.07923315183688e-09	8.0577226128616e-07	11.427822401352
ENSMUSG00000026478	Lamc1	4181.19783973021	protein_coding	-0.945717470376943	7.18430934720963	-32.1829989432948	6.82138639960987e-09	7.88368615084143e-07	11.4066033976847
ENSMUSG00000061787	Rps17	286.577213404538	protein_coding	0.462914503393041	9.34655952037244	34.1037920622243	4.54914318152301e-09	5.7118396237488e-07	11.3819922341909
ENSMUSG00000024640	Psat1	1274.82245860335	protein_coding	-0.439924112470262	9.0965891545575	-33.399374393027	5.26367137759786e-09	6.45583923369135e-07	11.3731063424227
ENSMUSG00000028478	Clta	871.408622708296	protein_coding	0.638504853639224	7.52481404767229	31.6496428014334	7.66603551398702e-09	8.56344613976936e-07	11.3501876201703
ENSMUSG00000049932	H2afx	1179.53	protein_coding	0.681305715155554	8.36575555158909	32.0442570103498	7.0304065718572e-09	8.0577226128616e-07	11.3427759670935
ENSMUSG00000005397	Nid1	5841.53	protein_coding	-1.54315467880169	5.91987291896315	-37.2776464046384	2.44144052169742e-09	3.52705991521567e-07	11.3231555368391
ENSMUSG00000006398	Cdc20	1277.95421387997	protein_coding	0.555028523011185	7.69285531019109	31.4661410665245	7.9837861348476e-09	8.88536257651983e-07	11.3104829145237
ENSMUSG00000025794	Rpl14	730.532	protein_coding	0.456527183409786	9.5572899396458	34.2455997552786	4.41907431492578e-09	5.65953096164632e-07	11.2771056439326
ENSMUSG00000081344	Gm14303	62.221	processed_pseudogene	1.10450703734934	7.33928805855588	31.3030478301627	8.27886453330698e-09	9.179763850972e-07	11.2540600716529
ENSMUSG00000034024	Cct2	1757.53	protein_coding	-0.27750646387635	9.20161679724964	-33.1613932451159	5.53341323471479e-09	6.70457799556229e-07	11.250367295273
ENSMUSG00000024827	Gldc	3549.53	protein_coding	-0.562669677591206	8.7197088772967	-32.0635735868612	7.00087190362295e-09	8.0577226128616e-07	11.2362425265586
ENSMUSG00000019505	Ubb	925.150296134053	protein_coding	0.294873401880576	9.18087654196264	32.9994789291246	5.72595873297313e-09	6.88237335868438e-07	11.2153465967509
ENSMUSG00000018286	Psmb6	590.545625187954	protein_coding	0.550397701658153	7.71665409854508	30.9942615609671	8.87230090004818e-09	9.65955687483869e-07	11.202760203746
ENSMUSG00000003873	Bax	664.532	protein_coding	0.722580244830973	7.36701862604291	31.0200995618191	8.82082471032224e-09	9.63843497165357e-07	11.2019812394162
ENSMUSG00000037851	Iars	1596.63284960913	protein_coding	-0.357447764714246	8.68196693094558	-31.839746774512	7.35198058481678e-09	8.30525054861502e-07	11.1868687797147
ENSMUSG00000056537	Rlim	6813.23738719904	protein_coding	0.443350659151383	8.22095934021868	31.223394485482	8.42748987094727e-09	9.31020746809171e-07	11.1806713259845
ENSMUSG00000041133	Smc1a	2580.2351788734	protein_coding	-0.561631744585235	7.76127743520474	-30.5559336466266	9.80000846038041e-09	1.0378997024114e-06	11.1003483085985
ENSMUSG00000063171	Rps4l	624.092759469549	transcribed_processed_pseudogene	0.525457964010893	7.9901449834151	30.5981836380017	9.70592324848832e-09	1.0378997024114e-06	11.0799318570158
ENSMUSG00000004880	Lbr	1541.05809797975	protein_coding	-0.508987475982424	7.8319674580475	-30.3912469884359	1.01768147907017e-08	1.06181634599234e-06	11.0549033863413
ENSMUSG00000021670	Hmgcr	1763.59790638263	protein_coding	-0.751302340334052	7.04288937088007	-30.5517290113833	9.80942844969343e-09	1.0378997024114e-06	11.0466759153974
ENSMUSG00000036781	Rps27l	294.513988093917	protein_coding	0.62105385610448	7.43722753186476	30.2937935766678	1.04075680131517e-08	1.07838590933387e-06	11.0453709286285
ENSMUSG00000023830	Igf2r	7574.56641886648	protein_coding	-0.695116863138503	7.55463941127408	-30.2789294781953	1.04432859534812e-08	1.07838590933387e-06	11.0437566650551
ENSMUSG00000020290	Xpo1	2505.38254411598	protein_coding	-0.361860550720566	8.66043638472073	-31.1530187610702	8.5613422268342e-09	9.42343489282567e-07	11.0293237480336
ENSMUSG00000028412	Slc44a1	1749.41131383531	protein_coding	-0.738150382641341	7.07574151351205	-30.4033960043428	1.01484594535006e-08	1.06181634599234e-06	11.0223427208456
ENSMUSG00000047676	Rpsa-ps10	680.532	processed_pseudogene	0.190522979151361	10.4369325581124	36.773661104825	2.68538215708574e-09	3.76703370176563e-07	11.0218054717794
ENSMUSG00000106001	Gm42826	2434.53	TEC	-0.691892447264964	8.3864277430623	-30.5946889357061	9.71366626277597e-09	1.0378997024114e-06	11.0004732347031
ENSMUSG00000049539	Hist1h1a	437.534	protein_coding	0.284040462605786	10.2754905357202	35.825869106544	3.22352816756013e-09	4.3632341399556e-07	11.000298264866
ENSMUSG00000020277	Pfkl	2268.04570713039	protein_coding	-0.899792138188337	7.17587611399406	-30.1768035492787	1.06925086028453e-08	1.1003396952291e-06	10.9868766369149
ENSMUSG00000029247	Paics	1309.17070408562	protein_coding	-0.40520024783924	9.14063957367127	-31.8598380879997	7.31965604996961e-09	8.29993753379384e-07	10.9812687791759
ENSMUSG00000005610	Eif4g2	866.80248603558	protein_coding	-0.305262725217773	9.27924737688691	-32.0204606498596	7.06698645788111e-09	8.0577226128616e-07	10.934281814504
ENSMUSG00000009575	Cbx5	5159.90678084682	protein_coding	-0.416821671948988	8.53990557953152	-30.5638019396832	9.78240820222471e-09	1.0378997024114e-06	10.9310863593437
ENSMUSG00000069266	Hist1h4b	198.345	protein_coding	1.04057249978992	6.79193442211789	30.3065723203161	1.03769725373805e-08	1.07838590933387e-06	10.9260330864442
ENSMUSG00000015932	Dstn	1706.53	protein_coding	-0.44334214233992	8.15950610025964	-30.0774895948557	1.09413994207882e-08	1.12210959452309e-06	10.9228197856355
ENSMUSG00000101249	Gm29216	288.089	unprocessed_pseudogene	-0.435548750276453	9.59368432321972	-32.7240653255941	6.07131571390976e-09	7.202577080639e-07	10.9118827013212
ENSMUSG00000070167	Snora57	54.3952	snoRNA	1.70118892072472	5.70977696396792	35.4189086641339	3.49165901657711e-09	4.66314941285002e-07	10.9062608039764
ENSMUSG00000024740	Ddb1	3950.53	protein_coding	-0.183683173367655	9.88698510282785	-33.5547121739258	5.0957017052389e-09	6.27544018609524e-07	10.8583358152885
ENSMUSG00000061331	Gm17132	953.532	unprocessed_pseudogene	-0.889727273645581	7.48575012215607	-29.3465900843405	1.2990769678154e-08	1.29258158297632e-06	10.8255291250997
ENSMUSG00000020064	Herc4	3814.53	protein_coding	-0.710988301171668	7.24730705771799	-29.3797338559931	1.28888544764961e-08	1.28670162180808e-06	10.8213098428995
ENSMUSG00000004951	Hspb1	698.799169312645	protein_coding	0.413996901354835	8.22759501551796	29.660377031961	1.20615304058769e-08	1.22045182427647e-06	10.7964876872844
ENSMUSG00000071650	Ganab	3657.53	protein_coding	-0.501889213344078	7.7861239822792	-29.245699502073	1.33067089298825e-08	1.3153068968225e-06	10.7836083223332
ENSMUSG00000062933	Gm10123	286.123	processed_pseudogene	0.22944179062066	9.71741576633786	32.669291144165	6.14280121950454e-09	7.23862877823106e-07	10.7753388547771
ENSMUSG00000025130	P4hb	1772.33422354233	protein_coding	-0.527112982842425	7.8807009807462	-29.1707985702931	1.35469374205033e-08	1.33466204114329e-06	10.753067429806
ENSMUSG00000060678	Hist1h4c	196.584	protein_coding	1.17679854458749	6.43701785726564	30.0024361989776	1.11338811728773e-08	1.1341084588603e-06	10.7198859430128
ENSMUSG00000067274	Rplp0	748.28029648134	protein_coding	0.219079849475371	10.3707452413282	35.0229549141064	3.77724064233616e-09	5.00010150050922e-07	10.7114271616799
ENSMUSG00000089542	Gm25835	53.0838	snoRNA	1.29660738192229	6.19697158784638	30.6353987191741	9.62390335093217e-09	1.03651853688946e-06	10.697437272715
ENSMUSG00000041697	Cox6a1	367.439224785601	protein_coding	0.820478910617886	7.50806140409342	28.6127615457795	1.55010173376495e-08	1.4977172668136e-06	10.6486546640085
ENSMUSG00000057036	Gm7536	241.561	processed_pseudogene	0.411112883303403	9.62003969684727	31.796760873883	7.4216885356553e-09	8.34016653278874e-07	10.6449259656502
ENSMUSG00000022956	Atp5o	455.651346676158	protein_coding	0.587210202284125	7.64187799085033	28.6308625860445	1.54327898367663e-08	1.49593516711287e-06	10.6443452358887
ENSMUSG00000065876	Gm25682	59.7804	snRNA	3.6799001702066	5.50170729856667	53.1716369353777	2.02834759441531e-10	5.80474446329386e-08	10.6258258001284
ENSMUSG00000060143	Gm10076	187.04	protein_coding	2.26912785592225	5.69368110495039	34.6031306476043	4.10956362169179e-09	5.32277057190589e-07	10.6244631009081
ENSMUSG00000030096	Slc6a6	2708.1971041288	protein_coding	-0.637384898674426	7.24850821467218	-28.5293709175238	1.58198171960402e-08	1.52212741134443e-06	10.6232571637218
ENSMUSG00000097312	Gm26870	955.337198677529	lincRNA	2.62338427670369	5.47630230813165	39.1165685200106	1.74299567514562e-09	2.742161101699e-07	10.6119494186989
ENSMUSG00000006740	Kif5b	3329.42466355054	protein_coding	-0.439488043755927	8.08274654954872	-28.6648643752924	1.53055527001672e-08	1.488403084425e-06	10.5842853141502
ENSMUSG00000051234	Rnf7	489.395689313289	protein_coding	0.824059354534231	6.72988092493169	28.6962615965389	1.51891241961442e-08	1.48187660055174e-06	10.5753636665052
ENSMUSG00000065145	Vaultrc5	52.7578	misc_RNA	1.11626924281694	6.09986410610237	30.0451257056282	1.10239302023116e-08	1.12672815867095e-06	10.5537347223493
ENSMUSG00000064796	Terc	221.862	misc_RNA	1.19740587630305	6.31079558845488	29.273968108546	1.32173100085333e-08	1.31078200807399e-06	10.5171140939456
ENSMUSG00000017754	Pltp	971.16434572325	protein_coding	-0.878394038453962	6.74474723432522	-28.4074202990137	1.6299596883113e-08	1.55487805314496e-06	10.5057565252111
ENSMUSG00000083992	Gm11478	394.546	processed_pseudogene	0.537257303720745	8.98589906983285	29.6599400742632	1.20627705351297e-08	1.22045182427647e-06	10.5024176690293
ENSMUSG00000026235	Epha4	2730.73560631792	protein_coding	-0.708950321507663	7.11593830390567	-28.010786340769	1.79788025065329e-08	1.68535684367291e-06	10.4871194772159
ENSMUSG00000083365	Gm12895	83.9963	processed_pseudogene	1.63989229157469	5.64594599751679	32.3151915200583	6.62880822326512e-09	7.69069723169473e-07	10.4751214824505
ENSMUSG00000083558	Gm12896	83.9963	processed_pseudogene	1.63989229157469	5.64594599751679	32.3151915200583	6.62880822326512e-09	7.69069723169473e-07	10.4751214824505
ENSMUSG00000086841	2410006H16Rik	258.815	processed_transcript	0.788009010027151	6.76574389470853	28.1918126877804	1.71890566056483e-08	1.62425774195951e-06	10.4730312087808
ENSMUSG00000005981	Trap1	1088.10613406508	protein_coding	-0.597546273894377	7.64477463641275	-27.8793290862634	1.85782792924282e-08	1.72835515312128e-06	10.4562525657145
ENSMUSG00000068823	Csde1	2781.51474830955	protein_coding	-0.356487612320342	8.99665252933402	-29.4887018053897	1.25601597647712e-08	1.2580674692387e-06	10.4538340580893
ENSMUSG00000038393	Txnip	1151.06142887766	protein_coding	0.23510640070837	9.51846751646864	30.7345895059587	9.40912896658406e-09	1.01703207308232e-06	10.4426209932288
ENSMUSG00000080848	Gm9385	268.513	processed_pseudogene	0.363878886850101	8.67447288362747	28.8844999483357	1.45119235050985e-08	1.42506140328335e-06	10.4381485811984
ENSMUSG00000063229	Ldha	1153.36641500526	protein_coding	-0.439139210559953	8.0653878664703	-28.0243662974398	1.79181425395192e-08	1.68535684367291e-06	10.4209094029681
ENSMUSG00000069744	Psmb3	565.76721995503	protein_coding	0.566108657294341	7.37864436525852	27.6677101377592	1.95918738118237e-08	1.80035540113606e-06	10.4156033453604
ENSMUSG00000035726	Supt16	4286.53	protein_coding	-0.359879545485802	8.69934005196731	-28.6970945555136	1.51860491741263e-08	1.48187660055174e-06	10.3852817560073
ENSMUSG00000026558	Uck2	1647.73315354764	protein_coding	-0.384303577347067	8.20041144258421	-28.0051804036836	1.80039118379648e-08	1.68535684367291e-06	10.3791705742933
ENSMUSG00000030541	Idh2	633.105625043321	protein_coding	-0.662148290532218	7.38146276309901	-27.4957493576714	2.04621461887475e-08	1.84644754001703e-06	10.3724763749823
ENSMUSG00000074877	Gm10780	114.589	pseudogene	-1.30167269652512	5.79199722998824	-30.5282553343937	9.86220873615671e-09	1.03982284320271e-06	10.3688846272506
ENSMUSG00000065087	Snord22	47.3033	snoRNA	0.765903208062563	6.90557535893551	27.612312899083	1.98675356341108e-08	1.81458838379755e-06	10.3666985224468
ENSMUSG00000057322	Rpl38	159.247062378626	protein_coding	0.710036780373943	7.01348867355007	27.5124761701213	2.03755846971842e-08	1.84644754001703e-06	10.3584815681086
ENSMUSG00000038900	Rpl12	689.207957649818	protein_coding	0.95966843004396	7.6909372507154	27.413633044477	2.08932331472772e-08	1.87970288276207e-06	10.3329955057596
ENSMUSG00000031139	Mcf2	3999.30843886962	protein_coding	-1.26885301835563	5.75059457943199	-30.4534942893436	1.00324806412168e-08	1.05407696079694e-06	10.3294856065077
ENSMUSG00000097095	Gm26547	1303.53	lincRNA	-0.445455870644851	8.20078246674563	-27.7943385756758	1.89779935685151e-08	1.75467608843172e-06	10.324454556812
ENSMUSG00000084708	Gm22988	53.0838	snoRNA	0.950169258274125	6.45529541439874	27.890718693999	1.85254469807661e-08	1.72835515312128e-06	10.3090642008532
ENSMUSG00000032252	Glce	3191.40177813843	protein_coding	-1.22855641404325	5.89826509336781	-29.5712393226075	1.23175520646354e-08	1.23789338458271e-06	10.3026589211408
ENSMUSG00000031762	Mt2	351.602	protein_coding	0.855587784062766	6.49338775554372	27.6704646189946	1.95782815816524e-08	1.80035540113606e-06	10.2779376456919
ENSMUSG00000020630	Rnaseh1	1252.53	protein_coding	2.79260658388909	5.38372731974878	37.3385867459434	2.41369632724874e-09	3.5038241998791e-07	10.2568964392314
ENSMUSG00000000628	Hk2	5084.64324444533	protein_coding	-1.20183908401374	6.14206128592692	-28.415407400811	1.62676705436817e-08	1.55487805314496e-06	10.2440819499401
ENSMUSG00000067455	Hist1h4j	569.532	protein_coding	1.35795871801751	5.7773080513788	29.5847528106473	1.22783426598746e-08	1.23789338458271e-06	10.2296971242526
ENSMUSG00000037563	Rps16	430.15688022478	protein_coding	0.955866348764176	6.42639085769912	27.5241707699384	2.0315313163603e-08	1.84644754001703e-06	10.2188567065318
ENSMUSG00000069265	Hist1h3a	329.681	protein_coding	1.08546567043641	6.67378757775749	27.2069997773505	2.20246182589513e-08	1.95226476124846e-06	10.2152799033887
ENSMUSG00000047751	Utf1	1022.53	protein_coding	0.883388896177039	6.61976375240789	27.2162395174607	2.19725585881579e-08	1.95226476124846e-06	10.2107471813884
ENSMUSG00000043770	Gm12481	121.94	processed_pseudogene	0.788374601085054	6.70033049868865	27.09174354166	2.2685979678878e-08	1.98743732761109e-06	10.2036919009201
ENSMUSG00000000486	Sept1	446.080887099681	protein_coding	-0.506998370575508	7.58466148249684	-26.8688773574561	2.40301538919406e-08	2.06864320902673e-06	10.1966380275418
ENSMUSG00000031229	Atrx	2096.09805958258	protein_coding	-0.381651869576734	8.22409620343284	-27.3160579416062	2.14190108075916e-08	1.92074314879203e-06	10.1852525182963
ENSMUSG00000025809	Itgb1	2588.35499042182	protein_coding	-0.957175936842008	6.48832524140424	-27.2825557179913	2.16030053295668e-08	1.92625729124081e-06	10.1751503851662
ENSMUSG00000027111	Itga6	3165.87996290638	protein_coding	-0.603667483063431	7.17947491459036	-26.718641241897	2.49875618039921e-08	2.12148241620923e-06	10.1715274761564
ENSMUSG00000004268	Emg1	524.940804649079	protein_coding	0.753336469146378	7.10937838520849	26.635544098877	2.55357724816727e-08	2.15540569466793e-06	10.147408541661
ENSMUSG00000088789	Scarna13	108.769	scaRNA	1.16757509015684	6.74961131404124	26.8585171620814	2.40948159059988e-08	2.06864320902673e-06	10.1471687130106
ENSMUSG00000033826	Dnah8	14378.5	protein_coding	-0.809842762699348	6.76518703539364	-26.7439043084323	2.48235665976145e-08	2.11910043378329e-06	10.127494447275
ENSMUSG00000022652	Morc1	2845.53	protein_coding	-0.714854376931172	7.0170534582141	-26.4612267685183	2.67309753465396e-08	2.2312196616338e-06	10.0946775643437
ENSMUSG00000099583	Hist1h3d	355.592	protein_coding	0.772879081439856	8.23531744730207	26.8660138122636	2.40480065701952e-08	2.06864320902673e-06	10.0634998774773
ENSMUSG00000031700	Gpt2	2172.47448592152	protein_coding	-1.13661699694412	6.61544896945039	-26.6562773237619	2.53977167511793e-08	2.14979152297518e-06	10.0594162405058
ENSMUSG00000058793	Cds2	1325.8262771651	protein_coding	-0.658145384435291	7.34494636098665	-26.2673925183481	2.81356105410622e-08	2.34195834113124e-06	10.0534010278032
ENSMUSG00000035202	Lars2	3676.53	protein_coding	-0.973479093957887	6.25188506596027	-27.1125632641398	2.25648532900236e-08	1.98743732761109e-06	10.0490832275965
ENSMUSG00000059291	Rpl11	259.339517703246	protein_coding	0.602293869756289	8.00140365437479	26.5454730264241	2.61455515998384e-08	2.19927930442332e-06	10.0327852164356
ENSMUSG00000026483	Fam129a	3498.06757843264	protein_coding	-1.19846145933733	5.75830705413619	-28.5202942839099	1.58549662135448e-08	1.52212741134443e-06	10.0266779544747
ENSMUSG00000063882	Uqcrh	342.479492064185	protein_coding	1.06681468040755	6.08538966585202	27.3054193173503	2.14772437683159e-08	1.92074314879203e-06	10.0235589919487
ENSMUSG00000020407	Upp1	589.444172255223	protein_coding	0.719598455959827	7.51559437397407	26.1517883517339	2.90133731420727e-08	2.38855575218121e-06	10.0098080008129
ENSMUSG00000025823	Pdia4	1281.32634859127	protein_coding	-0.79953068721767	7.09634912059602	-25.9756819187247	3.04112581295509e-08	2.46314796640128e-06	9.97369187270306
ENSMUSG00000105270	Gm42863	2753.53	TEC	-0.589424984535547	8.56117788600851	-26.9248129672653	2.36844399944647e-08	2.05099059767628e-06	9.96678384765382
ENSMUSG00000025491	Ifitm1	379.357211967042	protein_coding	0.55692375731256	7.91465261879338	26.232505321702	2.83972700274324e-08	2.35720874876883e-06	9.96443100097169
ENSMUSG00000025403	Shmt2	2100.53	protein_coding	-0.688382922141469	7.11799701626516	-25.9173074635198	3.0891460510344e-08	2.48862599698479e-06	9.95991256622947
ENSMUSG00000022193	Psmb5	666.532	protein_coding	0.856911983262694	6.48387224161165	26.1839435801771	2.87661262815301e-08	2.37470694679588e-06	9.93302960132873
ENSMUSG00000020250	Txnrd1	3212.53	protein_coding	-0.463716843404258	7.92291966908525	-26.0768510623677	2.95990458143851e-08	2.41690686868603e-06	9.92125944523865
ENSMUSG00000014956	Ppp1cb	859.405351246362	protein_coding	-0.537270840978238	8.06689038478673	-26.0838037703021	2.95441428853848e-08	2.41690686868603e-06	9.88959830458028
ENSMUSG00000039323	Igfbp2	1091.84414097762	protein_coding	-0.555465268742984	7.33389602547073	-25.6588896502329	3.31238731285824e-08	2.60111430045339e-06	9.8883778802186
ENSMUSG00000020571	Pdia6	1570.25198337814	protein_coding	-0.4934945478844	7.60797229596635	-25.5834566071294	3.38098347999283e-08	2.63199928990426e-06	9.84034290034023
ENSMUSG00000020923	Ubtf	2658.3424709861	protein_coding	-0.499778667942765	8.05983451292985	-25.8953364050437	3.10744362385124e-08	2.49667308698144e-06	9.83598722789257
ENSMUSG00000029202	Pds5a	2921.61356299231	protein_coding	-0.490957905015874	8.34352279331473	-26.1884372955924	2.87317651929895e-08	2.37470694679588e-06	9.83218022035173
ENSMUSG00000068220	Lgals1	595.532	protein_coding	1.44095991147446	6.35782010799319	25.9793096349353	3.03816978935451e-08	2.46314796640128e-06	9.8168784015543
ENSMUSG00000025290	Rps24	307.41788705813	protein_coding	0.24737511446305	10.3383110571174	31.1343628065979	8.59723101989944e-09	9.42840127434154e-07	9.81364866230736
ENSMUSG00000026356	Dars	1963.58963390733	protein_coding	-0.487296839207361	7.6187305355598	-25.4543779115559	3.50215747547408e-08	2.71227654588971e-06	9.80201929606003
ENSMUSG00000043411	Usp48	1634.55771395434	protein_coding	-0.413225903736432	8.03243547772896	-25.7317317623097	3.24765040050073e-08	2.57489833468724e-06	9.79346086249326
ENSMUSG00000064382	Gm26447	48.2561	snoRNA	1.50443145881413	5.51923371667442	28.2793896378908	1.68212523806356e-08	1.59956269868898e-06	9.79010952606346
ENSMUSG00000069270	Hist1h2ac	272.411	protein_coding	1.20989901809229	7.20247435973505	25.2530064967918	3.70122726236606e-08	2.78742300769017e-06	9.78144418290971
ENSMUSG00000018770	Atp5g3	517.070950278872	protein_coding	0.822233539307789	7.40777310387804	25.2771954115365	3.67664532219754e-08	2.77586721825914e-06	9.77778592293578
ENSMUSG00000056895	Hist3h2ba	409.539	protein_coding	2.07336940500577	4.9587172796822	34.7624503439999	3.97966779036727e-09	5.1794525432176e-07	9.77611258987665
ENSMUSG00000042406	Atf4	1519.53	protein_coding	0.262905860611594	8.94491380606977	26.8304389122965	2.42710637433816e-08	2.07783816075463e-06	9.73530012388817
ENSMUSG00000106512	Gm43078	61.168	TEC	0.461667989933356	7.812764452661	25.3584369349388	3.5954367993595e-08	2.77189587670309e-06	9.73495020057979
ENSMUSG00000061518	Cox5b	168.862550696704	protein_coding	0.804305733060545	6.94905529566577	25.0598507010664	3.90439130767132e-08	2.92576195521734e-06	9.72262269509787
ENSMUSG00000031765	Mt1	335.654	protein_coding	0.845087675824937	6.29851321006752	25.4774132565635	3.48017421576953e-08	2.70221589172244e-06	9.71037425807646
ENSMUSG00000062070	Pgk1	1586.89512317937	protein_coding	-0.446798709313917	8.58696536913368	-26.0922901573294	2.94772864686151e-08	2.41690686868603e-06	9.70766104459125
ENSMUSG00000060981	Hist1h4h	269.487	protein_coding	1.12229131697521	7.81186114845561	25.1803615383476	3.77618729760364e-08	2.8367663026423e-06	9.70103663563884
ENSMUSG00000043535	Setx	4916.53874418283	protein_coding	-0.327835333979062	8.83895841548784	-26.4734076519825	2.6645413089969e-08	2.23027303047487e-06	9.69684224437724
ENSMUSG00000095865	Gm13237	430.535	processed_pseudogene	0.573709213806972	7.94525182436973	25.3007010103392	3.65293609495965e-08	2.77189587670309e-06	9.68901968542048
ENSMUSG00000020142	Slc1a4	3676.68738543508	protein_coding	-0.996108871729983	6.19747178014197	-25.5854038708458	3.37919245141691e-08	2.63199928990426e-06	9.68371318513887
ENSMUSG00000041841	Rpl37	662.532	protein_coding	1.00054496394901	6.03861413829552	25.7609115745593	3.2221233236399e-08	2.56141755957818e-06	9.67332977371722
ENSMUSG00000027993	Trim2	3598.40213503231	protein_coding	-1.37658714858256	5.64144803385812	-26.9954813943567	2.32557536532519e-08	2.02046083231507e-06	9.6416574170631
ENSMUSG00000052997	Uba2	1002.97914568844	protein_coding	-0.417147694249474	8.71813923249304	-26.0442280004059	2.98582174653313e-08	2.43146226725133e-06	9.6337351614331
ENSMUSG00000055762	Eef1d	520.113420408966	protein_coding	0.678444949827505	8.13849142698673	25.2783777729302	3.67544853291936e-08	2.77586721825914e-06	9.63101023706196
ENSMUSG00000062825	Actg1	717.435769033989	protein_coding	0.221251316713658	9.44889528436628	27.5055311163371	2.04114746195409e-08	1.84644754001703e-06	9.61838680377253
ENSMUSG00000032803	Cdv3	2629.31004524231	protein_coding	-0.459834333710021	8.2296887501109	-25.3041296764039	3.64949232519885e-08	2.77189587670309e-06	9.60945109606817
ENSMUSG00000028367	Txn1	846.532	protein_coding	0.519160114693292	7.45826208979883	24.7152738313243	4.29925227986363e-08	3.16364091344327e-06	9.60836765425766
ENSMUSG00000002416	Ndufb2	500.797133410156	protein_coding	1.88410355993589	4.9359309879901	32.3945218978221	6.51622175827988e-09	7.62363774157525e-07	9.60388489446954
ENSMUSG00000078497	Gm13145	1045.53	protein_coding	-0.806293360760857	6.70415996396643	-24.7009786837085	4.31659214786429e-08	3.16364091344327e-06	9.59856741117023
ENSMUSG00000080921	Rpl38-ps2	78.357	processed_pseudogene	0.395858164982904	8.29179770530711	25.3205698160151	3.63303113938009e-08	2.77189587670309e-06	9.58429458608372
ENSMUSG00000038708	Golga4	7330.53	protein_coding	-0.516238131029374	7.43879704197577	-24.5921753362901	4.45121566204394e-08	3.23860967139851e-06	9.57712041880953
ENSMUSG00000040651	Fam208a	7369.53	protein_coding	-0.492958323588033	7.69705371507258	-24.7195786830057	4.29404611674048e-08	3.16364091344327e-06	9.57526043769251
ENSMUSG00000059040	Eno1b	1552.53	protein_coding	-0.195816131676041	9.39157345589481	-27.1895517740467	2.21233102393611e-08	1.95524514524283e-06	9.57479509565891
ENSMUSG00000055839	Tceb2	303.877	protein_coding	0.689220253395749	7.34226189515815	24.540574552212	4.51673199324285e-08	3.26257883809986e-06	9.57119588705548
ENSMUSG00000024360	Etf1	3504.53	protein_coding	-0.360289641610473	8.65788390431764	-25.7088762038568	3.26780610293496e-08	2.58406067334454e-06	9.55836671060113
ENSMUSG00000041313	Slc7a1	4901.24587346608	protein_coding	-0.853475396019216	6.77619797266515	-24.490528294315	4.58132745063643e-08	3.30130236364926e-06	9.55006012715944
ENSMUSG00000058385	Hist1h2bg	273.387	protein_coding	0.619994489980064	9.41762602993935	27.0923858631906	2.26822316633728e-08	1.98743732761109e-06	9.54660861675905
ENSMUSG00000027630	Tbl1xr1	1550.13282932019	protein_coding	-0.652898090583904	6.92718294023594	-24.33815477232	4.7845823250016e-08	3.40691740009415e-06	9.52209119693281
ENSMUSG00000030447	Cyfip1	2225.64418829736	protein_coding	-0.666030455345412	6.87774218791026	-24.3221794650457	4.80648173306196e-08	3.41051513662649e-06	9.51483830174569
ENSMUSG00000020267	Hint1	431.25873620834	protein_coding	0.559373277712024	7.30125907488974	24.3122102346312	4.82020577730088e-08	3.41051513662649e-06	9.50706188481495
ENSMUSG00000093798	Gm8355	551.532	processed_pseudogene	0.738146246785117	8.78647324430169	25.6556051328034	3.31534086682967e-08	2.60111430045339e-06	9.49231347921162
ENSMUSG00000022816	Fstl1	1381.40097241061	protein_coding	-0.877929201097786	6.3016521933211	-24.6141113813823	4.42369287710578e-08	3.22639677825611e-06	9.48889388433234
ENSMUSG00000091957	Rps2-ps10	680.392688310483	transcribed_processed_pseudogene	1.9118076431321	8.15681105323108	24.5410851853009	4.51607828765146e-08	3.26257883809986e-06	9.48165134897217
ENSMUSG00000047215	Rpl9	292.591249200856	protein_coding	0.401077571643738	9.91062932011063	28.2221458714877	1.70606346766658e-08	1.61720823785215e-06	9.46863674198503
ENSMUSG00000058064	Gm10036	332.667	protein_coding	0.751535005093525	7.81323913215362	24.4278462773665	4.66372396422527e-08	3.34463583295955e-06	9.46478951848691
ENSMUSG00000068039	Tcp1	1035.85271219105	protein_coding	-0.224906938421791	9.35440119619123	-26.7178572010636	2.49926711483932e-08	2.12148241620923e-06	9.46401954442947
ENSMUSG00000090841	Myl6	460.533	protein_coding	0.58362868797783	7.0694801846374	24.1192820537232	5.09480637382633e-08	3.54383881312748e-06	9.46246749548422
ENSMUSG00000041881	Ndufa7	226.290714257282	protein_coding	0.539881990326948	7.28621828982731	24.1491437651262	5.05115874307713e-08	3.52163037287065e-06	9.46027809273346
ENSMUSG00000014769	Psmb1	831.532	protein_coding	0.525092814690007	7.58744094916217	24.2416332315667	4.91865345909093e-08	3.45328546243512e-06	9.44910755715659
ENSMUSG00000025613	Cct8	701.722275966205	protein_coding	-0.265827712092261	8.92656479986734	-25.7860195165181	3.20034152064802e-08	2.55085046031704e-06	9.44439011892128
ENSMUSG00000025982	Sf3b1	3029.23209469269	protein_coding	-0.32833282042213	8.71678433987984	-25.3381734387312	3.61549882371685e-08	2.77189587670309e-06	9.4174388288938
ENSMUSG00000026355	Mcm6	2401.17918098345	protein_coding	-0.261045202173403	8.71750229320729	-25.3112629932303	3.64233944791511e-08	2.77189587670309e-06	9.40577076361873
ENSMUSG00000021701	Plk2	2597.53	protein_coding	1.42229290093074	5.26323154813075	26.9939998924599	2.32646493387804e-08	2.02046083231507e-06	9.37603980498224
ENSMUSG00000032481	Smarcc1	3514.84315909246	protein_coding	-0.442941073696579	7.62703276830769	-24.0122642295407	5.25480213541942e-08	3.62992067510846e-06	9.37470995158703
ENSMUSG00000078503	Gm13225	2321.08814257042	protein_coding	-0.504787823142417	7.52999545196123	-23.9052874509887	5.42049020684876e-08	3.73578693177978e-06	9.35990791271464
ENSMUSG00000020914	Top2a	3327.46707961233	protein_coding	-0.381330052967263	9.67879388848106	-27.0688659927988	2.28199346162574e-08	1.99336109094163e-06	9.34905463503468
ENSMUSG00000062727	Hist1h2bk	272.411	protein_coding	0.730225989712207	7.55908346250363	23.8133827021712	5.56760569529964e-08	3.81965715840317e-06	9.32745213074652
ENSMUSG00000035960	Apex1	845.935766967742	protein_coding	0.525378009931004	7.38131902238856	23.5128149596864	6.08152041349148e-08	4.10502212559087e-06	9.25873233198877
ENSMUSG00000086583	Gm15500	737.97787900423	transcribed_processed_pseudogene	0.155883425614709	10.9622249636189	32.3916448424241	6.52026656322953e-09	7.62363774157525e-07	9.25585908334611
ENSMUSG00000103880	Gm37009	167.931	processed_pseudogene	2.07764925101843	5.58396231758818	25.6102174823573	3.35646423935459e-08	2.62652067521787e-06	9.24905415274915
ENSMUSG00000031696	Vps35	2975.53	protein_coding	-0.379918664026081	8.01425666633384	-23.8782985418535	5.46322742277942e-08	3.75662519055146e-06	9.23769344076283
ENSMUSG00000002477	Snrpd1	632.532	protein_coding	0.709071386693584	6.46635293135702	23.4511521177281	6.19352333469755e-08	4.16351639114825e-06	9.22824551816095
ENSMUSG00000095891	Gm10717	470.29731281785	protein_coding	2.17430812611501	4.84471270266712	30.9057788966825	9.05119744159482e-09	9.81875205496328e-07	9.21516866163772
ENSMUSG00000026193	Fn1	2616.56996130074	protein_coding	-0.466095690594411	8.28018606779525	-24.0450076331822	5.20524876652025e-08	3.6122983876482e-06	9.20522195762679
ENSMUSG00000030357	Fkbp4	1637.54980067575	protein_coding	-0.210295579514137	9.13724397088543	-25.3517647166424	3.60202862015292e-08	2.77189587670309e-06	9.18955058221101
ENSMUSG00000053565	Eif3k	568.532	protein_coding	0.471961771671121	7.6430736336368	23.4059175663044	6.27718317048284e-08	4.2103365421839e-06	9.18062131465962
ENSMUSG00000020402	Vdac1	1141.76192414577	protein_coding	-0.536279739488914	8.00690516382883	-23.6329771146275	5.86983346313518e-08	4.00869603940339e-06	9.16757805641389
ENSMUSG00000103475	Gm37697	1639.53	TEC	-0.302862118037954	8.3634209696596	-24.016186740153	5.24883758640984e-08	3.62992067510846e-06	9.15792967245358
ENSMUSG00000013701	Timm23	599.685764183141	protein_coding	0.665004701734994	6.94741157946133	22.9799965802729	7.13143817103969e-08	4.71533395028168e-06	9.12745255336605
ENSMUSG00000006649	Nphs1	2107.7175201479	protein_coding	-0.910539900163931	6.0206215842733	-23.5225867952878	6.06398400511845e-08	4.10397872454514e-06	9.12298417656184
ENSMUSG00000065254	Gm23973	137.861	misc_RNA	1.58160608332321	4.92642292025058	27.6325422709438	1.9766362545696e-08	1.81085191504762e-06	9.11766021557733
ENSMUSG00000009073	Nf2	3239.25006140432	protein_coding	-0.480586105188896	7.39335012413983	-23.0501134953909	6.98210328697399e-08	4.63146184702608e-06	9.11563651797343
ENSMUSG00000087968	Gm25395	107.077	scaRNA	1.0605155489118	5.94594542305003	23.526351809438	6.05724275880013e-08	4.10397872454514e-06	9.10127028073928
ENSMUSG00000027248	Pdia3	1226.9481702446	protein_coding	-0.654384976513104	6.99475733077554	-22.8927315359857	7.32241035201827e-08	4.81468509119906e-06	9.10060188972298
ENSMUSG00000095186	Gm10718	476.532	protein_coding	1.60374959503337	5.19298429244083	25.9230063759814	3.08442007614449e-08	2.48862599698479e-06	9.09729304951439
ENSMUSG00000006333	Rps9	469.471076166347	protein_coding	0.356729772645275	9.78836080267775	26.5372656408996	2.62019365364421e-08	2.19927930442332e-06	9.08275889184118
ENSMUSG00000021395	Spin1	4229.53	protein_coding	-0.591991711355807	7.14480829334997	-22.8572648134165	7.4016883945417e-08	4.84560641759441e-06	9.08266707119543
ENSMUSG00000027447	Cst3	380.396680865979	protein_coding	0.731868504151	6.3969974606795	22.937704750946	7.22327154515056e-08	4.75991418114538e-06	9.0725278385483
ENSMUSG00000058355	Abce1	3608.53	protein_coding	-0.29024815572591	8.67102114137584	-24.1589167616279	5.03696672160881e-08	3.51990262831682e-06	9.06939704635391
ENSMUSG00000049313	Sorl1	4613.98074262115	protein_coding	-0.724001164081728	6.54147892303384	-22.8193379141234	7.48755082997102e-08	4.8911611932565e-06	9.05591345266014
ENSMUSG00000031320	Rps4x	762.860399530492	protein_coding	0.179162763963557	10.9921423237485	31.7865244727649	7.43839938363135e-09	8.34016653278874e-07	9.05377436534514
ENSMUSG00000006057	Atp5g1	472.236204749109	protein_coding	0.924125493109647	6.17048015468831	23.0574308767263	6.96672533189087e-08	4.63146184702608e-06	9.05369905890827
ENSMUSG00000047246	Hist1h2be	2203.22144356928	protein_coding	0.795400805513314	6.32981733169333	22.8648216001615	7.38471512272835e-08	4.84505032145992e-06	9.03891835322385
ENSMUSG00000026131	Dst	12270.0444408346	protein_coding	-0.291305866444386	8.99365321420977	-24.5686498117526	4.48095006855172e-08	3.25236880700267e-06	9.03280405076248
ENSMUSG00000088529	Gm26083	70.3165	scaRNA	0.887677847900244	5.91496068282909	23.2656056414753	6.54500195221387e-08	4.37046141471277e-06	9.03221923120974
ENSMUSG00000036309	Skp1a	616.004592023889	protein_coding	0.381176125538291	8.40633032738636	23.6036234747659	5.92075852248229e-08	4.03430550662291e-06	9.00387840666613
ENSMUSG00000096255	Dynlt1b	563.532	protein_coding	0.702597864810884	6.79832364980476	22.5478408061993	8.13645796917342e-08	5.24661857329811e-06	8.99540073069631
ENSMUSG00000026187	Xrcc5	2350.53	protein_coding	-0.552570101967783	7.14111971072152	-22.5672736819356	8.08793630974334e-08	5.22654619723608e-06	8.99209876087356
ENSMUSG00000024121	Atp6v0c	790.888223739437	protein_coding	0.693696619009785	6.64820816734066	22.5024494354422	8.25109399350573e-08	5.2978017822832e-06	8.97501034112374
ENSMUSG00000020361	Hspa4	2865.05425348122	protein_coding	-0.210868226315142	9.36995214562797	-24.9745617507137	3.99812744949225e-08	2.98855054054211e-06	8.92330877158742
ENSMUSG00000057262	Gm10020	410.539	protein_coding	0.373899153895321	8.9792965229576	24.1733804348893	5.01604644939304e-08	3.51345407360866e-06	8.90808280704122
ENSMUSG00000032409	Atr	6322.42491490988	protein_coding	-0.576137256180114	6.95334005209459	-22.2431538920342	8.94235877448998e-08	5.69007001455226e-06	8.90048462321895
ENSMUSG00000019970	Sgk1	867.002948780274	protein_coding	-0.436520981445182	7.6042546456068	-22.4111171668905	8.48738132869564e-08	5.43789598179052e-06	8.87212723330485
ENSMUSG00000036751	Cox6b1	300.91	protein_coding	0.639347034259838	6.83564233753932	22.0813143998093	9.40723854265332e-08	5.90142194088078e-06	8.85156146524383
ENSMUSG00000045294	Insig1	2303.32365774026	protein_coding	-0.934436999319531	5.93164044077608	-22.5293696143012	8.18288640108411e-08	5.26525810420078e-06	8.83243313323404
ENSMUSG00000097906	Gm9625	750.532	processed_pseudogene	0.275893060061106	9.23115235486009	24.4159519170091	4.67954942835111e-08	3.34799478029816e-06	8.83078586282065
ENSMUSG00000033295	Ptprf	6354.13627380384	protein_coding	-0.51570869159711	7.09497076731035	-21.9934961531272	9.67099787749408e-08	6.05424615043374e-06	8.8125970887631
ENSMUSG00000000171	Sdhd	1082.53	protein_coding	0.820791852778389	6.06312045247361	22.1543735198369	9.19404778088306e-08	5.81625140563695e-06	8.78009323164716
ENSMUSG00000024406	Pou5f1	586.210464730228	protein_coding	0.233363462114459	9.33782846475461	24.4609905356939	4.61994660251218e-08	3.3211668770069e-06	8.77375137563164
ENSMUSG00000036817	Sun1	1511.7197671628	protein_coding	-0.451413660931968	7.39301786774674	-21.9416835800635	9.83056746540568e-08	6.14134556690178e-06	8.75761647196293
ENSMUSG00000030536	Iqgap1	3682.33124192137	protein_coding	-0.415219044287728	7.64578156292198	-22.0941337502399	9.36942647515309e-08	5.89200001580491e-06	8.75720655209784
ENSMUSG00000048612	Myof	6889.53	protein_coding	-0.9074668180496	5.90913535674867	-22.238013858098	8.95671442272029e-08	5.69007001455226e-06	8.74782194676584
ENSMUSG00000069972	Rps13-ps2	250.152	processed_pseudogene	0.370672711394885	8.66885672535411	23.1733247819952	6.72824542033586e-08	4.48286134447167e-06	8.7436291513344
ENSMUSG00000095547	Gm10719	473.442178263307	protein_coding	2.3134013611479	5.50446526020052	23.5065199955574	6.09284790846127e-08	4.10502212559087e-06	8.72125196584485
ENSMUSG00000082082	Gm13230	1370.53	transcribed_unprocessed_pseudogene	-1.58761298444781	4.85063546350807	-25.8668827215779	3.13132400754198e-08	2.50915080273677e-06	8.71977047872406
ENSMUSG00000090467	Gm4613	109.339	processed_pseudogene	0.941328421417372	6.60410764932703	21.6144557074711	1.0910554263737e-07	6.70452443908041e-06	8.69839045093864
ENSMUSG00000062981	Mrpl42	461.533	protein_coding	0.73107564870785	6.50418701120976	21.5694699917422	1.10693518982178e-07	6.78822357529685e-06	8.67925618736477
ENSMUSG00000050966	Lin28a	2528.84427761287	protein_coding	-0.474719274913745	7.71806777534197	-21.9072689597348	9.93821524550353e-08	6.19571431352978e-06	8.67819254852425
ENSMUSG00000039985	Fam60a	1057.71041233868	protein_coding	-0.440008214605523	8.5732688391545	-22.7658676917466	7.61053860047323e-08	4.96071744914577e-06	8.66432424600385
ENSMUSG00000104329	Gm37324	4299.53	TEC	-1.32522656218245	5.17604111886811	-23.5848721986814	5.95355351467207e-08	4.04747351951088e-06	8.65230046527297
ENSMUSG00000036372	Tmem258	269.05710685022	protein_coding	1.06329407009293	5.38455563523778	22.6625511595147	7.85476403717932e-08	5.10882693838098e-06	8.63535110910404
ENSMUSG00000038793	Lefty1	1355.38966249065	protein_coding	-0.735041790244295	6.40136244783961	-21.4665440800035	1.1442689869941e-07	6.9322860464084e-06	8.63507772909614
ENSMUSG00000060743	H3f3a	434.044308926643	protein_coding	0.338376918371287	8.55113734221349	22.6530093239571	7.87776694180495e-08	5.11272178907769e-06	8.62342414826507
ENSMUSG00000021546	Hnrnpk	658.256640059796	protein_coding	-0.17076275643873	9.5540014119258	-24.4038569999431	4.69570458472193e-08	3.35157308946103e-06	8.6082264206261
ENSMUSG00000070319	Eif3g	870.532	protein_coding	0.501328248778261	7.42808023312544	21.4312066679804	1.15741632820795e-07	6.98377575227324e-06	8.57685937572398
ENSMUSG00000021913	Ogdhl	3244.53	protein_coding	-0.668650291086523	6.95446983767908	-21.1873307336563	1.25299438751934e-07	7.44095421948e-06	8.55960918749984
ENSMUSG00000024501	Dpysl3	2411.97361265918	protein_coding	-0.925646763672733	5.63825764211647	-21.8800954914583	1.00241632646603e-07	6.23635780413617e-06	8.55293230128787
ENSMUSG00000034892	Rps29	192.670686580303	protein_coding	0.590425404423478	6.93233862006018	21.1478874045223	1.26928359420414e-07	7.50801234689765e-06	8.5459081455244
ENSMUSG00000021806	Nid2	4679.53	protein_coding	-0.3685397498409	7.89834566306816	-21.6734809299473	1.07061228755311e-07	6.59238291571383e-06	8.54425586075275
ENSMUSG00000036202	Rif1	5707.63331870559	protein_coding	-0.284298131860721	9.59052976887896	-24.2624376684736	4.88939697212903e-08	3.44078430012893e-06	8.54398392082011
ENSMUSG00000030842	Lamtor1	914.532	protein_coding	0.77821168182852	6.07355271387668	21.318232816006	1.20061855537024e-07	7.20107524357692e-06	8.54107185942747
ENSMUSG00000022351	Sqle	2591.03831292408	protein_coding	-0.888316874698395	5.88923091734571	-21.4911073375917	1.13523050952305e-07	6.90537278960692e-06	8.53509242405208
ENSMUSG00000069309	Hist1h2an	194.831	protein_coding	1.72139352055574	5.93545355012447	21.4965876929951	1.13322504310211e-07	6.90537278960692e-06	8.51387765798563
ENSMUSG00000029455	Aldh2	880.664630644043	protein_coding	-0.507166404062541	7.01763699631976	-21.042971890596	1.31379977592966e-07	7.66570280910882e-06	8.50511766627023
ENSMUSG00000040010	Slc7a5	2836.65124189121	protein_coding	-0.477236844629793	7.23450232785735	-21.1037591038274	1.28779450008979e-07	7.60254163717057e-06	8.50023477061178
ENSMUSG00000041220	Elovl6	3952.15253872276	protein_coding	-0.456611135613733	7.35059593861705	-21.1521861350286	1.26749664127558e-07	7.50801234689765e-06	8.4979374810393
ENSMUSG00000052253	Zfp622	2598.53	protein_coding	0.731650319348296	6.37909517578104	20.9749695322453	1.34360413313941e-07	7.78057701434283e-06	8.48163236575332
ENSMUSG00000019889	Ptprk	5972.53	protein_coding	-0.68217480094369	6.34040386071855	-20.9650272623345	1.34802594740888e-07	7.78977532570952e-06	8.47269439320005
ENSMUSG00000021282	Eif5	2440.26823247914	protein_coding	-0.569515468193464	7.02978938375458	-20.9434402528765	1.35768399512527e-07	7.80058247983159e-06	8.47089239075596
ENSMUSG00000089255	Snora78	47.9381	snoRNA	1.73118907887715	4.83647113054893	24.3096884663693	4.82368442565895e-08	3.41051513662649e-06	8.46557460473244
ENSMUSG00000001056	Nhp2	688.701133795321	protein_coding	0.645749114752655	7.17109784137251	20.9744272700012	1.34384487684912e-07	7.78057701434283e-06	8.46399928072077
ENSMUSG00000018293	Pfn1	607.035511444445	protein_coding	0.55087081550291	7.46923950184727	21.0815714104424	1.29721795570406e-07	7.64315732371593e-06	8.44843681373488
ENSMUSG00000021665	Hexb	1699.53	protein_coding	-0.561296932591612	6.76716968424727	-20.828625261165	1.41039720324619e-07	7.98136074582766e-06	8.44726886014495
ENSMUSG00000027433	Xrn2	1610.18245661499	protein_coding	-0.627027790294237	7.73036153048622	-21.2184083220922	1.24032783692856e-07	7.38031904393393e-06	8.4420305679711
ENSMUSG00000028397	Kdm4c	3799.00682592152	protein_coding	-0.699044441715058	6.32351312935504	-20.8634319946113	1.39417433355498e-07	7.91938460283432e-06	8.43843766646657
ENSMUSG00000042747	Krtcap2	394.574342463123	protein_coding	1.55562358917999	4.68397320938663	24.7321331501963	4.27890413250619e-08	3.16364091344327e-06	8.42925495460493
ENSMUSG00000000278	Scpep1	1892.53	protein_coding	-0.611386276435045	6.82339795779845	-20.7697919180645	1.43831037942852e-07	8.09796671323854e-06	8.42598570593284
ENSMUSG00000062683	Atp5g2	315.805492104955	protein_coding	0.776920630844301	6.5989706985225	20.7613819344281	1.44235168125615e-07	8.10116367664784e-06	8.42501168609931
ENSMUSG00000032178	Ilf3	3278.04364791243	protein_coding	-0.399208540819826	7.5997079257525	-21.0665727299101	1.30363266958955e-07	7.65094884540947e-06	8.41494109359948
ENSMUSG00000036940	Kdm1a	2102.75878035877	protein_coding	-0.347009132222537	7.92406063415807	-21.2986530542274	1.20829154280814e-07	7.2182808289944e-06	8.40428854124017
ENSMUSG00000030609	Aen	981.223329487745	protein_coding	0.493069396475382	7.12278227719208	20.7681724968005	1.43908756526652e-07	8.09796671323854e-06	8.39758973712056
ENSMUSG00000021614	Vcan	3948.71880637369	protein_coding	-0.788754760727997	5.94569895758082	-20.9464040998296	1.356353305973e-07	7.80058247983159e-06	8.39540039151021
ENSMUSG00000028763	Hspg2	10779.4743631416	protein_coding	0.571194017949272	6.66965249224091	20.6699632986061	1.48712727764174e-07	8.30348436732988e-06	8.39538395015476
ENSMUSG00000060938	Rpl26	321.979117922106	protein_coding	0.257145446837384	9.932851802135	24.7013098512455	4.31618954334846e-08	3.16364091344327e-06	8.38571190620946
ENSMUSG00000027404	Snrpb	958.649303851078	protein_coding	0.583187560513393	8.04186210058487	21.3338241757164	1.19454828261011e-07	7.17899626883022e-06	8.3779637375107
ENSMUSG00000039682	Lap3	795.631778611535	protein_coding	-0.291865364416473	8.22342120456165	-21.5174737584309	1.12561900365715e-07	6.88741437068031e-06	8.37361500890302
ENSMUSG00000059796	Eif4a1	759.48719717024	protein_coding	0.333139501323915	10.1539642558125	25.3024562007783	3.65117270973561e-08	2.77189587670309e-06	8.36962687578331
ENSMUSG00000026553	Copa	3333.75609317858	protein_coding	-0.445754359997774	7.63608845970568	-20.9313850183232	1.36311184082535e-07	7.81682208109944e-06	8.35929992172437
ENSMUSG00000040618	Pck2	3195.53	protein_coding	-0.815065514084671	6.17416427390604	-20.6653536992914	1.48942662783813e-07	8.30348436732988e-06	8.35381473685006
ENSMUSG00000029467	Atp2a2	4183.68400957373	protein_coding	-0.310361684698839	8.08452338431972	-21.3111229442669	1.20339835445807e-07	7.20336995081881e-06	8.35302544739001
ENSMUSG00000015112	Slc25a13	1830.19704402202	protein_coding	-0.690395532098364	6.94031602608574	-20.5286449656639	1.55949800198361e-07	8.59841384616616e-06	8.33770234650147
ENSMUSG00000052551	Adarb2	4113.53	protein_coding	1.01057357837472	5.37144077558088	21.4685078243284	1.14354338273617e-07	6.9322860464084e-06	8.33643579054844
ENSMUSG00000046718	Bst2	559.532	protein_coding	0.92472912793861	5.61237492651633	21.0502681501203	1.31064696494813e-07	7.66570280910882e-06	8.32907487787681
ENSMUSG00000021843	Ktn1	2624.72421408733	protein_coding	-0.60191842217517	6.99222132235769	-20.4957350340885	1.57692286832164e-07	8.63113939347849e-06	8.32098671223096
ENSMUSG00000045128	Rpl18a	1086.53	protein_coding	0.543795566561586	8.36441994971312	21.5117597676647	1.12769405649929e-07	6.88741437068031e-06	8.31536664844533
ENSMUSG00000026864	Hspa5	1238.36028393735	protein_coding	-0.557244209067568	8.27233092490007	-21.37379776447	1.17914437648623e-07	7.10062312004703e-06	8.3147040398867
ENSMUSG00000046865	Fbl	954.532	protein_coding	0.583773216055791	7.09729737990477	20.5044044876702	1.57231119982988e-07	8.63113939347849e-06	8.30979776859426
ENSMUSG00000021831	Ero1l	4208.53	protein_coding	-0.909781097835962	5.91686608316681	-20.6964638245762	1.47398660084307e-07	8.24801180050904e-06	8.30912839239128
ENSMUSG00000031633	Slc25a4	1434.4565473463	protein_coding	0.54488019067796	7.11624586923489	20.4810975820914	1.58474422699031e-07	8.6500561437773e-06	8.29873940005204
ENSMUSG00000094614	Gm21769	4048.53	pseudogene	-0.621580640225615	6.95213346331428	-20.415575685377	1.62030164057615e-07	8.77269261219327e-06	8.29686115659213
ENSMUSG00000049775	Tmsb4x	514.957271718031	protein_coding	0.732255825445948	6.99915524788997	20.4290003035369	1.61294289141941e-07	8.76443416713594e-06	8.29615289585274
ENSMUSG00000080076	Hist1h2aj	160.797	unprocessed_pseudogene	1.89243235271197	8.11051752342216	20.9060560058325	1.37459698541188e-07	7.85271194194705e-06	8.29500129883851
ENSMUSG00000024902	Mrpl11	2677.53	protein_coding	0.843522877673273	5.86978907747129	20.6415411548994	1.5013694991524e-07	8.34229238484108e-06	8.29038387237872
ENSMUSG00000092225	Gm2381	3868.53	protein_coding	-1.09451631120649	5.63562405337011	-20.9175721831999	1.36936148505979e-07	7.83770347896409e-06	8.27819141818372
ENSMUSG00000064326	Siva1	563.989396197669	protein_coding	0.790985774992183	5.87568880068037	20.588701992351	1.52826232137729e-07	8.47283293266903e-06	8.27739544956732
ENSMUSG00000027201	Myef2	2011.13299132422	protein_coding	-0.45425228403387	7.42434133883309	-20.5554547424209	1.54546515031218e-07	8.53847577560096e-06	8.27422120620528
ENSMUSG00000028640	Tfap2c	2254.62787756238	protein_coding	0.515606291873416	7.15240923617894	20.3963429792061	1.63091091380487e-07	8.81425216707242e-06	8.26345759840141
ENSMUSG00000037685	Atp8a1	3598.80140059387	protein_coding	-1.13780358294319	5.19323509413521	-21.6770837637162	1.06937867604296e-07	6.59238291571383e-06	8.26265085539517
ENSMUSG00000054766	Set	1594.95332332862	protein_coding	-0.177992089446549	9.18501542303405	-22.5961251413993	8.01650498805479e-08	5.19155082728574e-06	8.25844757777936
ENSMUSG00000032346	Ooep	1933.53	protein_coding	-0.768645302330449	5.93030102681814	-20.4970560765482	1.57621915205461e-07	8.63113939347849e-06	8.25656493487854
ENSMUSG00000031160	Eras	872.532	protein_coding	1.06019560849323	5.22241077813843	21.4587069126016	1.14717005692154e-07	6.93587787533909e-06	8.25428434802283
ENSMUSG00000024054	Smchd1	5068.77578749962	protein_coding	-0.524409002928562	7.15639183625538	-20.3576368184356	1.65250325729481e-07	8.88301795678924e-06	8.25198985327065
ENSMUSG00000007872	Id3	830.07137710457	protein_coding	1.40932710571097	4.70324289516825	23.3720519412183	6.3406606904015e-08	4.24344127140033e-06	8.24490155476598
ENSMUSG00000029447	Cct6a	618.430018737917	processed_transcript	-0.172417749090966	9.41728166744572	-22.9760608150903	7.13992794228814e-08	4.71533395028168e-06	8.23342856280897
ENSMUSG00000038374	Rbm8a	751.573956665684	protein_coding	0.530038104948155	7.14535644120744	20.2859754425215	1.69334585010818e-07	9.00590255750455e-06	8.22537479185095
ENSMUSG00000063856	Gpx1	532.998479777268	protein_coding	0.975408321304655	6.56523579065115	20.1079569085599	1.79988254010769e-07	9.47192126929875e-06	8.20494303315365
ENSMUSG00000009470	Tnpo1	3456.94960722771	protein_coding	-0.346325249954058	8.43378869939255	-21.2782023351574	1.21636560973398e-07	7.25209726327312e-06	8.20230073322446
ENSMUSG00000025544	Tm9sf2	1549.75112544338	protein_coding	-0.728742546755088	6.45832710289879	-20.0773331275285	1.81896989950426e-07	9.52674232093204e-06	8.19149372510779
ENSMUSG00000029610	Aimp2	944.564532931891	protein_coding	0.766856674778236	5.89071830846002	20.2895361073978	1.69128952151178e-07	9.00590255750455e-06	8.18962349725106
ENSMUSG00000020163	Uqcr11	244.265732581461	protein_coding	1.02130178206475	5.34028218356408	20.9464744729597	1.35632172837233e-07	7.80058247983159e-06	8.18354161117673
ENSMUSG00000087267	4933427J07Rik	1328.53	antisense	-0.518211277395047	6.89084058471757	-20.0746521507753	1.82065187055643e-07	9.52674232093204e-06	8.18157766075834
ENSMUSG00000016933	Plcg1	2963.20883532612	protein_coding	-0.604873696623662	6.70279245111435	-20.0194251880523	1.85569734560664e-07	9.61411198933341e-06	8.17328837809987
ENSMUSG00000056999	Ide	2350.12860719513	protein_coding	-0.446017661813839	7.22976193082452	-20.1650924970928	1.76487796468463e-07	9.30400315101904e-06	8.17048101147598
ENSMUSG00000006678	Pola1	2591.18190721151	protein_coding	-0.41319752772517	7.42278604922824	-20.2316647872626	1.72506695088282e-07	9.11011191688537e-06	8.15691706576941
ENSMUSG00000025007	Aldh18a1	1729.94563970248	protein_coding	-0.626424700984365	7.13330743340826	-20.0706016741115	1.823196392451e-07	9.52674232093204e-06	8.15446792549913
ENSMUSG00000078440	Dohh	895.405258529626	protein_coding	0.774876690968806	6.30527876433483	19.9740343838769	1.88507759555774e-07	9.73276575067261e-06	8.14864890226095
ENSMUSG00000018102	Hist1h2bc	531.532	protein_coding	0.93358043613614	6.00065014521867	20.0608767121248	1.82932221344397e-07	9.52674232093204e-06	8.13554405167948
ENSMUSG00000024590	Lmnb1	1962.88723712792	protein_coding	-0.401545677544277	7.59944239746951	-20.2799978891131	1.69680437492258e-07	9.0083524137895e-06	8.1324405686111
ENSMUSG00000076437	2700094K13Rik	363.304920275032	protein_coding	1.1564473274555	5.21947805714335	21.0139702371449	1.32641757356822e-07	7.7243259046805e-06	8.13075636847078
ENSMUSG00000027642	Rpn2	722.825846834937	protein_coding	-0.350096234361456	8.03135063246012	-20.6404086143797	1.50194022436654e-07	8.34229238484108e-06	8.13068802622339
ENSMUSG00000053560	Ier2	1317.53	protein_coding	0.527286277563753	7.25821560463524	20.0658374317151	1.82619449472583e-07	9.52674232093204e-06	8.12760593709611
ENSMUSG00000092035	Peg10	6388.39345387279	protein_coding	1.2553863114716	4.91722344025075	21.7797484810044	1.03489823958239e-07	6.42513578537425e-06	8.11942491150493
ENSMUSG00000031490	Eif4ebp1	776.532	protein_coding	0.3826936687265	8.19382574996918	20.7799628863082	1.43344009900215e-07	8.09651156671348e-06	8.1155399922765
ENSMUSG00000072940	Gm10443	77.1039	processed_pseudogene	0.50106637349703	8.31995383588054	20.8995892658712	1.37754690872186e-07	7.85463132071787e-06	8.11155454773816
ENSMUSG00000035299	Mid1	862.689839458853	protein_coding	-0.427217952953004	7.32940313751527	-20.0320436644476	1.84762272563177e-07	9.58881092962162e-06	8.10358645361167
ENSMUSG00000002870	Mcm2	2098.49367585507	protein_coding	-0.265223641890771	8.49061707465775	-21.0438422586906	1.31342322435913e-07	7.66570280910882e-06	8.08786218501765
ENSMUSG00000061613	U2af1	702.532	protein_coding	0.899447516265616	6.84947720683566	19.7844023625941	2.01369522310139e-07	1.02212040133402e-05	8.08331903401545
ENSMUSG00000039943	Plcb4	2473.71281695855	protein_coding	-1.17887624060114	5.39979423484532	-20.5548396399517	1.545785491007e-07	8.53847577560096e-06	8.07520808532316
ENSMUSG00000038587	Akap12	6039.53	protein_coding	-0.235650324199101	9.27600085947007	-22.2212966680592	9.00358609209625e-08	5.70777971479747e-06	8.07163264112882
ENSMUSG00000027500	Stmn2	1774.33544629982	protein_coding	-0.401072835386356	7.44858779785867	-20.0118479566439	1.86056538019594e-07	9.62274167117174e-06	8.07039614875785
ENSMUSG00000106281	AL589651.4	52.1077	miRNA	0.618396277720142	8.03503353402617	20.4701272543564	1.59063510077229e-07	8.6588757505628e-06	8.06820172089728
ENSMUSG00000032423	Syncrip	1662.27938180951	protein_coding	-0.405065721713856	7.91838811413956	-20.3128252431637	1.67790975039365e-07	8.9714430764375e-06	8.05033416435032
ENSMUSG00000052456	Asna1	1045.53	protein_coding	0.442898917872096	7.15847715070969	19.7448626979195	2.04175686784014e-07	1.03113869112149e-05	8.02650835737713
ENSMUSG00000022789	Dnm1l	3839.94142774711	protein_coding	-0.632532035199048	7.37834419252853	-19.828315269595	1.98304383901885e-07	1.01340959725642e-05	8.02359128945444
ENSMUSG00000089281	Scarna6	103.221	scaRNA	1.12465518518823	4.9946197906449	21.0745559297649	1.3002138819474e-07	7.6458174048214e-06	8.02074332676699
ENSMUSG00000020717	Pecam1	2645.69332952796	protein_coding	-0.919421944058863	6.47031106499957	-19.5609117636188	2.17831105731049e-07	1.09002110458051e-05	8.01385711288889
ENSMUSG00000028587	Orc1	2302.34062302536	protein_coding	-0.671857710089219	6.16562112934175	-19.5585707429592	2.18011475873701e-07	1.09002110458051e-05	7.99500609506208
ENSMUSG00000032193	Ldlr	4326.53	protein_coding	-0.800055362142794	5.90904194593173	-19.6684184258352	2.09728367617849e-07	1.05740397962227e-05	7.99032425781067
ENSMUSG00000022682	Rrn3	3392.53	protein_coding	-0.36808521440612	8.11198533499038	-20.3332580697698	1.66627026645517e-07	8.92509006001984e-06	7.98756678460933
ENSMUSG00000028059	Arhgef2	1328.88381317559	protein_coding	-0.682378747360166	6.50285196004397	-19.4789310336607	2.24250149553961e-07	1.11564449403095e-05	7.98640643472963
ENSMUSG00000090733	Rps27	157.058459499514	protein_coding	0.366311748169348	9.15087663184426	21.7652905496896	1.03967643079366e-07	6.44149217915851e-06	7.98613443575462
ENSMUSG00000042312	S100a13	510.532	protein_coding	1.97725649430466	4.37588418075912	24.9389852291915	4.03798442106601e-08	3.01085344587128e-06	7.98005435552891
ENSMUSG00000033379	Atp6v0b	567.452484018848	protein_coding	0.590298643876241	6.51145346990318	19.4522496447817	2.2638559615565e-07	1.12094167501831e-05	7.9770526830209
ENSMUSG00000062647	Rpl7a	705.436810352376	protein_coding	0.454072060854312	10.6575878828224	25.8377273373316	3.15601075790545e-08	2.52220657617821e-06	7.96976847264653
ENSMUSG00000038685	Rtel1	1185.00496258676	protein_coding	-0.501906474410883	7.5923140637462	-19.8098805401682	1.99584611446293e-07	1.01773382305522e-05	7.9625556453064
ENSMUSG00000034543	Morc2a	2417.81918195178	protein_coding	-0.66289091700704	6.5809164005023	-19.4007284610835	2.30575031317471e-07	1.13211586863704e-05	7.95832314292826
ENSMUSG00000069301	Hist1h2ag	281.214	protein_coding	0.969878032735315	6.10473360843037	19.4674600691613	2.25165402460335e-07	1.11834631050093e-05	7.95590860093591
ENSMUSG00000040078	Gm9769	276.318	processed_pseudogene	-0.691891916819777	6.40513095581351	-19.3646356393189	2.3356256654357e-07	1.14304911434328e-05	7.94427550725347
ENSMUSG00000032042	Srpr	2312.28237504527	protein_coding	-0.825077270790953	6.17327507573882	-19.4107188025389	2.29755808342548e-07	1.12993981749349e-05	7.94346658046939
ENSMUSG00000031758	Cdyl2	7882.53	protein_coding	-0.569512798365342	6.94039016172202	-19.4222709823546	2.28812645826949e-07	1.12714609745147e-05	7.94213775605877
ENSMUSG00000026434	Nucks1	4396.04224808047	protein_coding	-0.194488572380767	9.42931894691087	-22.0930516887516	9.37261142651918e-08	5.89200001580491e-06	7.91833148422419
ENSMUSG00000060288	Ppih	612.74330767178	protein_coding	0.969473022509709	5.62313445158197	19.6285028122105	2.12696011714347e-07	1.07056992562888e-05	7.91099830688965
ENSMUSG00000031715	Smarca5	2453.90029096141	protein_coding	-0.303082570106644	8.27616804809379	-20.2995711863912	1.68550943943914e-07	8.99606983049855e-06	7.90705264744692
ENSMUSG00000029642	Polr1d	959.985160996163	protein_coding	0.637182793953909	6.26673086587647	19.2718015690676	2.41451632699966e-07	1.16852920937064e-05	7.90691324763454
ENSMUSG00000018379	Srsf1	1243.340978527	protein_coding	-0.261881429912524	8.45380178123996	-20.5032409229043	1.5729292574307e-07	8.63113939347849e-06	7.90428700910216
ENSMUSG00000031432	Prps1	1423.78427605535	protein_coding	0.486029948178677	7.02387446716215	19.3516672859478	2.3464676177719e-07	1.14648789343785e-05	7.90204214594584
ENSMUSG00000031591	Asah1	1148.94447704901	protein_coding	-0.72627161492442	6.55049068510114	-19.2413754033175	2.44103024574759e-07	1.17737588851476e-05	7.90182202065731
ENSMUSG00000022822	Abcc5	2415.49219653906	protein_coding	-0.886319738759953	5.9587251795234	-19.3712059793986	2.33015445620487e-07	1.14223183123165e-05	7.89964618355335
ENSMUSG00000040093	Bmf	1511.82480199081	protein_coding	-1.11821579156563	5.10546882140166	-20.4210553756027	1.6172933163645e-07	8.77221062516913e-06	7.89889823162805
ENSMUSG00000027018	Hat1	848.615144187289	protein_coding	0.266773896553065	8.33535514149752	20.3404171644776	1.66221391308127e-07	8.91926176324627e-06	7.8905213323555
ENSMUSG00000094812	Gm22614	60.1256	snRNA	2.16320256071745	11.147038228651	24.7780431626382	4.22404826309306e-08	3.13403521623909e-06	7.88778898930852
ENSMUSG00000095260	Gm25890	60.1256	snRNA	2.16320256071745	11.147038228651	24.7780431626382	4.22404826309306e-08	3.13403521623909e-06	7.88778898930852
ENSMUSG00000025880	Smad7	3020.4714906587	protein_coding	-0.843609252764855	6.14161002745388	-19.2356988924219	2.446013513177e-07	1.17788878297205e-05	7.88003604171608
ENSMUSG00000035828	Pim3	2214.53	protein_coding	-0.470260962863306	7.2207817119627	-19.3085707129925	2.38291199934992e-07	1.16052062671744e-05	7.8561609052052
ENSMUSG00000032745	Gpbp1	2094.83433874299	protein_coding	-0.478398791382579	6.98039797485419	-19.1921209826375	2.48465806260321e-07	1.19458384197062e-05	7.85063146384051
ENSMUSG00000038095	Sbno1	4373.40261661244	protein_coding	-0.320572880850828	7.93093115190984	-19.7901060899042	2.00968363814347e-07	1.02181021391833e-05	7.8461848112054
ENSMUSG00000029776	Hibadh	1429.09142963428	protein_coding	-0.727437722694098	6.37000236518104	-19.0786745727979	2.58856844594744e-07	1.23466497194087e-05	7.84193989983579
ENSMUSG00000037772	Mrpl23	334.661415404672	protein_coding	0.76425162667552	5.76654270427158	19.2713457472403	2.41491110858654e-07	1.16852920937064e-05	7.83871577382433
ENSMUSG00000022982	Sod1	441.534	protein_coding	0.325031457564221	7.93807269471719	19.7786506179701	2.01774982705928e-07	1.0224513415397e-05	7.83449174717448
ENSMUSG00000033938	Ndufb7	436.308964897904	protein_coding	0.841322173998321	5.52798980164854	19.4455361027851	2.26926558873532e-07	1.12153226440638e-05	7.83116718027108
ENSMUSG00000048108	Tmem72	16947.5	protein_coding	-0.339731787256081	8.87358696867254	-20.8558989725335	1.3976672358938e-07	7.92424580591942e-06	7.82758437062603
ENSMUSG00000022174	Dad1	697.199763867012	protein_coding	0.977574280329443	5.25435893636193	19.7732261752782	2.02158223430719e-07	1.02266876361442e-05	7.82322480489941
ENSMUSG00000005625	Psmd4	841.810397920006	protein_coding	0.402656933804536	7.33965164216422	19.2785506652969	2.40867961927296e-07	1.16852920937064e-05	7.8159953074253
ENSMUSG00000036707	Cab39	2153.47587192798	protein_coding	-0.52494956855074	6.70354004837382	-18.9687039190686	2.69404842248267e-07	1.27632748374919e-05	7.79524806860075
ENSMUSG00000024194	Cuta	416.627521931398	protein_coding	1.00813122355198	5.16072809276642	19.8063920615081	1.9982793291044e-07	1.01773382305522e-05	7.78868865847474
ENSMUSG00000006005	Tpr	3226.40567923889	protein_coding	-0.24974046441047	8.50372271359862	-20.2563931291711	1.71054066300815e-07	9.04930218005842e-06	7.78712588140149
ENSMUSG00000030738	Eif3c	1886.12217513102	protein_coding	-0.341226925512441	9.08040723835914	-20.9931197886668	1.33557441277197e-07	7.76260648537426e-06	7.75854276865156
ENSMUSG00000032624	Eml4	5157.90311436896	protein_coding	-0.424991162985307	7.33328158654231	-19.0996287915716	2.56900820198924e-07	1.22728342546224e-05	7.75259819488129
ENSMUSG00000033475	Tomm6	451.750814543003	protein_coding	0.921447528854393	5.81173100191129	18.9655403677697	2.6971544882716e-07	1.27632748374919e-05	7.74288990727456
ENSMUSG00000052180	Serpinb6c	1121.208689001	protein_coding	-1.74531483998171	4.32205678416896	-23.6763415122903	5.79551298273984e-08	3.96695602775283e-06	7.74039813095352
ENSMUSG00000101776	Gm28268	2323.53	lincRNA	-0.609374928486059	8.340004143726	-19.8694883654314	1.95478716935869e-07	1.0040923017446e-05	7.73209025576356
ENSMUSG00000020307	Cdc34	958.190823069239	protein_coding	0.482103861493752	7.08757084213869	18.9215525585399	2.74076871284646e-07	1.28282490735706e-05	7.72936643554432
ENSMUSG00000024208	Uqcc2	296.661837047402	protein_coding	0.908702278500366	5.79054636537713	18.9330073959058	2.72933424291959e-07	1.28282490735706e-05	7.72829042569819
ENSMUSG00000057388	Mrpl18	464.204821607301	protein_coding	1.03448200478681	5.83907780828829	18.8813767001101	2.7813069219022e-07	1.29574405730603e-05	7.71662266957426
ENSMUSG00000035150	Eif2s3x	2286.21675954914	protein_coding	-0.402433984688164	8.09225947232964	-19.5827447184518	2.16157094395986e-07	1.0843580182813e-05	7.7102051877746
ENSMUSG00000041057	Wdr43	3245.53	protein_coding	-0.35447741299894	8.1194001945627	-19.5980339690645	2.14993542503343e-07	1.0803245750306e-05	7.70359454424621
ENSMUSG00000030672	Mylpf	184.3908119499	protein_coding	0.903736970894348	5.98615598469604	18.7455781617037	2.92347673479598e-07	1.34735509821909e-05	7.69524039152448
ENSMUSG00000032115	Hyou1	3134.63796612611	protein_coding	-0.536350734370649	7.02888856586723	-18.792853536806	2.87306380488609e-07	1.32819529650803e-05	7.69306310536528
ENSMUSG00000068523	Gng5	406.909289071341	protein_coding	0.590050626719241	6.32808633053786	18.6373854971272	3.04269007393935e-07	1.3895105475958e-05	7.68238787935632
ENSMUSG00000031231	Cox7b	259.497865280329	protein_coding	0.480400017226159	7.11250031843826	18.780726920567	2.88590010176201e-07	1.33208006386861e-05	7.67066862814731
ENSMUSG00000093930	Hmgcs1	3028.53	protein_coding	-0.660291118706877	6.56288460920111	-18.611882634916	3.07159160419422e-07	1.39845842597624e-05	7.67048033942404
ENSMUSG00000058655	Eif4b	3648.53	protein_coding	-0.151543993453092	9.58833145878476	-21.7349014607364	1.04980194671885e-07	6.49084335328283e-06	7.66979400024431
ENSMUSG00000025266	Gnl3l	2480.85590975609	protein_coding	-0.452293821541075	7.59615164699463	-19.0300200010728	2.63464450763027e-07	1.25465028224694e-05	7.66040737378024
ENSMUSG00000056612	Ppp1r14b	714.532	protein_coding	0.825886395821312	5.94312584963977	18.638391029799	3.04155690517672e-07	1.3895105475958e-05	7.65348885586349
ENSMUSG00000106943	Snora26	2141.9015279212	lincRNA	1.20754713580773	4.91892260611232	19.8293532663006	1.98232577536766e-07	1.01340959725642e-05	7.65143699264197
ENSMUSG00000006585	Cdt1	1984.53	protein_coding	0.442403049953871	7.08950155537376	18.720476286395	2.95065392421403e-07	1.357797852507e-05	7.65096520963589
ENSMUSG00000053931	Cnn3	1030.51436826351	protein_coding	-0.375661217483425	7.78362004498366	-19.1317497002778	2.53935029725603e-07	1.21698464246007e-05	7.6416373520605
ENSMUSG00000091021	Gm17300	1322.53	lincRNA	0.597792133981072	6.34055706850167	18.5017049040219	3.20010173560971e-07	1.45037491784821e-05	7.63256525283814
ENSMUSG00000106175	AL662809.1	51.1375	miRNA	1.54024679714973	5.10593500186291	19.50533303949	2.22159637385546e-07	1.10707710510751e-05	7.62893540013145
ENSMUSG00000083621	Gm14586	208.159	processed_pseudogene	0.271528297615664	8.15898090843797	19.4516479010849	2.26434023340582e-07	1.12094167501831e-05	7.62283855652216
ENSMUSG00000011257	Pabpc4	2092.91015707064	protein_coding	-0.394338767509787	7.98918446625139	-19.2429767157894	2.43962658690448e-07	1.17737588851476e-05	7.61524108062881
ENSMUSG00000030091	Nup210	2158.00975987068	protein_coding	-0.696640507211383	6.29087875016997	-18.4492058737131	3.26348421760288e-07	1.46317877819624e-05	7.61176292189864
ENSMUSG00000064694	Gm24146	137.861	misc_RNA	0.997657571381615	5.09549177450991	19.283652290831	2.40427833854592e-07	1.16852920937064e-05	7.61056078949561
ENSMUSG00000038759	Nup205	5568.42697108983	protein_coding	-0.311496129031671	8.2035960928418	-19.4241367257522	2.28660734001493e-07	1.12714609745147e-05	7.60007802089616
ENSMUSG00000032291	Crabp1	597.532	protein_coding	1.20649707060575	4.67240612262241	20.2585083026313	1.70930462497445e-07	9.04930218005842e-06	7.5990890736684
ENSMUSG00000064220	Hist2h2aa1	381.555	protein_coding	3.12014425922145	4.79437805518241	22.2400532029388	8.95101557461241e-08	5.69007001455226e-06	7.59765199377727
ENSMUSG00000099587	Gm28967	112.228	sense_intronic	0.824903370450898	5.55725493118718	18.6799422619109	2.99514931395251e-07	1.37197014839876e-05	7.59453743150734
ENSMUSG00000094856	Gm21962	812.532	protein_coding	-2.04545689223937	6.10392290701108	-18.4732368780147	3.23429551128092e-07	1.45708164645398e-05	7.57402641689371
ENSMUSG00000036199	Ndufa13	1038.53	protein_coding	0.784089368533943	6.13716385896347	18.3517921326317	3.38492105687195e-07	1.501514941049e-05	7.56992318485227
ENSMUSG00000031604	Msmo1	769.996399324322	protein_coding	-0.911072897102447	5.36208162288626	-18.8102981990425	2.85471221164905e-07	1.32174494988971e-05	7.56661406653095
ENSMUSG00000030432	Rpl28	186.567035002591	protein_coding	0.627887535052814	6.80168926918864	18.3909829072014	3.33545665800436e-07	1.48890402938151e-05	7.56620353833098
ENSMUSG00000025016	Tm9sf3	5939.53	protein_coding	-0.564263444684887	6.55306937430988	-18.3337663360336	3.40795251991953e-07	1.50596419516268e-05	7.56538867954177
ENSMUSG00000040648	Ppip5k2	4492.86086370035	protein_coding	-0.616666748451483	6.61940526786	-18.3129857550331	3.43472568493028e-07	1.51334416578402e-05	7.55400647176642
ENSMUSG00000104222	Gm7292	1955.59346867764	TEC	-0.711160258458241	6.13610125746757	-18.3045144583331	3.44570860007714e-07	1.51596043519353e-05	7.55153461548514
ENSMUSG00000027122	Arl14ep	1684.18302655171	protein_coding	-0.502991310872231	6.71040518538139	-18.3220631949965	3.4230011695421e-07	1.51039298301866e-05	7.54955448855448
ENSMUSG00000025862	Stag2	3635.46227514963	protein_coding	-0.603898989818076	6.47918256509048	-18.2761201661345	3.48281436329107e-07	1.51894178232995e-05	7.54658653567714
ENSMUSG00000021556	Golm1	3359.36462480656	protein_coding	-0.761759099963097	6.15971814214444	-18.2830043930312	3.473776386268e-07	1.51723001283748e-05	7.54465234156907
ENSMUSG00000043284	Tmem11	1004.06802724043	protein_coding	0.825919208036823	5.59436437466144	18.4901026071601	3.21398760856447e-07	1.45228742330457e-05	7.54005799289481
ENSMUSG00000053398	Phgdh	902.494024712737	protein_coding	-0.458890059280819	7.84108482007724	-18.9119426495384	2.75040366619282e-07	1.28533250023994e-05	7.53841626856045
ENSMUSG00000018583	G3bp1	5039.80103052882	protein_coding	-0.234675902237873	9.0479476210175	-20.3735532266271	1.64358502541254e-07	8.85091154634794e-06	7.53757866224566
ENSMUSG00000038803	Ost4	403.494121080941	protein_coding	1.04113899685627	5.21604018866123	18.8359868745122	2.82793071119027e-07	1.31339242566548e-05	7.52577815654621
ENSMUSG00000025612	Bach1	3624.04606501872	protein_coding	-0.571259415989114	6.38658548285726	-18.1994715211596	3.58527415742469e-07	1.55460177714942e-05	7.51938499722459
ENSMUSG00000037601	Nme1	560.643550063998	protein_coding	0.519860967725288	6.71569827500646	18.2452269535903	3.52370396658838e-07	1.53454754336252e-05	7.51769479386175
ENSMUSG00000056300	Gm13247	1808.859649275	protein_coding	-0.455833905786465	6.94877384284009	-18.2901056110075	3.4644815265362e-07	1.51723001283748e-05	7.50804315340709
ENSMUSG00000064345	mt-Nd2	833.532	protein_coding	0.351754761201642	7.91447613524598	18.9219027454192	2.74041834052934e-07	1.28282490735706e-05	7.50766113666694
ENSMUSG00000052397	Ezr	2532.60187931266	protein_coding	-0.401277041524592	7.60756141706463	-18.5853359568571	3.10200890924773e-07	1.4101704344022e-05	7.47879909669738
ENSMUSG00000022452	Smdt1	393.494631130279	protein_coding	0.869323587258713	5.61872580544151	18.2869769701719	3.4685731404795e-07	1.51723001283748e-05	7.47542639346184
ENSMUSG00000023809	Rps6ka2	5199.53	protein_coding	-0.854512281712246	6.20547819936015	-18.0908238472238	3.7364492415068e-07	1.60716828707419e-05	7.47525196398919
ENSMUSG00000028347	Tmeff1	1370.46143978417	protein_coding	-0.78383577098935	6.85278532871754	-18.1415695095424	3.66495443682831e-07	1.58457864564394e-05	7.46782317752526
ENSMUSG00000027002	Nckap1	2668.36857300736	protein_coding	-0.406889271467406	7.48031329548451	-18.4576657691203	3.25317449365838e-07	1.46317877819624e-05	7.46322987913939
ENSMUSG00000040761	Spen	3668.36351812559	protein_coding	0.855460078741315	5.53816868803009	18.2915220048301	3.46263098587964e-07	1.51723001283748e-05	7.45907045922776
ENSMUSG00000020257	Wdr82	2951.93121388826	protein_coding	-0.302104894234766	8.13038723461706	-18.9851973365123	2.67792060219055e-07	1.27122963941902e-05	7.45496628808118
ENSMUSG00000026956	Uap1l1	673.597965387595	protein_coding	0.570080051032788	6.53509234961314	18.0274632673067	3.82795886032009e-07	1.62696373117056e-05	7.4474277596489
ENSMUSG00000019362	D8Ertd738e	454.533	protein_coding	1.02045280914423	4.96181303827109	18.874440806257	2.78837433116382e-07	1.29702570088454e-05	7.42684940923512
ENSMUSG00000032171	Pin1	3603.53	protein_coding	0.606738516804786	6.23847741468818	17.9189459548768	3.99068450799272e-07	1.6842145896162e-05	7.41277144579075
ENSMUSG00000029404	Arl6ip4	437.242447275713	protein_coding	0.863582803827281	5.30251908001245	18.3494604582737	3.38789021275657e-07	1.501514941049e-05	7.41198371368067
ENSMUSG00000020423	Btg2	2538.53	protein_coding	1.37408093594852	4.43299514864543	20.3802491818939	1.63984957719366e-07	8.84664990037566e-06	7.41126890467484
ENSMUSG00000007850	Hnrnph1	555.385834996943	protein_coding	-0.273753840480216	8.35234608436557	-19.1120093776066	2.55753043073735e-07	1.22374573110233e-05	7.41020423644201
ENSMUSG00000010277	2610507B11Rik	4146.03392629846	protein_coding	-0.323764729897578	8.21217144252314	-18.9447220024445	2.71769666859431e-07	1.28282490735706e-05	7.40584096412388
ENSMUSG00000067916	Gm13139	547.950659540981	protein_coding	-1.02810148563594	5.21290882505966	-18.4820583635125	3.22365544129449e-07	1.45446880413601e-05	7.4018945541014
ENSMUSG00000020152	Actr2	3388.26052690729	protein_coding	-0.311922190945128	8.00530155166589	-18.7013457854887	2.97155947215716e-07	1.36482963175473e-05	7.38938434610446
ENSMUSG00000020173	Cobl	3347.52082560034	protein_coding	-1.03809992297172	5.38573968557169	-18.2277931875058	3.54702028212401e-07	1.54023717424197e-05	7.3795531598071
ENSMUSG00000031665	Sall1	5047.53	protein_coding	-0.693686976449319	6.26375485807561	-17.8226741820341	4.1416718148342e-07	1.72851522727712e-05	7.37593732981149
ENSMUSG00000078566	Bnip3	957.878419106376	protein_coding	-1.05145119997822	5.53530865605043	-18.0893174557947	3.73859573584764e-07	1.60716828707419e-05	7.37454228055716
ENSMUSG00000070923	Klhl9	3969.53	protein_coding	-0.808804756443948	5.48742473176927	-18.081657161208	3.74953284415633e-07	1.60727121874542e-05	7.36997350001236
ENSMUSG00000032902	Slc16a1	4221.53	protein_coding	-0.547933724432617	6.69231102497949	-17.8300541131732	4.12986989869303e-07	1.72598693443431e-05	7.35864590574679
ENSMUSG00000061477	Rps7	756.532	protein_coding	0.622989604546278	7.25885055237675	18.0534363112599	3.79014139724226e-07	1.61647874565905e-05	7.35390655805566
ENSMUSG00000002718	Cse1l	2249.98036298175	protein_coding	-0.412838165136621	8.03910009999715	-18.628554444766	3.05266278165523e-07	1.39194937672167e-05	7.35067049088539
ENSMUSG00000000088	Cox5a	485.532	protein_coding	0.531357348433468	7.31611266241259	18.0687975125345	3.76797549970879e-07	1.61058173244309e-05	7.34500203721614
ENSMUSG00000034681	Rnps1	1569.05072612098	protein_coding	0.448786768186798	7.18421490743341	17.9845315918502	3.89141529184963e-07	1.65159799583036e-05	7.33930047998396
ENSMUSG00000027187	Cat	1941.47591357471	protein_coding	-0.615290363872126	6.17765675289174	-17.7220222016229	4.30653124424902e-07	1.78738891379059e-05	7.33599180413007
ENSMUSG00000005198	Polr2a	6355.84798269818	protein_coding	0.933200116887871	5.29041468288781	18.1278468358464	3.68413312340552e-07	1.58830008931438e-05	7.33270093945312
ENSMUSG00000028082	Sh3d19	3042.43752455918	protein_coding	-0.671780976238971	6.28938948997368	-17.6886073642172	4.36290577561401e-07	1.80579828720972e-05	7.32438709965596
ENSMUSG00000078193	Gm2000	242.511	protein_coding	0.375139352320708	8.01597147081055	18.4947406275197	3.20842850575641e-07	1.45195885797401e-05	7.2966525820177
ENSMUSG00000028211	Trp53inp1	3028.15833473659	protein_coding	0.489906446251511	7.79631492718476	18.2829556964772	3.47384022374185e-07	1.51723001283748e-05	7.29225807947193
ENSMUSG00000094344	Gm11942	155.392	processed_pseudogene	0.69262558848983	7.16340931298916	17.8465061684877	4.10369760689163e-07	1.71854486824602e-05	7.29146347161462
ENSMUSG00000025964	Adam23	2593.35895105601	protein_coding	-0.397528059788825	7.77233610930662	-18.228367096833	3.546249929517e-07	1.54023717424197e-05	7.28133487969349
ENSMUSG00000029249	Rest	6794.12678909022	protein_coding	-0.242189833381282	8.78542723903736	-19.3192399060686	2.37382992149474e-07	1.15797427452915e-05	7.27609499796369
ENSMUSG00000050917	Fgf4	2825.53	protein_coding	-0.416036850353029	7.29824374616778	-17.8768009331148	4.05599691049602e-07	1.70459651976916e-05	7.27232594634402
ENSMUSG00000029578	Wipi2	2893.3298964669	protein_coding	-0.466452998205756	6.78622403009278	-17.6196031398195	4.48200554843305e-07	1.83744987612447e-05	7.26218527997064
ENSMUSG00000020422	Tns3	6168.35078828135	protein_coding	-0.31386025084295	7.95133599152311	-18.3409794684311	3.39871497191933e-07	1.5040940528896e-05	7.2618422511084
ENSMUSG00000081382	Rpl18-ps1	320.733	processed_pseudogene	0.948533771275956	6.20849479048031	17.5191243498562	4.66211487926874e-07	1.89659279061296e-05	7.25804067514831
ENSMUSG00000030082	Sec61a1	1681.37248442217	protein_coding	-0.441602098565188	7.10238075826399	-17.7362443642399	4.28278904714966e-07	1.779993472722e-05	7.2576894574912
ENSMUSG00000066000	2610305D13Rik	1599.15429584086	protein_coding	-0.492304674017037	6.8348225477892	-17.6015550073413	4.51376451482017e-07	1.84536203953512e-05	7.24863880878001
ENSMUSG00000020857	Nme2	559.703832429943	protein_coding	0.440962632971943	8.0068842514491	18.354843900747	3.38103941280031e-07	1.501514941049e-05	7.24391907712738
ENSMUSG00000046721	Rpl14-ps1	505.532	pseudogene	0.339894646003719	8.75595930222549	19.1832450346757	2.49261422774505e-07	1.19649464743628e-05	7.23289165390982
ENSMUSG00000020788	Atp2a3	4249.40375220549	protein_coding	-1.03899003444931	4.90595874932645	-18.352685025443	3.38378483184221e-07	1.501514941049e-05	7.22658329166876
ENSMUSG00000027070	Lrp2	13905.2418690326	protein_coding	-0.737832207278878	5.68488414752696	-17.5247450018158	4.65182471353935e-07	1.89659279061296e-05	7.21580301303717
ENSMUSG00000061360	Phf5a	547.640497908296	protein_coding	0.796928444868845	6.10983414445425	17.4012563513158	4.88399583085003e-07	1.96728137695995e-05	7.21042454669615
ENSMUSG00000029472	Anapc5	950.828563799856	protein_coding	-0.264607642440826	8.41999661228687	-18.6981949473855	2.97501883190572e-07	1.36482963175473e-05	7.21022910531553
ENSMUSG00000030744	Rps3	1159.12470415314	protein_coding	0.234132156629137	10.820255065706	24.2814428498619	4.86284410949607e-08	3.43013151751754e-06	7.20484717188306
ENSMUSG00000002900	Lamb1	3277.70313319606	protein_coding	-0.78275885111317	6.15503023020155	-17.3617431889101	4.96105213851141e-07	1.99031583057583e-05	7.19559931255973
ENSMUSG00000001415	Smg5	2935.74474223111	protein_coding	0.368927029197621	7.57896995869972	17.8848133455815	4.04348681210322e-07	1.70171898062871e-05	7.19419502688874
ENSMUSG00000052459	Atp6v1a	2582.86558816744	protein_coding	-0.45770530332048	6.81334685901098	-17.4535881101251	4.78403139644085e-07	1.94001834590622e-05	7.1904581632465
ENSMUSG00000064999	Gm26035	129.034	misc_RNA	1.56156475741423	4.42623001487682	19.5501372226909	2.18662671725358e-07	1.09146090077663e-05	7.1846777951864
ENSMUSG00000027566	Psma7	422.125384582084	protein_coding	0.383540259876381	7.22700937005992	17.6355166811143	4.45421387544348e-07	1.83348866771509e-05	7.18466345416159
ENSMUSG00000071076	Jund	2673.53	protein_coding	0.833164859294572	6.01096136098986	17.3244238622371	5.03510440937921e-07	2.01464517173683e-05	7.17626415617555
ENSMUSG00000029725	Ppp1r35	395.148134694446	protein_coding	1.16372641428457	4.55477099347179	18.8311961140521	2.83290347768048e-07	1.3136715524818e-05	7.1653670015178
ENSMUSG00000023088	Abcc1	3507.9580238283	protein_coding	-0.607918791684494	6.12558834770488	-17.2628506350663	5.16005359538235e-07	2.05179166639685e-05	7.15666723869642
ENSMUSG00000031403	Dkc1	987.076493013819	protein_coding	-0.354788370730844	7.96156292256055	-18.0852266328448	3.74443194363273e-07	1.60727121874542e-05	7.15277322810183
ENSMUSG00000046330	Rpl37a	379.557	protein_coding	0.615036988885845	7.58674902945378	17.7740611988899	4.22038055201633e-07	1.7589211540574e-05	7.15075066597539
ENSMUSG00000078636	Gm7336	797.532	processed_pseudogene	-0.430616365114023	8.7467382781385	-18.9291813610088	2.73314741631523e-07	1.28282490735706e-05	7.14940008106043
ENSMUSG00000094708	Gm10359	797.532	processed_pseudogene	-0.430616365114023	8.7467382781385	-18.9291813610088	2.73314741631523e-07	1.28282490735706e-05	7.14940008106043
ENSMUSG00000095937	Gm12671	797.532	processed_pseudogene	-0.430616365114023	8.7467382781385	-18.9291813610088	2.73314741631523e-07	1.28282490735706e-05	7.14940008106043
ENSMUSG00000036733	Rbm42	1428.9249718299	protein_coding	0.649472384523572	6.19999135535331	17.2318561597724	5.2242843261843e-07	2.06830724265497e-05	7.14524420421498
ENSMUSG00000025132	Arhgdia	1674.03203388394	protein_coding	0.423101293507038	7.06472254465082	17.4543796634137	4.78253736768102e-07	1.94001834590622e-05	7.144542174334
ENSMUSG00000028837	Psmb2	653.458442759095	protein_coding	0.527244968396658	6.47903606055835	17.2557016681936	5.17478839412791e-07	2.05186466214677e-05	7.14386350872936
ENSMUSG00000079471	Gm7325	640.103220790654	protein_coding	0.821812952023748	5.45233243986224	17.4248052008785	4.83872107443334e-07	1.95428399953827e-05	7.1387526747088
ENSMUSG00000041598	Cdc42ep4	2433.73708634304	protein_coding	0.609720061063104	6.28787377136477	17.2177903747799	5.25373339523631e-07	2.07722940517705e-05	7.13828323066852
ENSMUSG00000029328	Hnrnpdl	1753.31935238259	protein_coding	-0.356935634576024	7.59909642260717	-17.7562728625516	4.24960634615205e-07	1.76864849162774e-05	7.13823624731802
ENSMUSG00000100750	Gm29084	1247.53	antisense	-0.621245146831876	6.06301198834288	-17.1981712733564	5.29512567948019e-07	2.08810015147901e-05	7.12945828468697
ENSMUSG00000032560	Dnajc13	2408.39523398219	protein_coding	-0.292024364896084	7.87773656732244	-17.9448955225943	3.95106666508308e-07	1.67219158055044e-05	7.12260286033196
ENSMUSG00000030246	Ldhb	835.330407187912	protein_coding	0.184101433241779	9.34876979588179	19.8316254438431	1.98075496650983e-07	1.01340959725642e-05	7.1200347161655
ENSMUSG00000094472	Gm21897	1295.53	protein_coding	-0.426540824779294	7.90730913471926	-17.9290894629271	3.97514451759623e-07	1.68001571883613e-05	7.10974932166092
ENSMUSG00000069302	Hist1h2ah	205.461	protein_coding	1.57737277744546	8.09213337410152	17.9110273644289	4.00286401882159e-07	1.68698542638948e-05	7.10254439576621
ENSMUSG00000039497	Dse	4019.53	protein_coding	-0.750247002317304	5.72972985810981	-17.1928362814751	5.30644558621216e-07	2.08907830166788e-05	7.09871315019049
ENSMUSG00000064853	Gm23442	49.852	snoRNA	0.903056092166516	5.05167819638761	17.6195026717946	4.48218163399527e-07	1.83744987612447e-05	7.08488689106243
ENSMUSG00000029920	Smarcad1	1723.85030951873	protein_coding	-0.323240813952031	7.7389962421179	-17.7181746271154	4.31298005941785e-07	1.7875963835234e-05	7.07597653662047
ENSMUSG00000022307	Oxr1	4074.72556245833	protein_coding	-0.705323486834221	5.93647756862796	-17.0779158961173	5.55710887816652e-07	2.1546524474842e-05	7.07551755682022
ENSMUSG00000022204	Ngdn	993.532	protein_coding	0.948927409484975	5.86426268118118	17.0836620250177	5.54425964940066e-07	2.1546524474842e-05	7.07178120132126
ENSMUSG00000008036	Ap2s1	450.382497517551	protein_coding	0.775641521877213	5.59207488621258	17.1557703382548	5.38585851198545e-07	2.11278932671868e-05	7.06812381430518
ENSMUSG00000020515	Cnot8	1266.88448508393	protein_coding	-0.402619657893509	7.21594038607164	-17.3406096271474	5.00283362308744e-07	2.00440196720206e-05	7.06659974626658
ENSMUSG00000030122	Ptms	595.576629552896	protein_coding	0.778178035193907	5.94632615029921	17.0156013831144	5.69865466408114e-07	2.19537017949967e-05	7.05270999549855
ENSMUSG00000054405	Dnajc8	850.534648386401	protein_coding	0.339421039177106	7.58511761434293	17.5479460278725	4.60962178032061e-07	1.88199082713117e-05	7.04924213085565
ENSMUSG00000038600	Atp6v0a4	2662.91233783716	protein_coding	-1.8167415825985	3.97492099678348	-22.0982828378968	9.35722544136037e-08	5.89200001580491e-06	7.04765978681941
ENSMUSG00000045005	Fzd5	5956.55728219934	protein_coding	-0.440134703977343	6.85247452543105	-17.105236505712	5.4963169923821e-07	2.14491986109208e-05	7.03904040713371
ENSMUSG00000029304	Spp1	1094.58461110283	protein_coding	-0.297574624813508	8.1897930568669	-18.029440485552	3.8250649032708e-07	1.62696373117056e-05	7.03524225909576
ENSMUSG00000063245	Gm13248	282.218553186302	protein_coding	-0.690758423148099	6.01187852062558	-16.9591019050155	5.83055102841277e-07	2.23187551404809e-05	7.03286102300991
ENSMUSG00000033020	Polr2f	338.642	protein_coding	0.819375875125929	5.70541019583087	17.0172530008334	5.69485046657447e-07	2.19537017949967e-05	7.03129370784388
ENSMUSG00000012535	Tnpo3	2635.89533093796	protein_coding	-0.322817517235555	7.75371753226147	-17.6213807443681	4.47889132801883e-07	1.83744987612447e-05	7.02964079147695
ENSMUSG00000105072	AC122428.1	52.1077	miRNA	0.651230579425048	6.00680697405765	16.9393621622054	5.87745006599852e-07	2.24696561110928e-05	7.02585600856798
ENSMUSG00000025580	Eif4a3	665.567773973886	protein_coding	0.359462782380047	7.52044695055261	17.4266125265864	4.83526613529023e-07	1.95428399953827e-05	7.01735202817092
ENSMUSG00000061315	Naca	923.054361410236	protein_coding	0.360690299307392	7.84413188975512	17.6440870371013	4.43932784353617e-07	1.83348866771509e-05	7.0032458438231
ENSMUSG00000062078	Qk	4768.12585193249	protein_coding	-0.464147392466657	7.23603980131277	-17.1808236518283	5.33203533259879e-07	2.09440953868315e-05	6.9949291492805
ENSMUSG00000022385	Gtse1	2516.53	protein_coding	0.579275544435247	7.00716500140668	17.0032109768956	5.72728619007528e-07	2.20357519494971e-05	6.96671616851225
ENSMUSG00000096188	Cmtm4	7529.53	protein_coding	-0.611957983246401	6.49006677610721	-16.8213321501229	6.16700627264018e-07	2.34276070147364e-05	6.96577217329407
ENSMUSG00000014294	Ndufa2	367.571	protein_coding	1.09526149482563	5.20393455161688	17.145525862775	5.4080452863748e-07	2.11872689452772e-05	6.96548004255278
ENSMUSG00000019189	Rnf145	2254.65277387046	protein_coding	-0.730493131517977	5.65841181266593	-16.8456758110749	6.10597912704647e-07	2.32466474724153e-05	6.95763925603384
ENSMUSG00000047260	Emc6	674.984745042241	protein_coding	0.790368222340057	5.31128461893497	16.9735991888989	5.79637885556709e-07	2.22162484988438e-05	6.94472653807642
ENSMUSG00000101188	Eif4a-ps4	1013.53	processed_pseudogene	0.226695692710122	9.71466094315254	20.0858152003769	1.81366013746697e-07	9.52674232093204e-06	6.94217542716332
ENSMUSG00000095590	Gm24305	59.7804	snRNA	1.07796810386496	8.8584408102296	18.4500386092843	3.262467746718e-07	1.46317877819624e-05	6.93224716830621
ENSMUSG00000067719	Gm10221	129.696	processed_pseudogene	0.864398201527564	5.23398789543844	16.9924290502066	5.75233427666983e-07	2.20755929348214e-05	6.92953774155091
ENSMUSG00000033845	Mrpl15	679.985350640791	protein_coding	0.380141380187696	7.24060950382697	17.0340534258055	5.65631772835256e-07	2.1846618434353e-05	6.9249939701437
ENSMUSG00000021474	Sfxn1	2606.53	protein_coding	-0.557977893208001	6.20124395538906	-16.6803623581318	6.53436792989067e-07	2.45746210169318e-05	6.92193358078972
ENSMUSG00000041801	Phlda3	1159.49180579046	protein_coding	1.07399914797076	4.9546206487501	17.2551516446321	5.17592403709691e-07	2.05186466214677e-05	6.91818560469852
ENSMUSG00000037492	Zmat4	3977.53	protein_coding	-1.28395841727164	4.55322900900722	-18.0743587218612	3.75998723883049e-07	1.60945664586349e-05	6.91594171739959
ENSMUSG00000022450	Ndufa6	355.592	protein_coding	0.652802265677811	6.04553094962537	16.6522508319423	6.61057157817744e-07	2.46759087394601e-05	6.91103858343265
ENSMUSG00000001627	Ifrd1	639.290496365209	protein_coding	-0.838805349175567	5.98298479794451	-16.6529913051369	6.60855139557887e-07	2.46759087394601e-05	6.9084338171936
ENSMUSG00000020954	Strn3	3802.64350252291	protein_coding	-0.556080091401492	6.61581297345235	-16.7133225590488	6.44629196915564e-07	2.43321513661944e-05	6.90699724331051
ENSMUSG00000039329	Tex19.1	1106.35628860457	protein_coding	0.811181893723074	5.66365413204957	16.6950802881036	6.49487051148623e-07	2.44566872180012e-05	6.90221748227565
ENSMUSG00000022843	Clcn2	2107.51176342558	protein_coding	-0.803418332656007	5.33346455066758	-16.858384146849	6.07439407557995e-07	2.31636380173987e-05	6.90097434822198
ENSMUSG00000006360	Crip1	252.36570676179	protein_coding	1.23554466705987	4.67400813420937	17.6358844925726	4.4535738490674e-07	1.83348866771509e-05	6.89417867557739
ENSMUSG00000027452	Acss1	1564.17338165739	protein_coding	-1.19102015444268	5.75041925145206	-16.6687550739815	6.56571057566294e-07	2.4661629636012e-05	6.89115801060352
ENSMUSG00000019989	Enpp3	2610.53	protein_coding	-1.02965636621605	4.71185027330288	-17.517920709081	4.66432184852401e-07	1.89659279061296e-05	6.87753254355595
ENSMUSG00000022672	Prkdc	12300.3218832643	protein_coding	-0.471021791085038	6.77666867625941	-16.6401623731026	6.64365138329771e-07	2.47686203990959e-05	6.85245466893947
ENSMUSG00000062867	Impdh2	799.617104697386	protein_coding	0.242522238152615	8.69711009145821	18.1473466124484	3.65691446012768e-07	1.58338072928497e-05	6.8322675310488
ENSMUSG00000005732	Ranbp1	686.885886492521	protein_coding	0.301230617914385	8.0057942258184	17.3849535739306	4.91562212863627e-07	1.97736987072813e-05	6.82794072886757
ENSMUSG00000022241	Tars	2431.53	protein_coding	-0.235842920120591	8.64712373296299	-18.0517866928776	3.79253058567551e-07	1.61647874565905e-05	6.82436459767421
ENSMUSG00000101588	Gm28265	2114.53	lincRNA	3.22144867582456	3.88005194108098	27.8214179200264	1.88495824618657e-08	1.74818241789075e-06	6.82303658453014
ENSMUSG00000022354	Ndufb9	446.533	protein_coding	0.39664498915952	7.0207454496685	16.6569692238818	6.59771073998533e-07	2.46759087394601e-05	6.81108805661455
ENSMUSG00000027620	Rbm39	994.196417733775	protein_coding	-0.279632483456536	8.52789110657647	-17.8448373996076	4.10634368997518e-07	1.71854486824602e-05	6.79855291034504
ENSMUSG00000020219	Timm13	1020.53	protein_coding	0.800901658426436	5.2139711753214	16.6306119241659	6.66991934429033e-07	2.48280359234186e-05	6.79516025173962
ENSMUSG00000006494	Pdk1	1592.09442812154	protein_coding	-0.406273888239215	7.80714867161664	-17.110785055079	5.48406351690308e-07	2.14292099635138e-05	6.79126946733458
ENSMUSG00000018585	Atox1	336.65	protein_coding	0.753557092875264	5.71689442936501	16.369707842951	7.43541295894959e-07	2.72804302812547e-05	6.77965604852101
ENSMUSG00000048826	Dact2	2603.53	protein_coding	-0.784243332192984	5.28162471135361	-16.5485154904938	6.900666052978e-07	2.55367135746226e-05	6.77503558097392
ENSMUSG00000033326	Kdm4a	3974.06071307907	protein_coding	-0.658919198929792	6.39634711677348	-16.3395377113247	7.53021922397746e-07	2.74606259054974e-05	6.76933201659374
ENSMUSG00000040385	Ppp1ca	1174.53	protein_coding	0.29563976524655	7.88281946393603	17.1409925954552	5.41789634211376e-07	2.1198224893773e-05	6.76835671502336
ENSMUSG00000072772	Grcc10	303.402857783225	protein_coding	0.908816992885106	4.90091525861531	16.8434081283928	6.11163483084564e-07	2.32466474724153e-05	6.76805187351403
ENSMUSG00000047945	Marcksl1	1400.53	protein_coding	0.501513389086981	7.25099184107744	16.6581132829353	6.59459669291095e-07	2.46759087394601e-05	6.75897537815532
ENSMUSG00000041203	2310036O22Rik	686.532	protein_coding	0.852625229746455	6.05783267888518	16.272793501412	7.74488866906512e-07	2.79128864916438e-05	6.75403453610758
ENSMUSG00000076033	Mir692-3	41.9402	miRNA	0.56155551100897	6.28649404627801	16.2880458374817	7.6952247917297e-07	2.78259698876878e-05	6.75262854215316
ENSMUSG00000094403	Mir692-2	41.9402	miRNA	0.56155551100897	6.28649404627801	16.2880458374817	7.6952247917297e-07	2.78259698876878e-05	6.75262854215316
ENSMUSG00000054428	Atpif1	333.427733815026	protein_coding	0.432819345367704	6.86668084768602	16.4523023454155	7.18274802777035e-07	2.65478961237972e-05	6.75179220027142
ENSMUSG00000055093	Gm8430	267.54	processed_pseudogene	0.461981348999357	8.09395656507012	17.2618643475014	5.16208359611309e-07	2.05179166639685e-05	6.74132796258964
ENSMUSG00000002661	Alkbh7	691.52441582068	protein_coding	1.19259544181389	4.52791241793816	17.3806871201393	4.92393724251615e-07	1.97806671390866e-05	6.73952003156853
ENSMUSG00000036752	Tubb4b	1369.28338535555	protein_coding	0.230590211296414	9.03760934982256	18.3876617432021	3.33961634597869e-07	1.48890402938151e-05	6.73637474211359
ENSMUSG00000034192	Lsm3	424.386259809467	protein_coding	0.655767317858295	5.91782019300523	16.2272152529064	7.89548753511857e-07	2.83454605666401e-05	6.7334144195433
ENSMUSG00000055653	Gpc3	2011.53	protein_coding	-1.10543189647132	4.81970635875594	-16.8958985060703	5.98223682900256e-07	2.28411987896694e-05	6.72437492907968
ENSMUSG00000092203	1110038B12Rik	497.829117225966	processed_transcript	0.606178246516243	6.33289337654312	16.1891238949632	8.02391022088867e-07	2.87036283604147e-05	6.70713837448263
ENSMUSG00000002489	Tiam1	2703.82737832769	protein_coding	-0.566916785468377	6.41787394151115	-16.2001127087525	7.98661955926207e-07	2.86042826145728e-05	6.7063669909026
ENSMUSG00000001158	Snrnp27	680.436777587294	protein_coding	0.869193662373626	5.36496738267889	16.3046962384386	7.64142225092215e-07	2.77853564984255e-05	6.70399849897043
ENSMUSG00000023505	Cdca3	709.076170377175	protein_coding	0.716264396056128	6.39403325828004	16.1773673826329	8.06402581606254e-07	2.87444735168284e-05	6.697967205927
ENSMUSG00000021686	Ap3b1	3815.53	protein_coding	-0.462363382587656	6.76037009910773	-16.2764797127687	7.73285244727355e-07	2.79128864916438e-05	6.69551451711892
ENSMUSG00000022234	Cct5	1420.53102715346	protein_coding	-0.126746512280928	9.41582480250644	-18.8871179215771	2.77547228030916e-07	1.29503364209643e-05	6.69521969255315
ENSMUSG00000025428	Atp5a1	1142.27062464419	protein_coding	0.0809784063980032	9.92343634083752	19.9222645958991	1.91923618536176e-07	9.89213175539201e-06	6.69473175464686
ENSMUSG00000061175	Fnip2	5438.88044637032	protein_coding	-0.496960531287431	6.84176376524268	-16.30214943944	7.64962391450162e-07	2.77853564984255e-05	6.6936013601383
ENSMUSG00000095661	Gm8935	2280.7451082228	transcribed_processed_pseudogene	-0.622509474226606	6.1125820140783	-16.110958371332	8.2949618393557e-07	2.93920908625464e-05	6.68499830186863
ENSMUSG00000040945	Rcc2	1443.91617382456	protein_coding	-0.141783788513939	9.16527433698407	-18.4420973237096	3.2721759091746e-07	1.46317877819624e-05	6.68190528714659
ENSMUSG00000069833	Ahnak	15524.2006176334	protein_coding	-0.429920066393209	7.51794281790089	-16.6283661601514	6.67611335689116e-07	2.48280359234186e-05	6.67336732167047
ENSMUSG00000029649	Pomp	253.284691615461	protein_coding	0.524183899424361	6.37355293839515	16.1082898261786	8.30439786425567e-07	2.93920908625464e-05	6.66823995904477
ENSMUSG00000032299	Commd4	619.532	protein_coding	0.793117691434493	5.23233207459409	16.2692686666888	7.75641792423128e-07	2.79128864916438e-05	6.66469823821196
ENSMUSG00000095403	Gm21092	3717.81372730053	protein_coding	-0.481466268122296	7.18235421412583	-16.398584128045	7.34594384327566e-07	2.69851181597299e-05	6.66423421744677
ENSMUSG00000021908	Gm6768	3134.53	protein_coding	-0.425534009596869	7.09194633552525	-16.3529219336607	7.48799190743179e-07	2.73730740664742e-05	6.66398444950849
ENSMUSG00000034453	Polr3b	4624.53	protein_coding	-0.502928434387299	6.59388273284664	-16.1448658316164	8.17612158767061e-07	2.90406947503445e-05	6.66215704118817
ENSMUSG00000015092	Edf1	285.872451438058	protein_coding	0.771644775885632	5.85613717258849	16.0595015464388	8.4790874924336e-07	2.98696483071673e-05	6.66110949144545
ENSMUSG00000021728	Emb	2048.53	protein_coding	-0.641001071487969	6.06103028814816	-16.0235867658043	8.61035850863987e-07	3.00851933518744e-05	6.64856675455885
ENSMUSG00000030796	Tead2	468.374388127795	protein_coding	0.474668990063023	6.54085302693465	16.0990636865387	8.33711598804823e-07	2.94731762735131e-05	6.6461727770835
ENSMUSG00000074698	Csnk2a1	2274.71135942092	protein_coding	-0.237737812481109	8.47411815839021	-17.4355171118285	4.81828484325021e-07	1.95127548860951e-05	6.64452517155448
ENSMUSG00000031835	Mbtps1	4027.80227001539	protein_coding	-0.373634131446154	7.56765850801252	-16.5908921219766	6.78044302169468e-07	2.51434087353266e-05	6.63900990858585
ENSMUSG00000031575	Ash2l	1172.15032988027	protein_coding	-0.334630489670024	8.65128119335414	-17.6115918402867	4.49607135309137e-07	1.84063280775262e-05	6.63613158911928
ENSMUSG00000021957	Tkt	1258.98618196065	protein_coding	-0.218024912234048	8.46708755809118	-17.4089474729867	4.86915609926425e-07	1.96393653190324e-05	6.63546463809483
ENSMUSG00000024856	Cdk2ap2	646.392349379728	protein_coding	0.985016363275522	5.03939563645154	16.3282169655413	7.56614807331732e-07	2.75582040551651e-05	6.6293120281946
ENSMUSG00000028435	Aqp3	815.662649671578	protein_coding	0.960292886220747	5.45535073323749	16.0505590869497	8.51155841502975e-07	2.99489249195819e-05	6.61777126360913
ENSMUSG00000004285	Atp6v1f	498.88971649334	protein_coding	0.772900209014025	5.96273982728851	15.943036801851	8.91327838516905e-07	3.07856439305684e-05	6.61437982612238
ENSMUSG00000028484	Psip1	1910.17631168654	protein_coding	-0.404739655517079	7.95047903796925	-16.8139761756731	6.18558345663223e-07	2.3468509758629e-05	6.60477927685661
ENSMUSG00000029512	Ulk1	2509.36415917691	protein_coding	0.4955678088282	6.38130869384439	15.9646639346258	8.83077109017041e-07	3.05709493650381e-05	6.60426737312711
ENSMUSG00000040785	Ttc3	2419.82921280426	protein_coding	-0.525935966449226	6.79694437602443	-16.0813269038193	8.40042817478267e-07	2.96620994387831e-05	6.60329999239445
ENSMUSG00000063800	Prpf38a	1351.65298742163	protein_coding	0.613946360794031	5.83409905410381	15.9222145103413	8.99354565989836e-07	3.09207155073553e-05	6.60321544014585
ENSMUSG00000024048	Myl12a	671.853379615332	protein_coding	0.526827764860766	6.9664012527736	16.1552195979787	8.14022061170717e-07	2.89473951670046e-05	6.60044897720875
ENSMUSG00000032712	2810474O19Rik	3001.62081701064	protein_coding	-0.330051227737402	7.46266788672417	-16.4351867830384	7.23429254352491e-07	2.66840256931776e-05	6.59991246101734
ENSMUSG00000022551	Cyc1	989.532	protein_coding	0.377438120190455	7.41773467887178	16.3580710426136	7.47181832153934e-07	2.73730740664742e-05	6.5750575823079
ENSMUSG00000035293	G2e3	3212.8269939956	protein_coding	-0.608072969401533	6.4131701962347	-15.8899715281987	9.1194679163299e-07	3.12108076785646e-05	6.57092719860931
ENSMUSG00000106044	Gm42860	3786.53	TEC	-0.60414383088459	7.08809407469164	-16.1331654954289	8.21690891907869e-07	2.91511093399522e-05	6.56979342605227
ENSMUSG00000071662	Polr2g	663.532	protein_coding	0.677248668015351	5.53780242766235	15.893606786334	9.10517076534675e-07	3.1197408931346e-05	6.56948961294891
ENSMUSG00000039000	Ube3c	4775.68554933979	protein_coding	-0.468275995872857	7.17027676178739	-16.1833742323493	8.04350076448539e-07	2.8705362763898e-05	6.56935738904328
ENSMUSG00000041126	H2afv	515.455698242172	protein_coding	0.417630012532632	6.86347736451234	16.0363330676698	8.56350672406343e-07	3.00262326197645e-05	6.56597292766671
ENSMUSG00000021595	Nsun2	1335.7406513634	protein_coding	-0.325877829362867	8.28042444544342	-17.034302186227	5.65574941785327e-07	2.1846618434353e-05	6.56118341047559
ENSMUSG00000065773	Rnu1b6	60.4719	snRNA	1.06667489492214	6.20393088641061	15.826971039311	9.37134964259185e-07	3.18551680328328e-05	6.56024323239375
ENSMUSG00000095701	Gm24830	60.4719	snRNA	1.06667489492214	6.20393088641061	15.826971039311	9.37134964259185e-07	3.18551680328328e-05	6.56024323239375
ENSMUSG00000096838	Gm26232	60.4719	snRNA	1.06667489492214	6.20393088641061	15.826971039311	9.37134964259185e-07	3.18551680328328e-05	6.56024323239375
ENSMUSG00000088835	Gm23547	106.518	snoRNA	1.1803520618991	4.28374090580802	17.2742202849084	5.13671786469022e-07	2.04712513416547e-05	6.55440966277635
ENSMUSG00000041075	Fzd7	4327.53	protein_coding	-0.580997560293181	6.28578046743976	-15.8038556474228	9.46574666229153e-07	3.20681070152725e-05	6.54319595266802
ENSMUSG00000046572	Zfp518b	3983.1346705898	protein_coding	-0.518916358110575	6.78138420864152	-15.9308465335461	8.96017083626136e-07	3.09120750239745e-05	6.53774270740405
ENSMUSG00000049091	Sephs2	1972.53	protein_coding	-0.319968816639412	7.46809171647436	-16.2997632826814	7.65731734749339e-07	2.77853564984255e-05	6.53610121257928
ENSMUSG00000071172	Srsf3	1358.43611191834	protein_coding	-0.226922701866151	8.57849989609047	-17.3008598395018	5.08251067884013e-07	2.0309090876126e-05	6.53141303182166
ENSMUSG00000027342	Pcna	1088.41033048919	protein_coding	0.40974379946996	7.56512239337273	16.3540427779812	7.48446789187288e-07	2.73730740664742e-05	6.52762571139542
ENSMUSG00000053062	Jam2	1455.24729281368	protein_coding	-0.410276083383782	7.31458643365471	-16.1642124053065	8.10918430285129e-07	2.88711942081017e-05	6.52110295649095
ENSMUSG00000028029	Aimp1	676.860283233111	protein_coding	0.461263805038782	6.66068421498175	15.8523172865679	9.26907238020856e-07	3.16507222673735e-05	6.51849761533394
ENSMUSG00000022962	Gart	2652.61303571664	protein_coding	-0.257276502818348	8.58921247643669	-17.2811939516543	5.12246420305435e-07	2.04415573489482e-05	6.51814482304109
ENSMUSG00000024754	Tmem2	6416.4717880351	protein_coding	-0.546083663309313	6.17527546182641	-15.7271786384239	9.78671645010756e-07	3.29318076830103e-05	6.51592210517158
ENSMUSG00000067148	Polr1c	461.981593787083	protein_coding	0.445717469415546	6.80550422641553	15.9007883092912	9.07700142281502e-07	3.1136394492485e-05	6.51556988850872
ENSMUSG00000024960	Plcb3	3996.53	protein_coding	-0.548849163221112	6.62356245843565	-15.8118137944492	9.43312604882536e-07	3.20289270780964e-05	6.50951373502865
ENSMUSG00000021243	Fcf1	528.214317715052	protein_coding	0.62394542661524	5.93913962370038	15.6936806608602	9.93081560758572e-07	3.33048078339669e-05	6.50714710528779
ENSMUSG00000033047	Eif3l	1688.53	protein_coding	0.237871872724465	8.35737103608885	16.9969386965276	5.74184251730073e-07	2.20635071358529e-05	6.49957856393264
ENSMUSG00000050071	Bex1	658.020708078616	protein_coding	0.568144809744132	6.90298877810214	15.9018968399076	9.07266208752964e-07	3.1136394492485e-05	6.49872509127613
ENSMUSG00000028431	Ikbkap	3726.7153056495	protein_coding	-0.458345454472991	7.06507420989222	-15.9660550956183	8.82549366984522e-07	3.05709493650381e-05	6.49469885563728
ENSMUSG00000016664	Pacsin2	3179.93759635494	protein_coding	-0.553037068987142	6.50913453278172	-15.7392988257442	9.73516643699847e-07	3.28318761240591e-05	6.49212214291584
ENSMUSG00000051285	Pcmtd1	2307.66784683588	protein_coding	-0.676322587415242	6.58767468978226	-15.7281199570028	9.78270168608072e-07	3.29318076830103e-05	6.47872807327503
ENSMUSG00000097230	Gm26853	3805.53	lincRNA	-0.705080917941586	5.73374629644215	-15.6397409492188	1.01679567239675e-06	3.391086921182e-05	6.47763770570272
ENSMUSG00000036427	Gpi1	1023.69049191969	protein_coding	-0.431148310462879	8.04007658513792	-16.5964137531044	6.76495448595475e-07	2.51273321815148e-05	6.47088675525334
ENSMUSG00000018796	Acsl1	1880.90836645664	protein_coding	-0.800032860985667	5.43439669256353	-15.6791212842191	9.99419818477507e-07	3.34427239704127e-05	6.46368133442587
ENSMUSG00000021794	Glud1	1646.47352165378	protein_coding	-0.332421986215682	8.54829536773017	-17.0979232424757	5.51251536019284e-07	2.14845102540123e-05	6.46086411364301
ENSMUSG00000081087	Rps15a-ps7	193.957	processed_pseudogene	0.377956931182226	7.61500029401252	16.2390561363752	7.85604486068477e-07	2.82375947390809e-05	6.45727861339487
ENSMUSG00000015880	Ncapg	2896.05834057792	protein_coding	-0.379666223753771	7.14632296191535	-15.9273408874737	8.97370801558265e-07	3.09207155073553e-05	6.45548154764581
ENSMUSG00000026491	Ahctf1	4048.78344654841	protein_coding	-0.254406744491394	8.06110557904087	-16.5889082879765	6.78601766592894e-07	2.51434087353266e-05	6.45159734244087
ENSMUSG00000064513	Gm22457	49.5319	snoRNA	1.33881659860834	4.2316307029566	17.080220273246	5.55195186590701e-07	2.1546524474842e-05	6.44043859986796
ENSMUSG00000024829	Mrpl21	492.593000034858	protein_coding	0.608632896764584	5.96577084368823	15.5217021985561	1.07097475700018e-06	3.50873575170002e-05	6.4317401154274
ENSMUSG00000074884	Serf2	489.084719071109	protein_coding	0.687541857229072	7.01959126950479	15.8037917352196	9.46600915922219e-07	3.20681070152725e-05	6.4303952999944
ENSMUSG00000078348	Sf3b5	3636.53	protein_coding	0.643583366290597	5.81777147984741	15.5196986458263	1.07192233354209e-06	3.50873575170002e-05	6.43036408504694
ENSMUSG00000038733	Wdr26	2321.7546747004	protein_coding	-0.575264472892423	6.29049632029893	-15.5471333057037	1.05902967412435e-06	3.48197965217586e-05	6.42802776268334
ENSMUSG00000027660	Skil	3919.85753592706	protein_coding	-0.468679515723458	6.616177579499	-15.6301576257366	1.02107601527532e-06	3.40158682738449e-05	6.4264509629403
ENSMUSG00000068036	Mllt4	2640.82129651962	protein_coding	-0.307215297058418	7.75535123207201	-16.2703433443023	7.75290072978741e-07	2.79128864916438e-05	6.42566173604803
ENSMUSG00000078937	Cpt1b	1159.96537930967	protein_coding	-0.96047738935837	4.8143245460955	-15.9656251930878	8.82712413732545e-07	3.05709493650381e-05	6.41216509168565
ENSMUSG00000017861	Mybl2	1349.1592421226	protein_coding	-0.170145153329605	9.55375032902399	-18.4453413399983	3.26820615120244e-07	1.46317877819624e-05	6.40978360947679
ENSMUSG00000040888	Gfer	1570.53	protein_coding	0.758700335293145	5.4029089442895	15.5444731758067	1.06027201628703e-06	3.48197965217586e-05	6.40845897012432
ENSMUSG00000037400	Atp11b	2680.11371103975	protein_coding	-0.729792839190138	6.24140962824438	-15.484382297245	1.08878285601051e-06	3.55028115835842e-05	6.4049165716418
ENSMUSG00000065999	Gm13154	1761.09837748613	protein_coding	-0.551248095179273	6.168229611648	-15.4659185676058	1.09771778148776e-06	3.57370765069617e-05	6.39992401830158
ENSMUSG00000022698	Naa50	2878.67060541414	protein_coding	-0.401707297635338	6.97883695948755	-15.7185131376898	9.82376344763846e-07	3.3019493046766e-05	6.39846690033845
ENSMUSG00000023972	Ptk7	4050.53	protein_coding	-0.541865002424406	6.50775431147812	-15.5299764014402	1.06707157769235e-06	3.50048404345822e-05	6.39665299337816
ENSMUSG00000029038	Ssu72	867.471530450593	protein_coding	0.5198177861575	6.30837335897001	15.4852320470071	1.08837364459502e-06	3.55028115835842e-05	6.39629724960293
ENSMUSG00000001403	Ube2c	763.373759529489	protein_coding	0.452045057135748	6.57463710094521	15.5534421926205	1.05608989937383e-06	3.47965409937325e-05	6.39480383478449
ENSMUSG00000035674	Ndufa3	161.010772867038	protein_coding	0.944808089959388	4.7243352989354	15.9459826470489	8.90198853604543e-07	3.07820314752162e-05	6.38506222658697
ENSMUSG00000040717	Il17rd	8015.53	protein_coding	-0.535328133327969	6.63849598222883	-15.5450336219018	1.0600101370864e-06	3.48197965217586e-05	6.38473379277243
ENSMUSG00000026966	Ssna1	662.263603005449	protein_coding	0.944176280126579	5.01938085624202	15.6797462026283	9.99146823099714e-07	3.34427239704127e-05	6.38193688491858
ENSMUSG00000018446	C1qbp	969.305049629576	protein_coding	0.444491420927943	6.69953621389187	15.5571828595304	1.05435123575133e-06	3.4778990700875e-05	6.37631243665667
ENSMUSG00000025607	Copg2	2705.25472418241	protein_coding	-0.45448074858933	6.7871848163461	-15.5821147863667	1.04284577197172e-06	3.45877181037288e-05	6.37511841515095
ENSMUSG00000002658	Gtf2f1	1512.53	protein_coding	0.573820465773575	6.28553950587844	15.4185664212697	1.12101645451366e-06	3.62989476742252e-05	6.36838212080357
ENSMUSG00000010755	Cars	1270.02456657615	protein_coding	-0.280056889074881	8.0712145692031	-16.4159218367528	7.29281474734837e-07	2.68556115616509e-05	6.36817609777562
ENSMUSG00000031827	Cotl1	1423.53	protein_coding	0.54651571541375	6.18037255046446	15.3996920825883	1.13045974401767e-06	3.64476232274538e-05	6.36803148960501
ENSMUSG00000024181	Mrpl28	549.617234666236	protein_coding	0.483306229134481	6.42403453179419	15.4456970322074	1.10759926678247e-06	3.59419550405469e-05	6.36563635975107
ENSMUSG00000038991	Txndc5	2443.78264568028	protein_coding	-0.690202348761979	6.31939134438442	-15.4125669374491	1.12400837010407e-06	3.63175564658678e-05	6.36563360565528
ENSMUSG00000038299	Wdr36	2840.14528705784	protein_coding	-0.35642646204101	7.35131859065886	-15.845425317012	9.29675649552855e-07	3.17092208778816e-05	6.36089331726039
ENSMUSG00000025453	Nnt	3227.95859566688	protein_coding	-0.715718177892384	5.44261280243892	-15.4129968621137	1.12379366645008e-06	3.63175564658678e-05	6.35616951891077
ENSMUSG00000060081	Hist1h2aa	192.216	protein_coding	2.77513736274298	3.52205559659748	25.677739107786	3.29549515444764e-08	2.59911637522302e-06	6.35535950198492
ENSMUSG00000022464	Slc38a4	2613.62730101427	protein_coding	-0.405657182365919	7.72912585252591	-16.0702498238146	8.44024599706301e-07	2.97677173668716e-05	6.34491001427106
ENSMUSG00000095588	Gm12350	258.815	processed_pseudogene	0.666715717716722	5.55708107249751	15.3425624856835	1.1595997170452e-06	3.71876327614634e-05	6.34077497222277
ENSMUSG00000039130	Zc3hc1	865.797495254373	protein_coding	0.604993191923382	6.89837237870764	15.5570782128783	1.05439983122557e-06	3.4778990700875e-05	6.34020076032236
ENSMUSG00000009549	Srp14	559.904439763598	protein_coding	0.611640070170198	5.70941404315472	15.3065031132339	1.17843249332884e-06	3.77512984989748e-05	6.33433524440374
ENSMUSG00000027547	Sall4	1731.25684004642	protein_coding	0.280690986177768	7.90532683776981	16.2073032671445	7.96232515939653e-07	2.85513017559315e-05	6.33381039048595
ENSMUSG00000036986	Pml	1452.04547279594	protein_coding	0.461895491257352	6.6851583692656	15.4549450982098	1.10306757968624e-06	3.58723784653592e-05	6.33135794547929
ENSMUSG00000017776	Crk	2146.83132582302	protein_coding	-0.506105152063904	6.82843915546307	-15.4524217809038	1.10430194426377e-06	3.5873696349386e-05	6.3074465207058
ENSMUSG00000027193	Api5	2879.12491223116	protein_coding	-0.28537668002717	7.75494288651378	-16.0060626173961	8.67524964375055e-07	3.0276722014525e-05	6.30128694294138
ENSMUSG00000059995	Atxn7l3	3394.70697601406	protein_coding	-0.523574110194857	6.4789184537291	-15.3031637474065	1.18019409539343e-06	3.77522489525244e-05	6.29528765480493
ENSMUSG00000041264	Uspl1	2905.90454777822	protein_coding	-0.488181752189924	6.50662055781319	-15.301685484023	1.18097487488346e-06	3.77522489525244e-05	6.29045344520653
ENSMUSG00000019823	Mical1	2308.37978458956	protein_coding	-0.920640265158362	4.98278316174411	-15.4832249323276	1.0893404865408e-06	3.55028115835842e-05	6.28829290408849
ENSMUSG00000002635	Pdcd2l	455.898533730249	protein_coding	0.629481527011194	6.00147086013615	15.1935040466417	1.23974284305035e-06	3.90902756461908e-05	6.28419461309335
ENSMUSG00000040943	Tet2	2846.67440028135	protein_coding	-0.289944274526007	7.71375837508678	-15.9239660484211	8.98676208659728e-07	3.09207155073553e-05	6.2775633956652
ENSMUSG00000030335	Mrpl51	589.98316612714	protein_coding	0.814527053456239	5.68024768484496	15.1649965642712	1.2557786499576e-06	3.94716450340751e-05	6.27027739644032
ENSMUSG00000054408	Spcs3	3261.53	protein_coding	-0.659892983664903	6.31505786180026	-15.2044260451884	1.23366095160301e-06	3.8980313285719e-05	6.26996615612489
ENSMUSG00000022752	Tomm70a	3573.53	protein_coding	-0.275004143495638	8.26207510373623	-16.3448470565435	7.51343582909574e-07	2.74327136365125e-05	6.25044765501475
ENSMUSG00000042988	Notum	1197.34830271333	protein_coding	-1.06895351696465	4.39277248739204	-16.0461104302532	8.52776464488303e-07	2.99708537794258e-05	6.23694480507963
ENSMUSG00000065343	Gm25580	142.095	misc_RNA	1.76318122584499	4.17305013780236	16.7682559045397	6.30248761810345e-07	2.38218176649548e-05	6.23647488505596
ENSMUSG00000050244	Heatr1	6332.53	protein_coding	-0.238764935653139	8.24517597611605	-16.2972284292488	7.66549986262264e-07	2.77853564984255e-05	6.23454570609619
ENSMUSG00000029174	Tbc1d1	3979.53675476928	protein_coding	-0.600026112248053	6.28161039080077	-15.1168748590339	1.28338642841415e-06	4.02132208419362e-05	6.23177049290131
ENSMUSG00000037656	Slc20a2	3444.53	protein_coding	-0.673221297503658	5.60075283410638	-15.0781855012237	1.30608448960784e-06	4.07544473813354e-05	6.22753190374656
ENSMUSG00000069020	Urm1	970.031910503422	protein_coding	0.807490436446516	5.4311198082	15.0950623502323	1.29612754122647e-06	4.05279255840939e-05	6.22167303322162
ENSMUSG00000025278	Flnb	8895.53	protein_coding	-0.401632752551133	7.39924584831751	-15.5726879499398	1.0471791319401e-06	3.465494023752e-05	6.21796283796473
ENSMUSG00000059552	Trp53	1434.53332988554	protein_coding	0.5422558317323	7.0001690501362	15.3443047882123	1.15869847797446e-06	3.71876327614634e-05	6.21523762868497
ENSMUSG00000021488	Nsd1	12579.5	protein_coding	-0.27792177275148	8.62419681624292	-16.6530806584016	6.60830766670451e-07	2.46759087394601e-05	6.21474687068762
ENSMUSG00000029177	Cenpa	598.815351605003	protein_coding	0.455057711741451	6.58542572083123	15.1656977516617	1.25538140166882e-06	3.94716450340751e-05	6.21178967043663
ENSMUSG00000033991	Ttc37	5176.53	protein_coding	-0.57497125326491	6.17501876208497	-15.0492896869175	1.32333521049232e-06	4.10794418802517e-05	6.20925790463085
ENSMUSG00000019943	Atp2b1	6925.53	protein_coding	-0.575898826280103	6.42721341159694	-15.0901678655126	1.29900624896591e-06	4.05757159825122e-05	6.20288142155959
ENSMUSG00000032612	Usp4	2177.28489898317	protein_coding	-0.563865518716073	6.29392757227941	-15.0432710217194	1.32696089110319e-06	4.11494817510421e-05	6.19586883260643
ENSMUSG00000027163	Commd9	781.636668697868	protein_coding	1.18166010398991	4.31035509578973	16.0248474818043	8.60571148932448e-07	3.00851933518744e-05	6.19458528446133
ENSMUSG00000028066	Pmf1	702.022355659279	protein_coding	0.606215620841653	6.02733564875027	14.9953276956348	1.35624951320053e-06	4.17080541975207e-05	6.19240833658726
ENSMUSG00000031697	Orc6	1445.18451856727	protein_coding	0.540328916002427	6.10232236216585	14.9987558442374	1.35413099457915e-06	4.17080541975207e-05	6.18937486781778
ENSMUSG00000004364	Cul3	1175.50537493348	protein_coding	-0.391215985194186	6.88675523565051	-15.2334605133316	1.21765765916925e-06	3.86371647311265e-05	6.18899435445045
ENSMUSG00000057738	Sptan1	4711.19321440857	protein_coding	-0.22747904301543	9.0167179380403	-17.0863282325557	5.53830909753473e-07	2.1546524474842e-05	6.18611810161613
ENSMUSG00000028998	Tomm7	920.532	protein_coding	0.776394144176124	5.35322714281275	15.0311489136857	1.33429770085655e-06	4.13343418691118e-05	6.18582802957479
ENSMUSG00000038301	Snx10	903.831281273599	protein_coding	-0.576116017960557	6.23568272619645	-14.9911225148229	1.35885337480025e-06	4.17080541975207e-05	6.17714016413048
ENSMUSG00000079478	Sssca1	582.51966580601	protein_coding	0.855415358216705	4.94132782027076	15.1973574035316	1.23759322081287e-06	3.90634860212247e-05	6.17559414514665
ENSMUSG00000034160	Ogt	3639.00666120216	protein_coding	-0.302828344266284	7.92411703098082	-15.8735266214009	9.18446452605715e-07	3.13974942597829e-05	6.17363876482665
ENSMUSG00000037204	Atg101	1025.53	protein_coding	0.729686269501627	5.54282142441788	14.9574946081561	1.379881827235e-06	4.22241028783955e-05	6.17186134903946
ENSMUSG00000064317	Gm10146	245.369	protein_coding	0.70013424556906	5.34964040523689	14.9927479008139	1.35784625639505e-06	4.17080541975207e-05	6.16978227363105
ENSMUSG00000046432	Ngfrap1	578.648888102018	protein_coding	0.439799312717149	6.84579768831438	15.1692099340275	1.25339377365853e-06	3.94716450340751e-05	6.16442647128276
ENSMUSG00000001025	S100a6	249.786144955135	protein_coding	2.29538362035806	3.53470291739271	20.8658620337288	1.39304970009442e-07	7.91938460283432e-06	6.15829414618561
ENSMUSG00000024376	Epb41l4a	3648.53	protein_coding	-0.648021563818525	5.5569256655976	-14.9239346470088	1.40123789323568e-06	4.27036485333053e-05	6.15705297939371
ENSMUSG00000027010	Slc25a12	1483.86379404191	protein_coding	-0.805937864675966	5.20145235883004	-15.0143029362496	1.34457040255654e-06	4.15241480230436e-05	6.15167312832696
ENSMUSG00000042462	Dctpp1	471.532	protein_coding	0.518476200709918	6.84894806086548	15.1351588407447	1.27281617384404e-06	3.99653638535417e-05	6.14848831616556
ENSMUSG00000020485	Supt4a	512.802971520065	protein_coding	0.756177187040445	5.3671505217206	14.9367225085045	1.39305620450335e-06	4.25165676255404e-05	6.14700903659413
ENSMUSG00000104623	Gm6394	273.387	processed_pseudogene	0.474209473361957	7.01006302436841	15.2088570391866	1.23120325314238e-06	3.89436068986058e-05	6.14656609189611
ENSMUSG00000020526	Znhit3	649.457526889755	protein_coding	0.851826884495878	5.0159023674772	15.0700507183517	1.31091490394281e-06	4.08203958016347e-05	6.14237368050062
ENSMUSG00000007338	Mrpl49	1517.53	protein_coding	0.607024766450938	5.73233393938609	14.8554361240584	1.44600554098319e-06	4.38014319566573e-05	6.13393925524521
ENSMUSG00000081179	Gm13136	2745.53	processed_pseudogene	-1.78242016352143	3.62974312890033	-19.0094764696053	2.65437947066944e-07	1.26204823914788e-05	6.12884920470266
ENSMUSG00000003316	Glg1	5260.3310782104	protein_coding	-0.629304387726341	6.15964208896207	-14.8723355963772	1.43481136125267e-06	4.35501480750319e-05	6.12827936732748
ENSMUSG00000070343	Gm10288	332.667	processed_pseudogene	0.311923708691138	8.18763762318611	16.0013906162885	8.69264376639198e-07	3.03022334728901e-05	6.11676222701663
ENSMUSG00000067919	Rex2	3788.53	protein_coding	-0.643340691957174	7.32541692940757	-15.293385299881	1.18536974817772e-06	3.7852471374062e-05	6.1134339768083
ENSMUSG00000018565	Elp5	532.867970249151	protein_coding	0.594243024595862	5.74780610660205	14.799971603721	1.48344977564926e-06	4.47103132482293e-05	6.1088201976681
ENSMUSG00000034042	Gpbp1l1	1692.00263162344	protein_coding	-0.357388536914072	7.21643651346042	-15.2294806045195	1.21983727429773e-06	3.86654960499709e-05	6.10441687974727
ENSMUSG00000039509	Nup133	5603.53	protein_coding	-0.387287422235269	7.23177529804463	-15.2230910527067	1.22334583782129e-06	3.87358472926153e-05	6.09770640545583
ENSMUSG00000062444	Ap3b2	2966.25011817806	protein_coding	-1.4070688541504	3.95458542929519	-16.7795493634595	6.27337853189582e-07	2.37416563608234e-05	6.09124321393844
ENSMUSG00000033307	Mif	349.607	protein_coding	0.35639611800856	8.42785720981137	16.1840186608004	8.04130232657739e-07	2.8705362763898e-05	6.09066410380401
ENSMUSG00000026229	Psmd1	2860.50583635853	protein_coding	-0.316128831587542	7.93452510012335	-15.7074590514344	9.87125420456272e-07	3.31420466584252e-05	6.08983257909072
ENSMUSG00000024151	Msh2	1559.16199506695	protein_coding	-0.228578836280347	8.30485488874264	-16.0420985913697	8.54240971048588e-07	2.99872510970082e-05	6.08545010047814
ENSMUSG00000083833	Gm13841	279.254	processed_pseudogene	0.302749895312797	7.805713987245	15.5935570270921	1.03761337093536e-06	3.44522035173885e-05	6.08008756613287
ENSMUSG00000094497	Gm8210	279.254	processed_pseudogene	0.302749895312797	7.805713987245	15.5935570270921	1.03761337093536e-06	3.44522035173885e-05	6.08008756613287
ENSMUSG00000041355	Ssr2	574.230059023198	protein_coding	0.366513275922891	7.55853433187924	15.401129506936	1.12973738808225e-06	3.64476232274538e-05	6.07757536974615
ENSMUSG00000036737	Oxsr1	2929.98007384616	protein_coding	-0.408541090151758	6.87226284915972	-14.9934192747044	1.35743050904641e-06	4.17080541975207e-05	6.07636811828048
ENSMUSG00000036825	Ssx2ip	2265.13727887844	protein_coding	-0.739650483099934	5.26557235741238	-14.7842800915393	1.49424258786216e-06	4.49004955226702e-05	6.06527469875571
ENSMUSG00000081058	Hist2h3c2	815.532	protein_coding	0.846447330156362	5.22379587170849	14.7878545690812	1.49177617966426e-06	4.48712536764076e-05	6.06277483362748
ENSMUSG00000037364	Srrt	1027.68840337579	protein_coding	-0.447203419063539	7.0739639447623	-15.0519253569346	1.32175101841686e-06	4.10726952972163e-05	6.05798236899737
ENSMUSG00000064899	Snord118	50.1726	snoRNA	1.18107354467413	4.10386833874853	15.9780462097878	8.78015354072338e-07	3.05709493650381e-05	6.05005013400268
ENSMUSG00000020184	Mdm2	1490.86266506091	protein_coding	0.427794568661923	6.6939803441168	14.8646448314131	1.43989343327938e-06	4.36603004809405e-05	6.04741348543308
ENSMUSG00000031029	Eif3f	1103.30708570366	protein_coding	0.312674005985165	7.79468284431313	15.4857985454245	1.08810093495709e-06	3.55028115835842e-05	6.03192252019502
ENSMUSG00000028811	Yars	1409.89323063195	protein_coding	-0.283357988770239	7.91803659530578	-15.575261551519	1.04599405882077e-06	3.4653886960866e-05	6.0312779044916
ENSMUSG00000010376	Nedd8	378.81018807873	protein_coding	0.795324138034255	6.09346983677696	14.6566751869396	1.58540750479842e-06	4.73557754589341e-05	6.03085931180386
ENSMUSG00000018501	Ncor1	1643.16310396818	protein_coding	-0.297510021159328	7.49179697511008	-15.2449515176532	1.21138939847278e-06	3.85196190843478e-05	6.02642490027208
ENSMUSG00000024096	Ralbp1	3601.44417625523	protein_coding	-0.370296294031861	6.9279544095207	-14.9077083463265	1.41169835473042e-06	4.29788488969548e-05	6.02101549829828
ENSMUSG00000061517	Sox21	3594.53	protein_coding	1.57231324926588	3.85997853327984	16.7839803845934	6.26199935437948e-07	2.37284764942937e-05	6.02045852557309
ENSMUSG00000052337	Immt	1319.43583334367	protein_coding	-0.3656428333296	7.12728032843896	-14.9980540740622	1.35456436591553e-06	4.17080541975207e-05	6.01548009264369
ENSMUSG00000084350	Znf41-ps	2208.53	unprocessed_pseudogene	-3.0884313545915	3.91011337911618	-19.8931978713239	1.93872397171519e-07	9.97546517569686e-06	6.01533877584789
ENSMUSG00000024914	Drap1	551.954519443493	protein_coding	0.642557811960313	5.67830029740405	14.553609999536	1.66367806412066e-06	4.90597273295012e-05	5.99486123106692
ENSMUSG00000032212	Sltm	3441.53	protein_coding	-0.471525738597364	6.33521852890428	-14.6148416694413	1.61666046074086e-06	4.8002994253757e-05	5.98572758259455
ENSMUSG00000028010	Gar1	354.51139714302	protein_coding	0.739428269896901	5.19957731399257	14.5896230759546	1.63583931292373e-06	4.8428901984281e-05	5.97514522813426
ENSMUSG00000031548	Sfrp1	4167.53	protein_coding	-1.13617053766213	4.87048337199051	-14.7944296443212	1.48725143498226e-06	4.47799783264349e-05	5.9724936179303
ENSMUSG00000023010	Tmbim6	1450.46558409126	protein_coding	-0.27933106775751	7.65805271203863	-15.2530822847441	1.20697631480624e-06	3.84199483936575e-05	5.97233814951951
ENSMUSG00000027613	Eif6	405.794478746335	protein_coding	0.428943348351898	7.01029455166316	14.8506732602911	1.44917838716029e-06	4.38533346986702e-05	5.97030620505312
ENSMUSG00000021756	Il6st	2663.95872710364	protein_coding	-0.482951822918137	6.89587836635945	-14.7738709679432	1.50145141800072e-06	4.50270595404229e-05	5.96467043267281
ENSMUSG00000058761	Rnf169	6544.82970438228	protein_coding	0.559489040381916	5.85833285243007	14.4738580560329	1.72726843870525e-06	5.04889973877958e-05	5.95545250713307
ENSMUSG00000068120	Gm10231	238.715	processed_pseudogene	0.588827768972944	5.8551670150451	14.4604058555119	1.73826501765983e-06	5.06651840273933e-05	5.94924816400301
ENSMUSG00000024242	Map4k3	4020.53000439142	protein_coding	-0.546179079806309	6.38047929440444	-14.5491581261136	1.66715674066069e-06	4.91141106863854e-05	5.94874128049402
ENSMUSG00000027364	Usp50	196.622944323352	protein_coding	1.06178679782815	4.2493191111939	15.3431499466929	1.15929575252893e-06	3.71876327614634e-05	5.94527882642463
ENSMUSG00000008301	Phax	920.073676358642	protein_coding	0.665456365000014	5.89952395212364	14.4539908254452	1.7435370631177e-06	5.07178559628496e-05	5.94479988886714
ENSMUSG00000024387	Csnk2b	377.808491568128	protein_coding	0.475212931153263	6.39291458222493	14.5446939605536	1.67065333737052e-06	4.91689149212996e-05	5.94163382418945
ENSMUSG00000078500	Gm13235	1222.53	protein_coding	-0.663631075366255	6.07877032300461	-14.4640305738914	1.7352941487347e-06	5.06651840273933e-05	5.94053526703205
ENSMUSG00000057506	Bloc1s2	673.532	protein_coding	1.14233700255565	4.09473863465197	15.5992669706598	1.03501346641958e-06	3.4441992970589e-05	5.93027417378712
ENSMUSG00000028470	Hint2	418.504188181308	protein_coding	0.981554546528769	4.39358854569187	15.0744613306398	1.30829337383047e-06	4.07810244711947e-05	5.92909514300251
ENSMUSG00000031458	Coprs	597.532	protein_coding	0.670270968698405	5.3175262580613	14.447595286279	1.7488112124855e-06	5.07239653706338e-05	5.92693877809314
ENSMUSG00000041957	Pkp2	2713.73270491256	protein_coding	-0.72364933705268	5.23282288118192	-14.4554407288875	1.74234390338122e-06	5.07178559628496e-05	5.91747266191614
ENSMUSG00000030754	Copb1	3110.53	protein_coding	-0.389836251390911	6.83056062578892	-14.636455950374	1.6004261892954e-06	4.76477008744351e-05	5.90902649783343
ENSMUSG00000025785	Exosc7	840.115574137195	protein_coding	0.636314361408539	5.75139874580967	14.3694392416892	1.81475214866093e-06	5.21342250998693e-05	5.90863019614043
ENSMUSG00000029781	Fkbp9	2804.53	protein_coding	-0.468865965508895	6.31097627484295	-14.4479048490504	1.74855551049172e-06	5.07239653706338e-05	5.90721656480051
ENSMUSG00000075229	Ccdc58	612.304842446034	protein_coding	0.773649205960371	4.99753033243941	14.5082631791585	1.69950213985951e-06	4.98227705372081e-05	5.90581235094325
ENSMUSG00000037071	Scd1	4631.53	protein_coding	-0.631608202158553	5.58161935971392	-14.3570513067081	1.82546162799258e-06	5.23409317362109e-05	5.90113462261023
ENSMUSG00000028798	Eif3i	880.043710140387	protein_coding	0.395802863931894	7.85855589821034	15.2651333344442	1.20046907108066e-06	3.82939438608308e-05	5.89955677871262
ENSMUSG00000028766	Alpl	1436.69657998421	protein_coding	-0.553810172993778	6.66401631233569	-14.5326172519162	1.6801544317725e-06	4.93036723831365e-05	5.8946376089103
ENSMUSG00000086563	Platr15	563.532	lincRNA	0.65247641424821	5.49843479981819	14.3480644841162	1.83327583492575e-06	5.24149434478439e-05	5.89454367018028
ENSMUSG00000022451	Twf1	850.286094129007	protein_coding	-0.408518880340394	6.83785953257803	-14.5846094417498	1.63968298866827e-06	4.84949154788314e-05	5.88186420782261
ENSMUSG00000003299	Mrpl4	1080.53	protein_coding	0.506089350139197	6.09176317134506	14.3509332482171	1.83077726318578e-06	5.23933580775899e-05	5.88179497987005
ENSMUSG00000042323	Pbrm1	3971.92885844718	protein_coding	-0.398182360948322	6.73173062402327	-14.5345573235795	1.67862398388491e-06	4.93036723831365e-05	5.8793192189673
ENSMUSG00000000708	Kat2b	1029.89494244302	protein_coding	-0.501931765985984	6.89126361419991	-14.5974933198023	1.62982629806284e-06	4.82984718249412e-05	5.87825416678986
ENSMUSG00000047721	Bola2	226.94586701859	protein_coding	0.719012556198243	5.22708402782246	14.352021118804	1.82983078766892e-06	5.23933580775899e-05	5.87381623409431
ENSMUSG00000064966	Snord15b	53.4105	snoRNA	1.21790319714754	4.1428963520388	15.3528139837641	1.15430837727595e-06	3.71368441421468e-05	5.87085363390057
ENSMUSG00000066007	Zfp600	1747.54736119578	protein_coding	-0.993637677688033	6.68032498662036	-14.460297179617	1.73835417924864e-06	5.06651840273933e-05	5.86675441336056
ENSMUSG00000031848	Lsm4	475.794051547628	protein_coding	0.451111545163464	6.34572129981791	14.3694040117217	1.81478250372602e-06	5.21342250998693e-05	5.8615891504384
ENSMUSG00000046562	Unc119b	3168.41262407754	protein_coding	0.453435695935231	6.34840110679094	14.3637382153809	1.81967183006784e-06	5.22247553215935e-05	5.85842951665095
ENSMUSG00000036768	Kif15	4610.53	protein_coding	-0.405600391529642	6.86377462633464	-14.5419403520885	1.67281428700734e-06	4.91843410081052e-05	5.85443587212192
ENSMUSG00000036211	Hist1h1t	524.532	protein_coding	1.75540768777444	3.50680093107915	17.8660379756497	4.07287102003838e-07	1.70929750392644e-05	5.84809793102606
ENSMUSG00000019054	Fis1	542.685712190275	protein_coding	0.6471647738532	5.52741563718882	14.2418453503544	1.92857860858691e-06	5.46200363896588e-05	5.84629460515618
ENSMUSG00000014932	Yes1	2698.80745432763	protein_coding	-0.329535833318547	7.41422742010404	-14.829665112558	1.46326814497011e-06	4.41906979780974e-05	5.84566305702578
ENSMUSG00000034640	Tiparp	2456.39876971928	protein_coding	-0.520908019501472	6.12395200387807	-14.266976474495	1.90553110517031e-06	5.41203253112123e-05	5.8394780749094
ENSMUSG00000031386	Hcfc1	4682.54496005727	protein_coding	0.532194558787849	7.15379019860197	14.6465414630725	1.59291460637117e-06	4.75327616751216e-05	5.83160310229605
ENSMUSG00000026219	Trip12	1679.20277541362	protein_coding	-0.101805099809948	9.58787833180564	-17.1904533699353	5.31151060758848e-07	2.08907830166788e-05	5.82808437516921
ENSMUSG00000063870	Chd4	5284.30124275326	protein_coding	0.199670852780518	8.56773485102612	15.7887627722659	9.52796614264968e-07	3.22416502950991e-05	5.82512569151066
ENSMUSG00000030120	Mlf2	1170.97217158618	protein_coding	0.367060323850759	7.39597698141681	14.7818565737996	1.49591746812907e-06	4.49059180817287e-05	5.82372718596343
ENSMUSG00000070436	Serpinh1	2084.92927027943	protein_coding	-0.770479732986901	5.10036178826682	-14.2857900214499	1.88848245661084e-06	5.36868584093653e-05	5.82240812172646
ENSMUSG00000017677	Wsb1	1646.50854426303	protein_coding	-0.484423503953819	6.91808729671436	-14.4989369962188	1.70697822497077e-06	4.9993166356868e-05	5.82185188120459
ENSMUSG00000026192	Atic	1896.74092863184	protein_coding	-0.247561150436083	7.90100181223607	-15.1271480902436	1.27743506653538e-06	4.00685243364526e-05	5.8152709270665
ENSMUSG00000029390	Tmed2	1029.10598249366	protein_coding	-0.399625297552677	6.66470380392513	-14.3784068286841	1.80704419890154e-06	5.20113708168509e-05	5.81435774075547
ENSMUSG00000005370	Msh6	4049.53	protein_coding	-0.139870009335542	9.61909203110824	-17.2048312267718	5.28103302829353e-07	2.08527938853078e-05	5.81202971009845
ENSMUSG00000045594	Glb1	2190.53	protein_coding	-0.462559970862957	6.29999049241701	-14.252589114538	1.91868700990036e-06	5.43911565665055e-05	5.8119422714962
ENSMUSG00000101462	Gm3052	2019.53	transcribed_processed_pseudogene	-1.02880445501478	5.21690149612623	-14.2357030052021	1.934259825765e-06	5.46284764922247e-05	5.81079597728527
ENSMUSG00000018567	Gabarap	667.203268871323	protein_coding	0.684287949620961	5.95075508047113	14.1743631743455	1.9920516545477e-06	5.56141583199589e-05	5.8073102628212
ENSMUSG00000058997	Vwa8	6723.53	protein_coding	-0.564447551981928	6.1849456250516	-14.1974299172617	1.97009164889571e-06	5.5274774937131e-05	5.79937668682889
ENSMUSG00000016308	Ube2a	479.441313901573	protein_coding	0.731001095036086	5.05664595979946	14.235626659467	1.93433055967676e-06	5.46284764922247e-05	5.79827525902134
ENSMUSG00000020988	L2hgdh	3133.53	protein_coding	-0.677671561586909	5.38082380999329	-14.1498864050668	2.01565918691901e-06	5.61339600627704e-05	5.79440825734587
ENSMUSG00000018474	Chd3	4019.06199742608	protein_coding	0.691867712372773	5.44309868165979	14.1370688557686	2.02814845467645e-06	5.63251690522852e-05	5.79360145585964
ENSMUSG00000042729	Wdr74	998.532	protein_coding	0.457324980413938	6.83776356064609	14.414066392273	1.77676003066751e-06	5.1336405924546e-05	5.7931640453075
ENSMUSG00000018761	Mpdu1	630.296184796339	protein_coding	0.47205121023759	6.36066475260454	14.2259809734494	1.94329096025539e-06	5.47653402521794e-05	5.78812465461599
ENSMUSG00000020477	Mrps24	469.612996248109	protein_coding	0.502467379562948	6.16795116830587	14.1751412978714	1.99130634085397e-06	5.56141583199589e-05	5.78764330087743
ENSMUSG00000029066	Mrpl20	284.102770680697	protein_coding	0.712309735260739	5.23622640209182	14.1577437492856	2.0080463575826e-06	5.59738265296842e-05	5.78712536454178
ENSMUSG00000003421	Nosip	1929.53	protein_coding	0.636611500247151	5.59231101594571	14.1001067612274	2.06465984084143e-06	5.6970581779104e-05	5.78081479591856
ENSMUSG00000070828	Zscan4f	1261.63356550319	protein_coding	-1.43002779203437	4.50240360171838	-14.7040878748257	1.5508146807706e-06	4.63685874054484e-05	5.77963701556372
ENSMUSG00000053317	Sec61b	276.677946331588	protein_coding	0.600400793983121	5.54527340773523	14.088679736295	2.07609845520738e-06	5.71288301103723e-05	5.7746551555992
ENSMUSG00000037475	Thoc2	2095.19827164227	protein_coding	-0.41126120828955	6.97383775596351	-14.4332100009578	1.7607406746662e-06	5.09715766214302e-05	5.77303020379245
ENSMUSG00000039771	Polr2j	446.267071488688	protein_coding	0.71910246660496	5.17523693409913	14.115430566895	2.04943288048141e-06	5.67589019590652e-05	5.7608907169556
ENSMUSG00000021290	2010107E04Rik	171.166	protein_coding	0.849166982891584	4.98153811227231	14.1764178076084	1.99008434270726e-06	5.56141583199589e-05	5.75718519222442
ENSMUSG00000035614	Fam179b	6229.53	protein_coding	-0.536612043366318	5.86368938682703	-14.0541064308825	2.11114838719372e-06	5.77232919806953e-05	5.75367322378329
ENSMUSG00000020153	Ndufs7	540.185109238278	protein_coding	0.613673796650811	6.02703080336736	14.0760394824515	2.08883561192942e-06	5.73742425071913e-05	5.75286202790839
ENSMUSG00000005779	Psmb4	451.543730476896	protein_coding	0.485680956744754	7.6419484181868	14.803680509583	1.4809117281705e-06	4.46786310439712e-05	5.75226812190582
ENSMUSG00000023104	Rfc2	653.916583906636	protein_coding	0.430674419945096	6.66194212578237	14.2529147903452	1.91838806860365e-06	5.43911565665055e-05	5.74882650126313
ENSMUSG00000001441	Npepps	1225.54074449729	protein_coding	-0.541163534913681	5.8721345070531	-14.0400047337814	2.12563743682183e-06	5.80666175809629e-05	5.74636449311929
ENSMUSG00000017478	Zc3h18	2041.95825871026	protein_coding	0.365161477012919	6.85577168599005	14.317109231107	1.86048484997488e-06	5.2986443842531e-05	5.73837858124933
ENSMUSG00000028333	Anp32b	1511.53	protein_coding	0.343734133106004	7.44832646141332	14.6248714112316	1.60910402807964e-06	4.78258822351782e-05	5.72611407040681
ENSMUSG00000022443	Myh9	5437.11030743414	protein_coding	-0.430351239517061	7.35832515536205	-14.5536674556543	1.66363322216292e-06	4.90597273295012e-05	5.72601558193
ENSMUSG00000000303	Cdh1	3797.68645501206	protein_coding	-0.469951690050268	7.45351430686469	-14.607542432916	1.62218511828441e-06	4.8119487284628e-05	5.72411420681766
ENSMUSG00000038084	Opa1	3188.45033679293	protein_coding	-0.39630884006435	6.92861009270493	-14.3153088611999	1.86208142359855e-06	5.2986443842531e-05	5.72366454303589
ENSMUSG00000039953	Clstn1	3441.54134120689	protein_coding	-0.473290226692682	7.16950901531418	-14.4263673889032	1.76644761580371e-06	5.10875692081672e-05	5.71841775651989
ENSMUSG00000040084	Bub1b	2568.91863066198	protein_coding	-0.280131581972794	7.86521817445054	-14.8994650730982	1.41704650205884e-06	4.30980064173746e-05	5.71548878506059
ENSMUSG00000080893	Gm15920	202.779	processed_pseudogene	0.760284437360046	5.52305059701446	13.9613824009445	2.2085233058662e-06	6.00035414267392e-05	5.71310029243794
ENSMUSG00000022253	Nadk2	2181.67799158637	protein_coding	-0.612678204851737	5.96076422245925	-13.9620642872659	2.20778881016346e-06	6.00035414267392e-05	5.70297272552887
ENSMUSG00000087166	L1td1	1579.20360139516	protein_coding	-0.178057019723505	8.48750613263227	-15.4419540303903	1.10943941519847e-06	3.59628317015091e-05	5.70048408866463
ENSMUSG00000006356	Crip2	874.943963864789	protein_coding	1.13438388534506	4.0615647771879	14.9540806610056	1.38203729702996e-06	4.22470383911021e-05	5.69824462876309
ENSMUSG00000090553	Snrpe	291.342552673686	protein_coding	0.581819220653442	5.95563349899536	13.9534973227141	2.21703696580498e-06	6.0180437023915e-05	5.69744776651181
ENSMUSG00000036114	Rpp25l	651.532	protein_coding	1.12296262438034	4.32065856431739	14.5574922923295	1.66065119782763e-06	4.90597273295012e-05	5.69391152625925
ENSMUSG00000037710	Cisd1	879.532	protein_coding	0.711007448804809	5.2956707626945	13.944336113636	2.22697541885378e-06	6.03609901621661e-05	5.693891861816
ENSMUSG00000015143	Actn1	2946.82723818307	protein_coding	-0.434001141325713	6.72769549974343	-14.1258144725481	2.03918723196957e-06	5.65794433365223e-05	5.67325858498801
ENSMUSG00000018921	Pelp1	3078.78934856335	protein_coding	0.511315100986665	6.22014711905849	13.9424945020183	2.22897938767104e-06	6.03609901621661e-05	5.66460524879549
ENSMUSG00000089855	Gm15662	58.0708	unprocessed_pseudogene	0.514573182108752	5.98260457189953	13.8895981171083	2.28742440682254e-06	6.16455748884399e-05	5.66298897955562
ENSMUSG00000057278	Snrpg	191.924544299763	protein_coding	0.873379121916935	5.54099282483232	13.8555728985208	2.32593986950723e-06	6.21263707900648e-05	5.66233023364726
ENSMUSG00000020775	Mrpl38	1072.85752570843	protein_coding	0.544641676154091	5.977420724836	13.8821252432553	2.2958208846361e-06	6.17058334189894e-05	5.65983029958473
ENSMUSG00000002379	Ndufa11	2456.53	protein_coding	0.72671278890224	6.13889043407083	13.8939445697742	2.2825568300248e-06	6.15696141700316e-05	5.65166373085166
ENSMUSG00000044285	Gm1821	485.532	processed_pseudogene	0.320427679509542	9.0658685537034	16.0243453379422	8.60756205727984e-07	3.00851933518744e-05	5.65154599447383
ENSMUSG00000037470	Uggt1	3596.08217859011	protein_coding	-0.373175549497272	7.22423123769885	-14.3209746032034	1.8570622858952e-06	5.29518516867171e-05	5.6454780663668
ENSMUSG00000025204	Ndufb8	275.184326508707	protein_coding	0.499303634572953	6.72405137983988	14.0717038408521	2.09322495338111e-06	5.73898874307929e-05	5.64350986038604
ENSMUSG00000061684	Rpl21-ps8	274.363	processed_pseudogene	0.471516008783646	6.47077191979873	13.9735994841761	2.19540566302603e-06	5.97552035944467e-05	5.64219251294582
ENSMUSG00000022400	Rbx1	1450.53	protein_coding	0.471547573091499	6.14727696517098	13.8713900638362	2.30794431177745e-06	6.19762454196611e-05	5.63702417256672
ENSMUSG00000068240	Gm11808	299.921	protein_coding	0.414234609800861	7.83102199365333	14.7225307690543	1.53759125013349e-06	4.60190034614157e-05	5.63646684881184
ENSMUSG00000016344	Ppdpf	456.044227729561	protein_coding	0.60827232806442	6.07262421992524	13.8457920182227	2.33714766828446e-06	6.2370293325293e-05	5.63319938238175
ENSMUSG00000054693	Adam10	3518.41209156057	protein_coding	-0.898067880653477	4.59346208005571	-14.1214027394386	2.04353308732375e-06	5.66477174732393e-05	5.62813142487123
ENSMUSG00000095180	Rhox5	459.595369205561	protein_coding	0.979239225118952	5.18162744806118	13.8293197465465	2.35616221484385e-06	6.27662397108535e-05	5.62658111501593
ENSMUSG00000021807	2700060E02Rik	1305.53	protein_coding	0.32029254102887	7.27742157088569	14.3211244005606	1.85692979326055e-06	5.29518516867171e-05	5.62427591783297
ENSMUSG00000039187	Fanci	2699.5244265813	protein_coding	-0.477944112479298	6.14419802982136	-13.8342439848512	2.35045960572138e-06	6.26698852638169e-05	5.62043214583035
ENSMUSG00000024006	Stk38	1425.08213971545	protein_coding	-0.389687895079227	7.15368484161194	-14.2159363164922	1.95267222597324e-06	5.49399323204776e-05	5.61179534089608
ENSMUSG00000074656	Eif2s2	2078.87332278091	protein_coding	0.207253070303677	9.39095200077345	16.410867988952	7.30825626042616e-07	2.68795339497608e-05	5.61123475080014
ENSMUSG00000038690	Atp5j2	350.729581639084	protein_coding	0.612309076870964	6.94404564681203	14.1034527503148	2.06132404359005e-06	5.69308145090418e-05	5.6100628533835
ENSMUSG00000056216	Cebpg	2216.95084066012	protein_coding	-0.595463473272839	5.5927086516925	-13.7443125792748	2.45713066933554e-06	6.48807728320418e-05	5.60865632439029
ENSMUSG00000037643	Prkci	2147.79350758268	protein_coding	-0.478774920748862	6.80598189669238	-14.0269210541158	2.13918176711599e-06	5.83835358038767e-05	5.60537799542283
ENSMUSG00000041891	Lman1	2746.95747318068	protein_coding	-0.459598276017647	6.9133093983602	-14.0730824515923	2.09182813064379e-06	5.73898874307929e-05	5.6033684242647
ENSMUSG00000020964	Sel1l	3091.28094493355	protein_coding	-0.705827299186693	5.87016362410315	-13.7491277116568	2.4512816352587e-06	6.47832558116876e-05	5.60323557791762
ENSMUSG00000040731	Eif4h	2113.19642381893	protein_coding	0.209852392841528	8.58582077446477	15.3568534268834	1.15223096142354e-06	3.71097407929433e-05	5.60190735555847
ENSMUSG00000070394	Tmem256	269.992325263982	protein_coding	0.819021005126008	4.97009911655561	13.8145403806436	2.37337248783079e-06	6.31128052095818e-05	5.59381657797045
ENSMUSG00000060733	Ipmk	3273.25363888472	protein_coding	-0.411567389359633	7.01802552826876	-14.107701652439	2.05709691801218e-06	5.69186973198415e-05	5.59347742896927
ENSMUSG00000025272	Tro	3580.34160065285	protein_coding	-0.591316301951376	5.56487365054102	-13.6977999824884	2.51445533958005e-06	6.61288705517178e-05	5.58579175871885
ENSMUSG00000028975	Pex14	1594.94617254882	protein_coding	0.582654039561429	5.58522475708447	13.6970424457226	2.51540147893818e-06	6.61288705517178e-05	5.58535216739501
ENSMUSG00000041712	Ubr7	3042.53	protein_coding	-0.412325057801662	7.42304749687739	-14.3206590760059	1.85734139830942e-06	5.29518516867171e-05	5.58372070698591
ENSMUSG00000087412	Gm15501	420.96338987618	transcribed_processed_pseudogene	0.735622527373328	8.94157507152668	15.6715490570546	1.00273450203025e-06	3.35079289129535e-05	5.58257033030914
ENSMUSG00000010406	Mrpl52	186.969699399515	protein_coding	0.787198794436613	5.1040930062243	13.7424920171163	2.45934627638122e-06	6.48822618603856e-05	5.58003054535441
ENSMUSG00000006369	Fbln1	2299.85327249904	protein_coding	-0.71312238916208	5.1505196569096	-13.7210281925117	2.48563963165572e-06	6.55184081505463e-05	5.57328987653974
ENSMUSG00000028851	Nudc	545.500778807537	protein_coding	0.276947797095772	8.17531346889471	14.8939149432761	1.42066035862764e-06	4.3164229642469e-05	5.57309204610551
ENSMUSG00000063787	Chchd1	382.554	protein_coding	0.670534655244929	5.22626603138283	13.6780530901157	2.53925141773303e-06	6.66392714859912e-05	5.56299094070608
ENSMUSG00000039735	Fnbp1l	2500.71912066297	protein_coding	-0.579327813417802	6.29788931675128	-13.7576934770019	2.44091574255929e-06	6.46229754609374e-05	5.56250424506334
ENSMUSG00000024989	Cep55	1795.93162238976	protein_coding	-0.467129392311404	6.66961600833803	-13.8831762420875	2.29463787208292e-06	6.17058334189894e-05	5.56005875630434
ENSMUSG00000047843	Bri3	750.532	protein_coding	0.838196104239198	4.70627190625856	13.8595866842946	2.32135822331208e-06	6.21083940035501e-05	5.55979357442607
ENSMUSG00000033751	Gadd45gip1	2289.53	protein_coding	0.699960313806533	5.33572760713089	13.6563447922364	2.56683197441127e-06	6.71070965728523e-05	5.55963766357859
ENSMUSG00000033392	Clasp2	4979.07212695796	protein_coding	-0.472037932879806	6.44255502069434	-13.7941711226916	2.39732697249764e-06	6.35810045865681e-05	5.55695490351558
ENSMUSG00000071415	Rpl23	512.663037328217	protein_coding	0.340139916436925	8.35727257317618	15.0280033287342	1.33620908011874e-06	4.13509234278971e-05	5.55589032043912
ENSMUSG00000028955	Vamp3	907.357179768596	protein_coding	-0.524529079356665	6.50380932459213	-13.7978376642936	2.39299485160889e-06	6.35221751731409e-05	5.54902344917385
ENSMUSG00000050627	Gpd1l	2645.5573902424	protein_coding	-0.650502938640227	5.25463591706926	-13.6129158303672	2.62303789876393e-06	6.82545592604632e-05	5.53244833344811
ENSMUSG00000044627	Swi5	379.744396498788	protein_coding	0.426943826509755	6.84450380350681	13.9092823914362	2.26547398280334e-06	6.11637266031066e-05	5.52995812848425
ENSMUSG00000021250	Fos	1487.3449851241	protein_coding	0.626125031055108	5.5672847947489	13.5814814372599	2.66459420642408e-06	6.90840304649156e-05	5.52826841219541
ENSMUSG00000024790	Sac3d1	1169.53	protein_coding	1.02018422760768	4.24814916325734	14.1730683639893	1.9932925724848e-06	5.56141583199589e-05	5.5230369161336
ENSMUSG00000034560	A230046K03Rik	5649.53	protein_coding	-0.429214214288527	7.25980346045664	-14.1035454969483	2.06123166684885e-06	5.69308145090418e-05	5.52242772791819
ENSMUSG00000015804	Med28	573.188590110013	protein_coding	0.682894411187338	5.25342041676357	13.5835676920622	2.66181308754592e-06	6.90840304649156e-05	5.519725423814
ENSMUSG00000000594	Gm2a	3922.53	protein_coding	-0.8026835850895	4.75691842463309	-13.7505908689482	2.44950744888755e-06	6.47832558116876e-05	5.51819238360404
ENSMUSG00000028609	Magoh	487.532	protein_coding	0.585100244322277	5.81757883520036	13.5671663774363	2.68376654595874e-06	6.94014638033685e-05	5.51235681232272
ENSMUSG00000047675	Rps8	236.989816396435	protein_coding	0.67502750514346	9.12286858268572	15.7623844546742	9.63783081309083e-07	3.25767354446081e-05	5.51022633785551
ENSMUSG00000057110	Cntrl	4122.28126744024	protein_coding	-0.541666585518919	5.87260115694978	-13.5613447273447	2.69160840200635e-06	6.9544403157256e-05	5.50678846789431
ENSMUSG00000028044	Cks1b	315.703890452998	protein_coding	0.552647498400183	6.29943900682498	13.6552406289579	2.56824390358348e-06	6.71070965728523e-05	5.50590898719628
ENSMUSG00000022139	Mbnl2	4347.53	protein_coding	-0.948715050815766	4.8926541735368	-13.659322759799	2.5630283514847e-06	6.70874903604214e-05	5.50102709580478
ENSMUSG00000066487	Gm5786	677.532	protein_coding	0.715443596040152	5.25128478478141	13.5419606969743	2.71790749433862e-06	6.99832067672504e-05	5.49930430586934
ENSMUSG00000023307	March5	1317.02560868769	protein_coding	-0.410131646700743	6.53864527906155	-13.7159157967073	2.49194941982115e-06	6.56271587346238e-05	5.49759869080292
ENSMUSG00000009741	Ubp1	3034.08248972072	protein_coding	-0.493358879154623	6.34896476792262	-13.6490963903875	2.57611689470824e-06	6.72543323797462e-05	5.49707399228887
ENSMUSG00000044461	Shisa2	2939.53	protein_coding	-1.01089356836227	4.31570224565571	-14.0576569020119	2.10751812002283e-06	5.76765136507888e-05	5.49188845661305
ENSMUSG00000032883	Acsl3	1452.27809295261	protein_coding	-0.618964664755111	5.69244693403737	-13.5104004350676	2.76135440726593e-06	7.08590423432399e-05	5.49060303150126
ENSMUSG00000026743	Mllt10	2276.74602560455	protein_coding	-0.687381365107651	5.2861773585849	-13.5135800433341	2.75694165403598e-06	7.08062733009633e-05	5.48638021722446
ENSMUSG00000060180	Myh13	3623.28886734451	protein_coding	-1.51433897170456	3.65492703675963	-15.5651823260043	1.05064400659734e-06	3.47313550651744e-05	5.4771787171219
ENSMUSG00000064344	mt-Tm	28.993	Mt_tRNA	1.95338140484719	3.4416254819204	16.7105303973637	6.45370050213216e-07	2.43321513661944e-05	5.47533932673413
ENSMUSG00000031502	Col4a1	6410.53	protein_coding	-1.99111295042607	3.32024943866312	-17.9643920131638	3.9215956621221e-07	1.66205963400715e-05	5.47037698728696
ENSMUSG00000044017	Adgrd1	4953.35074394273	protein_coding	-2.32129847713001	3.56115269890064	-17.0381610684596	5.64694185879981e-07	2.1846618434353e-05	5.46450959353534
ENSMUSG00000063511	Snrnp70	991.555724961861	protein_coding	0.270576276498999	7.62688507596713	14.2245284783755	1.94464434919882e-06	5.47653402521794e-05	5.45299290125205
ENSMUSG00000045193	Cirbp	626.222544371968	protein_coding	0.84304032930994	4.85616181776144	13.5489344044046	2.708412467052e-06	6.9815617199634e-05	5.45252963330977
ENSMUSG00000073678	Pgap1	6883.95218239383	protein_coding	-0.642308758767221	5.33483699256201	-13.4337571779137	2.87019218246491e-06	7.29665015997361e-05	5.45041471509573
ENSMUSG00000025351	Cd63	695.283978912222	protein_coding	0.562977916952947	6.00645484375908	13.4623096636888	2.82908554859437e-06	7.21861035622367e-05	5.44269567712016
ENSMUSG00000031533	Mrps31	1331.53	protein_coding	0.571628990615673	5.53732359424421	13.4087044035965	2.90682057329433e-06	7.3586395456547e-05	5.44202266547937
ENSMUSG00000063972	Nr6a1	3212.16257980335	protein_coding	0.512043999031446	6.69575310696414	13.669439014636	2.55015512142667e-06	6.68670255181064e-05	5.43859796854221
ENSMUSG00000038712	Fam63a	968.329476702071	protein_coding	-0.654560769747459	5.53347469904164	-13.4005024370869	2.9189275569667e-06	7.37685905460828e-05	5.43807927970858
ENSMUSG00000040354	Mars	1939.54121728425	protein_coding	-0.249620992045148	8.54582084436918	-14.9711403496635	1.37130442484703e-06	4.20044104609873e-05	5.4346550507276
ENSMUSG00000105874	AL606464.1	48.2561	miRNA	1.53223535867877	3.45101423471328	15.965097162448	8.82912723928618e-07	3.05709493650381e-05	5.43367285316268
ENSMUSG00000041560	Gltscr2	871.929909308394	protein_coding	0.247210276799303	8.01954821544766	14.4865731233465	1.71694716386973e-06	5.02361687703227e-05	5.43138732214503
ENSMUSG00000053907	Mat2a	1157.55209155144	protein_coding	-0.343386543698076	7.65753912247185	-14.193377908505	1.97392921832875e-06	5.53307827253364e-05	5.43129557230123
ENSMUSG00000050856	Atp5k	176.618801831902	protein_coding	0.979744083882633	4.69745435130119	13.5823376470852	2.66345242105735e-06	6.90840304649156e-05	5.43063334000352
ENSMUSG00000037300	Ttc13	2502.744851805	protein_coding	-0.553093420156502	5.63532094153467	-13.386524206129	2.93969333151037e-06	7.40774919621153e-05	5.42934152584263
ENSMUSG00000097037	Gm26818	1155.53	lincRNA	-1.62008100355831	4.44291686139567	-13.9209813749302	2.25254173504436e-06	6.08900992703388e-05	5.42895746548541
ENSMUSG00000083022	Rps15a-ps6	194.831	processed_pseudogene	0.521237798350594	6.35497717973555	13.5191305811244	2.74925766429221e-06	7.06693272492015e-05	5.42510886918593
ENSMUSG00000041235	Chd7	7449.32171181048	protein_coding	0.877564568213431	4.94587283427824	13.4536845899954	2.84143194094295e-06	7.24191589426587e-05	5.42254298224618
ENSMUSG00000029701	Rbm28	2126.78509854087	protein_coding	-0.394834530672846	6.63575512508217	-13.6096245403	2.62735425385038e-06	6.82953010155277e-05	5.42136456505799
ENSMUSG00000031530	Dusp4	2535.53	protein_coding	0.63897348091486	5.23835900732256	13.3806719711881	2.94843715300544e-06	7.42023350173036e-05	5.42047707785911
ENSMUSG00000018417	Myo1b	1590.28162681704	protein_coding	-0.619865378026529	6.12502481269659	-13.4176740334831	2.89364577276317e-06	7.33362457507649e-05	5.40888970894983
ENSMUSG00000001289	Pfdn5	239.070969498116	protein_coding	0.717159561163234	5.55143408191988	13.337165187893	3.01437594967991e-06	7.51692804248396e-05	5.40586772039234
ENSMUSG00000058013	Sept11	2981.22997300732	protein_coding	0.187611786607386	8.62980699613577	15.0179929283941	1.34231256174489e-06	4.14970680739425e-05	5.40581815216362
ENSMUSG00000021929	Kpna3	3962.53	protein_coding	-0.373167604110686	6.72737168387709	-13.6125513820924	2.62351545628257e-06	6.82545592604632e-05	5.40233379572029
ENSMUSG00000044876	Zfp444	1056.72384916462	protein_coding	0.930338593392427	4.44801837190687	13.6671881345346	2.55301305781036e-06	6.68836001518252e-05	5.40010830076562
ENSMUSG00000017724	Etv4	955.359895880665	protein_coding	0.769815890999552	4.74251893497632	13.4694717645118	2.8188796927571e-06	7.20889496916239e-05	5.39601638433651
ENSMUSG00000062518	Zfp534	2680.53	protein_coding	-0.497836280566489	6.68757509749091	-13.5729948686693	2.67594149843075e-06	6.92587132526664e-05	5.392556508972
ENSMUSG00000050552	Lamtor4	682.142530821337	protein_coding	1.10345883025557	4.45673275789175	13.6401627449206	2.58761315432626e-06	6.74372833255419e-05	5.38235003416658
ENSMUSG00000048154	Kmt2d	12190.1034610531	protein_coding	0.749428075430385	5.01264968709557	13.3383744320671	3.01252071122776e-06	7.51692804248396e-05	5.37885412902093
ENSMUSG00000037805	Rpl10a	776.186594271448	protein_coding	0.276032798145394	7.71229933280493	14.1388099024682	2.0264468424365e-06	5.63251690522852e-05	5.3747647775695
ENSMUSG00000038766	Gabpb2	6812.00558181611	protein_coding	-0.38044782712575	7.01820325001345	-13.6949756592014	2.51798489012836e-06	6.61389230449888e-05	5.37350001859755
ENSMUSG00000032796	Lama1	9313.53	protein_coding	-0.473506089072385	6.62437582438155	-13.4959605230453	2.78149589534068e-06	7.12541945090299e-05	5.36438705030118
ENSMUSG00000032116	Stt3a	1548.95880884951	protein_coding	-0.327170173777674	7.27851387689264	-13.8194473643023	2.36764259468878e-06	6.30162022389755e-05	5.36199154533006
ENSMUSG00000031297	Slc7a3	1176.12514572055	protein_coding	-0.29216070159268	7.71356853263623	-14.0942296405816	2.07053394060221e-06	5.70279325216828e-05	5.35540996456119
ENSMUSG00000069601	Ank3	2452.51396091692	protein_coding	-0.693569004688642	5.17553063086855	-13.2472919718539	3.15596896167443e-06	7.81811305270857e-05	5.34875873818619
ENSMUSG00000058833	2810428I15Rik	464.672511988044	protein_coding	0.81630677689132	4.76235588577382	13.3556118108455	2.98621559229907e-06	7.46529054351038e-05	5.34679275987918
ENSMUSG00000022800	Fyttd1	947.265387343536	protein_coding	-0.528672643174696	6.47814306852559	-13.3900002014132	2.93451381108649e-06	7.40774919621153e-05	5.33773725906582
ENSMUSG00000040681	Hmgn1	439.140454044312	protein_coding	0.251772978513586	8.18044349311292	14.4430395531086	1.75257922012547e-06	5.07842362445037e-05	5.33553503033365
ENSMUSG00000015869	Prpsap1	1446.42073177102	protein_coding	0.645670959879743	5.91292018168626	13.2358751051297	3.17449160480464e-06	7.85105335249173e-05	5.33394441581868
ENSMUSG00000026473	Glul	944.834168539273	protein_coding	0.244628045236137	8.13641444426407	14.3972707248276	1.79095133541965e-06	5.16471177332296e-05	5.33166700443241
ENSMUSG00000022403	St13	1200.79202083882	protein_coding	-0.272973779158505	8.52196585463892	-14.7375388274478	1.52692523641676e-06	4.57453404078635e-05	5.32752568573641
ENSMUSG00000025135	Anapc11	719.747207698448	protein_coding	0.771135445185926	5.16955734578982	13.1928700922491	3.24538116833223e-06	7.97462122550279e-05	5.32273953128693
ENSMUSG00000022205	Sub1	398.829116890065	protein_coding	0.300907855207045	7.85163418616456	14.1453933026285	2.0200272240163e-06	5.62035167170981e-05	5.32265513089984
ENSMUSG00000029198	Grpel1	3323.53	protein_coding	0.551749904245028	6.57655584453003	13.4026506678395	2.91575100308981e-06	7.37503382927993e-05	5.32168273686706
ENSMUSG00000040225	Prrc2c	4203.29058149442	protein_coding	0.264767108929044	7.75226232064042	14.0668428123114	2.09815867346622e-06	5.74727164803888e-05	5.32026200123044
ENSMUSG00000018340	Anxa6	2275.05191322037	protein_coding	-0.52375717281186	6.48499077227437	-13.3588229761465	2.98134410965579e-06	7.46529054351038e-05	5.31951277651662
ENSMUSG00000038274	Fau	377.440044447708	protein_coding	0.595147890787141	5.36992274518293	13.1628698301878	3.2958998707218e-06	8.04536922951416e-05	5.31717914700875
ENSMUSG00000022433	Csnk1e	1164.40342727728	protein_coding	-0.4152677790197	6.38851386076877	-13.3246324088069	3.03368062390937e-06	7.55879511342062e-05	5.31687966126638
ENSMUSG00000024844	Banf1	531.423810528221	protein_coding	0.406017876060496	7.13081975203379	13.6448996724386	2.58151018842432e-06	6.73366316423284e-05	5.31039479029998
ENSMUSG00000047613	A430005L14Rik	607.096439444369	protein_coding	0.712465574594304	5.18180752760203	13.1651527326921	3.29202431368745e-06	8.04244216276377e-05	5.31025679104157
ENSMUSG00000040824	Snrpd2	1214.66210584794	protein_coding	0.423755051758643	6.96717152212815	13.5489259522997	2.70842395212575e-06	6.9815617199634e-05	5.30517457055434
ENSMUSG00000065649	Snora74a	71.4776	snoRNA	1.17648178069398	4.01534741196724	13.9202818807038	2.25331260237002e-06	6.08900992703388e-05	5.29903804445892
ENSMUSG00000058006	Mdn1	13853.1113022589	protein_coding	-0.135881183043244	9.0251828372157	-15.2558405835299	1.20548337089832e-06	3.84131175102053e-05	5.2974652802913
ENSMUSG00000042035	Igsf3	6237.86475645822	protein_coding	-0.682295946173883	5.47634385874098	-13.1225392449215	3.36522968348937e-06	8.18799892786818e-05	5.29723241051236
ENSMUSG00000024201	Kdm4b	2604.46459401201	protein_coding	-0.811958835454788	4.73606278535446	-13.2655587859888	3.12658808239078e-06	7.76453266840997e-05	5.29410834152006
ENSMUSG00000004667	Polr2e	897.708517443143	protein_coding	0.414050038279448	6.74915764027506	13.417092031284	2.89449856768635e-06	7.33362457507649e-05	5.28907143634172
ENSMUSG00000021109	Hif1a	2782.38821205127	protein_coding	-0.340632618162962	7.0016932425538	-13.5319812802186	2.73156086857475e-06	7.02745484073654e-05	5.28878220790293
ENSMUSG00000066009	Gm13051	664.227056523802	protein_coding	-1.11435912398125	4.57977770133055	-13.3565338218099	2.984815934154e-06	7.46529054351038e-05	5.28473807958499
ENSMUSG00000019210	Atp6v1e1	780.344176644689	protein_coding	0.426244829450143	6.88223115127749	13.4663696599209	2.82329498232305e-06	7.21404684726405e-05	5.28281176601146
ENSMUSG00000037266	Rsrp1	1048.48855029113	protein_coding	-0.473405848370597	6.35347485086418	-13.2478121411513	3.15512797490956e-06	7.81811305270857e-05	5.28239331930466
ENSMUSG00000021811	Dnajc9	1426.53	protein_coding	0.682087670311615	5.36954354632469	13.0938700788256	3.41552184163903e-06	8.26352784375291e-05	5.28200265608682
ENSMUSG00000030538	Cib1	405.27509921213	protein_coding	0.955855615703062	4.69970292683888	13.2496833252088	3.15210483382015e-06	7.81811305270857e-05	5.28143947534228
ENSMUSG00000014771	Pdcd2	742.506226873652	protein_coding	0.513250861378881	5.78188406665143	13.1095930010198	3.38783528525634e-06	8.22967360441938e-05	5.27741288119529
ENSMUSG00000023967	Mrps18a	677.769897753228	protein_coding	0.706964152825682	5.2933588707972	13.0867113074988	3.42821292951798e-06	8.27424661197477e-05	5.27646252836251
ENSMUSG00000069769	Msi2	2462.40097163604	protein_coding	-0.351031907843466	6.93779577497541	-13.4769843059103	2.80821944112754e-06	7.18775008402397e-05	5.27638074652473
ENSMUSG00000071708	Sms	1105.30606991789	protein_coding	0.523934372958196	6.18873535647579	13.190264120717	3.2497343742652e-06	7.9780447885862e-05	5.27551576988698
ENSMUSG00000064194	Zfp936	1947.72993094124	protein_coding	-0.490145494328069	6.08423957005941	-13.1536247082807	3.31164794387051e-06	8.07724911244846e-05	5.27210519123084
ENSMUSG00000031924	Cyb5b	4089.53	protein_coding	-0.634653753466716	6.20865772542878	-13.1773328083739	3.27143425758663e-06	8.01821598745681e-05	5.27010932418617
ENSMUSG00000007880	Arid1a	6938.76554298631	protein_coding	0.508712916129805	6.02404589274759	13.1349909699251	3.34364926285313e-06	8.14208401130257e-05	5.26757955162858
ENSMUSG00000071497	Nutf2-ps1	659.532	protein_coding	0.358597811537822	6.76333197243723	13.3752479524734	2.95656759796971e-06	7.42825248757457e-05	5.26214844012187
ENSMUSG00000099370	Platr10	759.981221427692	lincRNA	-0.531503933811842	5.87231910271715	-13.0898930252667	3.42256576366877e-06	8.26725712479766e-05	5.26126405504146
ENSMUSG00000004099	Dnmt1	5140.87393498084	protein_coding	-0.191821703358801	8.57354878050186	-14.6402243036679	1.5976148519713e-06	4.76257229036565e-05	5.2456072106495
ENSMUSG00000028207	Asph	3229.69821638061	protein_coding	-0.588320405882959	5.58360914579575	-13.018860796969	3.55119851798048e-06	8.46904478307901e-05	5.24163102253823
ENSMUSG00000032113	Chek1	1032.7699817431	protein_coding	-0.521971758507959	6.10926702072055	-13.1007640575521	3.40335065391933e-06	8.2473615967437e-05	5.24083991248098
ENSMUSG00000030717	Nupr1	303.975143119519	protein_coding	0.590261330594104	6.02437151464111	13.0747007921927	3.44962584472191e-06	8.31257474001995e-05	5.23583074473374
ENSMUSG00000066760	Psg16	4216.53	protein_coding	-0.702695139707114	5.07429993709621	-13.0317736971164	3.5274111112226e-06	8.44258995287433e-05	5.23394891128217
ENSMUSG00000032959	Pebp1	1033.27461502331	protein_coding	0.285962130112174	8.00487572889484	14.0943032759567	2.07046022553948e-06	5.70279325216828e-05	5.22958571613014
ENSMUSG00000023951	Vegfa	1722.23427859389	protein_coding	-0.552249439340136	5.79569983464997	-13.006450788175	3.57423155370598e-06	8.4970003130784e-05	5.22338709996075
ENSMUSG00000089726	Mir17hg	3331.53	lincRNA	-0.655054767436255	5.29254256038246	-12.9726065143549	3.63791491951044e-06	8.57509779303568e-05	5.217868583203
ENSMUSG00000040268	Plekha1	1540.11315792829	protein_coding	-0.513267810576008	5.90941842828878	-13.0048910281176	3.57713847457624e-06	8.49718846027996e-05	5.21224187297638
ENSMUSG00000021939	Ctsb	4534.53	protein_coding	-0.383242326354486	6.65320343397904	-13.2270648753026	3.18886979320642e-06	7.8610474956004e-05	5.21003049771193
ENSMUSG00000009013	Dynll1	448.968495611608	protein_coding	0.293336712346679	7.75046010617768	13.8593627494784	2.32161356925914e-06	6.21083940035501e-05	5.20898575201474
ENSMUSG00000028127	Abcd3	2325.65181781797	protein_coding	-0.787077305833266	5.47471524141289	-12.9505024503706	3.68020358142228e-06	8.6463203610757e-05	5.20861056401797
ENSMUSG00000041936	Agrn	4500.70045390758	protein_coding	-0.438962060518348	7.09579432111175	-13.4298196827656	2.87591406811266e-06	7.30501621578338e-05	5.20825257911773
ENSMUSG00000073664	Nbeal1	5655.78166847948	protein_coding	-0.58771861565534	6.13874598659826	-13.021715538916	3.54592401054565e-06	8.46318273176222e-05	5.19493683182698
ENSMUSG00000041303	Gtf3c3	3223.09833862729	protein_coding	-0.430906387961897	6.34254008137471	-13.0793929007738	3.44124248039937e-06	8.29902851472878e-05	5.19196879717789
ENSMUSG00000030279	C2cd5	2786.86142611563	protein_coding	-0.39801836007847	6.61250533254808	-13.1734300569133	3.27801575557922e-06	8.02126184359934e-05	5.18983208797704
ENSMUSG00000036305	Rpl39-ps	163.153	transcribed_processed_pseudogene	0.326785239001238	8.20968924876778	14.1881111969121	1.97892992630922e-06	5.54192594181413e-05	5.18712704243323
ENSMUSG00000064337	mt-Rnr1	750.532	Mt_rRNA	0.564262434517508	6.73459887907441	13.2200442538333	3.20038039806125e-06	7.88264185092972e-05	5.18654897508966
ENSMUSG00000089417	Gm22009	153.871	scaRNA	0.80820811994504	4.73105360909128	13.0252556678994	3.53939552988522e-06	8.4543160792942e-05	5.18635845661362
ENSMUSG00000084911	Gm16185	3002.53	antisense	-0.856684746331161	5.47655873634644	-12.9052354586159	3.76856294714537e-06	8.81943520239652e-05	5.18511259379828
ENSMUSG00000061544	Zfp229	1466.30027089637	protein_coding	-0.773769178342228	5.7881202410841	-12.9222357326032	3.73509924500349e-06	8.76159228829898e-05	5.18110379713524
ENSMUSG00000061306	Slc38a10	2371.32546660832	protein_coding	-0.483128165384991	6.09291911709872	-12.9872729503019	3.61016060361637e-06	8.5418673998479e-05	5.1810745752783
ENSMUSG00000064264	Zfp428	765.663184309266	protein_coding	0.974175683460201	4.82628064561392	12.9854715742488	3.61355646921882e-06	8.54317532207366e-05	5.17972943682851
ENSMUSG00000061559	Wdr61	882.477556605121	protein_coding	0.369731432568689	6.81126329405186	13.2299562837009	3.18414290089346e-06	7.8610474956004e-05	5.17036716055946
ENSMUSG00000032494	Tdgf1	919.645647576425	protein_coding	-0.320086057639712	8.71860063262454	-14.6349872232795	1.6015234411521e-06	4.76477008744351e-05	5.1693445395138
ENSMUSG00000034932	Mrpl54	398.748152486333	protein_coding	0.921466835384245	4.66564099096217	13.0113601435449	3.56509951823934e-06	8.48872229980777e-05	5.16403142337204
ENSMUSG00000000730	Dnmt3l	1454.8916023301	protein_coding	0.364897204507791	7.35699247236759	13.5070333281395	2.76603613742695e-06	7.09186176566063e-05	5.16190037079861
ENSMUSG00000025791	Pgm2	2168.25935789809	protein_coding	-0.756217597912656	4.98362324190291	-12.8993261054721	3.78027478497918e-06	8.83580579260683e-05	5.15849894179492
ENSMUSG00000024507	Hsd17b4	1710.50011791893	protein_coding	-0.586041055628476	6.21086055584693	-12.9714173148322	3.64017593730659e-06	8.57509779303568e-05	5.15701921135983
ENSMUSG00000039640	Mrpl12	819.513362421854	protein_coding	0.542600313004663	5.72476571077052	12.8750792481856	3.82876523555172e-06	8.88578105390763e-05	5.15701691197722
ENSMUSG00000021018	Polr2h	745.299920896211	protein_coding	0.508783984654327	5.7711407803306	12.8596943757527	3.85989954809607e-06	8.94264622364988e-05	5.14503839210543
ENSMUSG00000079523	Tmsb10	363.570062650308	protein_coding	0.462206018138398	6.63374340454861	13.1052554964074	3.39544763894405e-06	8.24150291620595e-05	5.14498291548733
ENSMUSG00000002980	Bcam	1893.77127089166	protein_coding	-0.61279036527278	5.35884349003048	-12.825404508214	3.93033313574748e-06	9.08282793160018e-05	5.14348465429361
ENSMUSG00000004096	Cwc15	906.532	protein_coding	0.458588866095184	6.35378421660791	12.9969116387884	3.59205176098844e-06	8.52377944129106e-05	5.14220837382087
ENSMUSG00000003444	Med29	1076.53	protein_coding	0.967373659205683	4.65802752849331	12.9545709990077	3.67237799220856e-06	8.6346859380184e-05	5.13479849478197
ENSMUSG00000038102	Trappc11	4097.61695316368	protein_coding	-0.499532473520071	6.16225946286454	-12.917983230251	3.74343816354604e-06	8.77430369550662e-05	5.13367279605586
ENSMUSG00000034462	Pkd2	4540.46068752055	protein_coding	-0.648051596513484	5.53129237804935	-12.8097737294571	3.96292379760814e-06	9.13108484268369e-05	5.13349516960946
ENSMUSG00000037149	Ddx1	2302.53	protein_coding	-0.226789923743338	7.96175250049617	-13.8579721560859	2.32319993543846e-06	6.21083940035501e-05	5.12346578022116
ENSMUSG00000020532	Acaca	3533.7315953344	protein_coding	-0.392096357550012	6.7217992614064	-13.0963095254897	3.41120939549152e-06	8.25974465150079e-05	5.1218832470323
ENSMUSG00000027365	Trpm7	4715.08334971866	protein_coding	-0.324923901458671	6.9741505754663	-13.2156337188468	3.207635820911e-06	7.89404166933289e-05	5.12154016329348
ENSMUSG00000096391	Gm23686	59.7804	snRNA	3.11145404511616	3.16365539579091	20.7088962655266	1.46786745215263e-07	8.22909497569671e-06	5.11783787067886
ENSMUSG00000096385	Gm11168	468.160401739233	protein_coding	1.9631482169079	3.76039772583177	14.2258362939892	1.94342571992336e-06	5.47653402521794e-05	5.11617792340061
ENSMUSG00000043131	Mob1a	3072.03655044433	protein_coding	-0.556624310451999	5.60400707578449	-12.7814589475525	4.02274652518437e-06	9.22744353704315e-05	5.11528393345705
ENSMUSG00000032097	Ddx6	5860.53	protein_coding	-0.342384097228399	7.36436270662434	-13.4180180579797	2.89314181568251e-06	7.33362457507649e-05	5.11419403105098
ENSMUSG00000093989	Rnasek	368.822260384328	protein_coding	1.22102210996256	3.68722451741435	13.9792118446741	2.18940932956936e-06	5.96460208016588e-05	5.1138304614317
ENSMUSG00000036568	Gltscr1l	6374.53	protein_coding	-0.469422319686506	6.01769757120623	-12.8447483132416	3.89042177529875e-06	9.00641632711497e-05	5.11278312627413
ENSMUSG00000026775	Yme1l1	3390.73802178817	protein_coding	-0.245074470743215	7.91830912383505	-13.8032999236785	2.38655754679126e-06	6.34073101003807e-05	5.11266233107627
ENSMUSG00000031974	Abcb10	4101.53	protein_coding	-0.616946893530291	5.37472635618167	-12.7490839554141	4.09240939833641e-06	9.34443845065432e-05	5.10366031409032
ENSMUSG00000021036	Sptlc2	877.391587723186	protein_coding	-0.428480705434887	6.26024720528606	-12.8869208119399	3.8049959059584e-06	8.85641533525514e-05	5.10001695444362
ENSMUSG00000005312	Ubqln1	3472.16239292693	protein_coding	-0.404220526850126	7.32588527260796	-13.3651474545358	2.97177599805408e-06	7.44975208848456e-05	5.09947329195348
ENSMUSG00000040848	Sft2d2	4558.69213350892	protein_coding	-0.777954193874987	4.99347915738957	-12.775799866091	4.03482561454448e-06	9.24809114351237e-05	5.09764801756953
ENSMUSG00000013822	Elof1	667.028511997579	protein_coding	0.811898561788879	5.04552776542698	12.7583582362269	4.07231428399321e-06	9.31270714761888e-05	5.09556459707274
ENSMUSG00000005161	Prdx2	555.95132753339	protein_coding	0.420294339784022	7.01136100536355	13.1882261556065	3.25314336804865e-06	7.97989429114237e-05	5.09356497773942
ENSMUSG00000029623	Pdap1	1281.40093143175	protein_coding	0.27900092128973	7.34513303159797	13.3764378341887	2.95478181906772e-06	7.42825248757457e-05	5.09217299910266
ENSMUSG00000058587	Tmod3	3373.53	protein_coding	-0.537667352682556	5.82646669776171	-12.756026056209	4.07735697330674e-06	9.31714826546724e-05	5.08588446750137
ENSMUSG00000030095	Tmem43	2053.54642359804	protein_coding	0.718411195163422	4.85405262546484	12.7717377700011	4.04352142429201e-06	9.26095848159685e-05	5.08369302858435
ENSMUSG00000045983	Eif4g1	3156.29954147054	protein_coding	-0.146359073305355	9.04476283327442	-14.8451813602203	1.45284673209442e-06	4.39201121254579e-05	5.07443292692611
ENSMUSG00000019659	Ccdc12	456.787075409573	protein_coding	0.720639544393872	5.25758276010821	12.692115862779	4.21834698516063e-06	9.55935961969018e-05	5.07261121380113
ENSMUSG00000020124	Usp15	3022.53	protein_coding	-0.340406823556644	7.06891430433125	-13.1737876473718	3.27741209817377e-06	8.02126184359934e-05	5.07123100929261
ENSMUSG00000091952	Gm17709	891.532	processed_pseudogene	-1.71831428518975	3.69836469268456	-14.2118139426313	1.95653724792576e-06	5.49971821916943e-05	5.0699106530482
ENSMUSG00000003380	Rabac1	433.84207135815	protein_coding	0.645361403183271	5.87192962689272	12.7336044644434	4.1262013256388e-06	9.40730073096513e-05	5.06816861414289
ENSMUSG00000022387	Brd1	3185.47317888324	protein_coding	-0.393855056652572	6.85281205743245	-13.0549894940074	3.48509854630207e-06	8.37789809742646e-05	5.06580026096985
ENSMUSG00000010342	Tex14	2973.29055670163	protein_coding	-0.790120483497294	5.21859350136371	-12.6779778058534	4.25028015757366e-06	9.6140114485606e-05	5.06299091689509
ENSMUSG00000040269	Mrps28	578.532	protein_coding	0.754070942944034	5.17929651153648	12.6751571924248	4.25668381765535e-06	9.6140114485606e-05	5.06126039961604
ENSMUSG00000032946	Rasgrp2	542.562937987925	protein_coding	0.556454457121462	5.52786725102065	12.6584485928189	4.29484315787699e-06	9.68886952335178e-05	5.05188391967292
ENSMUSG00000078671	Chd2	1813.1937775132	protein_coding	-0.346833441840082	6.86154848923262	-13.0159701922655	3.55654837862489e-06	8.47507709986513e-05	5.04059001065132
ENSMUSG00000054263	Lifr	6358.24692229364	protein_coding	-0.403207416799201	6.42220300826399	-12.8302908464347	3.92020756732471e-06	9.0683846951917e-05	5.03855397859304
ENSMUSG00000040034	Nup43	1087.87536154432	protein_coding	0.470713251572765	6.40362621943656	12.8229073349314	3.93551930744565e-06	9.08282793160018e-05	5.03601093832989
ENSMUSG00000028152	Tspan5	1881.63048808499	protein_coding	-1.04610855354807	4.265283401604	-13.0087845694542	3.56988710631829e-06	8.49339173853984e-05	5.03443716708617
ENSMUSG00000000544	Gpa33	1783.31694411507	protein_coding	-0.431345224946385	6.9685588586156	-13.0507880470092	3.49271304345133e-06	8.38279027497357e-05	5.03299021464925
ENSMUSG00000083061	Gm12191	157.693	processed_pseudogene	0.254151787444187	8.72626068520455	14.3987162114416	1.78972492820162e-06	5.16471177332296e-05	5.02862381523079
ENSMUSG00000002372	Ranbp3	2306.53	protein_coding	0.352759382456857	6.79364037744693	12.9657158736207	3.65103827115262e-06	8.59123328190016e-05	5.02678671165194
ENSMUSG00000024222	Fkbp5	2404.21518545835	protein_coding	-0.370079878697689	6.88650429435466	-12.9943562800256	3.59684260093749e-06	8.52377944129106e-05	5.02222712198661
ENSMUSG00000046711	Hmga1	930.788923038659	protein_coding	0.264381574001466	7.64730311576188	13.4474048948819	2.85045958997101e-06	7.25876781517279e-05	5.02165859407134
ENSMUSG00000019916	P4ha1	2582.61223222069	protein_coding	-1.21694426613011	4.42877369275343	-12.8802212870686	3.81842304870811e-06	8.88078902404258e-05	5.01970185466574
ENSMUSG00000085396	Firre	2396.12670017436	processed_transcript	-0.390577138550086	7.01290821050823	-13.0319499645838	3.5270876572423e-06	8.44258995287433e-05	5.00872803207486
ENSMUSG00000030879	Mrpl17	328.53193667762	protein_coding	0.472908845232427	5.99939498941248	12.6401783165457	4.33701487902297e-06	9.76933733881268e-05	5.00008510989452
ENSMUSG00000061286	Exosc5	833.637846673503	protein_coding	0.388218868422663	6.74866894476137	12.897351155387	3.78419819139272e-06	8.83580579260683e-05	4.99993927359762
ENSMUSG00000049751	Rpl36al	329.501282998787	protein_coding	0.423165554710016	6.30329252637935	12.713122491865	4.17140238961046e-06	9.46725607291575e-05	4.99270625820559
ENSMUSG00000038722	Bud31	562.377391581265	protein_coding	0.555525452886116	5.64614351188209	12.5550397268098	4.53984501840853e-06	0.00010123662158339	4.98925537862678
ENSMUSG00000031387	Renbp	487.119182054127	protein_coding	0.359511449716835	6.99691411037213	12.9947066581091	3.59618527517938e-06	8.52377944129106e-05	4.98765475755471
ENSMUSG00000017686	Rhot1	2660.55030375907	protein_coding	-0.447691685165748	6.37078038528979	-12.7189881991035	4.15840026687135e-06	9.44488054567024e-05	4.98651360846122
ENSMUSG00000078498	Gm13151	2595.53	protein_coding	-0.71633440573866	5.98837627762687	-12.5960427223508	4.44084550802895e-06	9.9510042260076e-05	4.98231013153032
ENSMUSG00000039145	Camk1d	3697.63653511047	protein_coding	-0.845348304384208	4.55989985166704	-12.6743752861793	4.2584609264981e-06	9.6140114485606e-05	4.97755516746452
ENSMUSG00000021607	Mrpl36	694.532	protein_coding	0.745128093106379	4.71792259075936	12.5923076655137	4.44976127854819e-06	9.9561337795305e-05	4.97521947862642
ENSMUSG00000052684	Jun	2984.53	protein_coding	1.58362307102046	3.19268517790847	15.2340346676159	1.21734358707788e-06	3.86371647311265e-05	4.97366102988697
ENSMUSG00000064370	mt-Cytb	939.532	protein_coding	0.207872932983856	8.66986726168203	14.2361742871713	1.93382325072131e-06	5.46284764922247e-05	4.97244729082687
ENSMUSG00000050799	Hist1h2ba	187.04	protein_coding	2.37994809290467	3.47498015283712	14.9883445502123	1.36057662089474e-06	4.17183335523122e-05	4.96918401248344
ENSMUSG00000031805	Jak3	3760.34957701066	protein_coding	0.624471748808015	5.13653465505455	12.4924776817712	4.69577065772975e-06	0.000104135212172783	4.96459679237336
ENSMUSG00000094777	Hist1h2ap	278.275	protein_coding	0.939115006586354	7.20125235877958	13.032093623586	3.52682406532802e-06	8.44258995287433e-05	4.96372099178532
ENSMUSG00000034731	Dgkh	3762.53	protein_coding	-0.735818065629422	5.34811928048954	-12.4796770173443	4.72841928962674e-06	0.000104582666769509	4.96079173171748
ENSMUSG00000041879	Ipo9	1861.50038646633	protein_coding	-0.342255101707819	7.1598636568003	-13.0269673479077	3.53624386105692e-06	8.45350769935555e-05	4.96039914071141
ENSMUSG00000103034	Gm8797	286.123	protein_coding	0.312931903015862	7.67451045771014	13.3396610376621	3.01054820963971e-06	7.51692804248396e-05	4.95101257917222
ENSMUSG00000029426	Scarb2	4479.57959492245	protein_coding	-0.495064110334437	5.84041059555478	-12.5078094490071	4.65700307447969e-06	0.000103504648953432	4.94731366278158
ENSMUSG00000031157	Pqbp1	708.919162852427	protein_coding	0.691063297724261	4.95502999317477	12.4791108184022	4.72986935138484e-06	0.000104582666769509	4.94645492756424
ENSMUSG00000046323	Dppa3	618.860998616151	protein_coding	0.904938628598641	4.66016303274667	12.5558155578494	4.5379486831867e-06	0.00010123662158339	4.94449699989831
ENSMUSG00000015289	Lage3	596.765359418295	protein_coding	1.01463973041974	4.41221101704684	12.6761234415193	4.25448890072497e-06	9.6140114485606e-05	4.94362980271329
ENSMUSG00000034194	R3hcc1	1100.9213338089	protein_coding	0.789111464900386	4.49271876289047	12.6159367036165	4.39369834311907e-06	9.86006284633195e-05	4.94292765690748
ENSMUSG00000027379	Bub1	2127.12915705409	protein_coding	-0.308833922376015	7.32566306062825	-13.092153252197	3.41856055926823e-06	8.26422576391401e-05	4.94269940575953
ENSMUSG00000022536	Glyr1	3137.41115411037	protein_coding	-0.318049997447627	7.16340954857354	-12.9920968188611	3.60108473891006e-06	8.5271075901898e-05	4.93884148890419
ENSMUSG00000018727	Cpsf4l	1045.9535740199	protein_coding	0.820541277896358	5.08116174747364	12.4449467483297	4.8183078060665e-06	0.000106225481485321	4.93616318630619
ENSMUSG00000024026	Glo1	1635.50812559677	protein_coding	-0.304569216891456	7.30791562973017	-13.0514178883426	3.4915703453064e-06	8.38279027497357e-05	4.92536238632436
ENSMUSG00000030102	Itpr1	5789.35422584335	protein_coding	-0.520554481378448	6.42360329058819	-12.6233695163293	4.37622937466891e-06	9.83555097078728e-05	4.92315654209691
ENSMUSG00000004535	Tax1bp1	2526.45341436185	protein_coding	-0.41973415802663	7.20589984670066	-12.979134421837	3.62553185461542e-06	8.55802095045865e-05	4.92079263991749
ENSMUSG00000035437	Rabgap1	1847.12419172043	protein_coding	-0.370267852997253	6.82971897921335	-12.7892884390146	4.00610250596278e-06	9.21035762828427e-05	4.92053720343597
ENSMUSG00000015575	Atp6v0e	622.791062009205	protein_coding	0.537302780013572	5.66056272295509	12.4213266325952	4.88055081220398e-06	0.000107257360321918	4.9143658833797
ENSMUSG00000025907	Rb1cc1	1973.78580409691	protein_coding	-0.538962442105034	5.93942227715611	-12.4643949573681	4.76773522743999e-06	0.000105342408712753	4.9121962081581
ENSMUSG00000040331	Nsmce4a	973.264371232704	protein_coding	0.36212096282806	6.69811529705164	12.7217479291916	4.15229889899955e-06	9.43815655189391e-05	4.91204597814646
ENSMUSG00000003868	Ruvbl2	1519.91362539049	protein_coding	0.345810638522744	7.5267181137093	13.1672865070235	3.28840660837085e-06	8.04014077908345e-05	4.91030470646846
ENSMUSG00000020303	Stc2	3255.08054385305	protein_coding	-0.762371150143565	4.97132876347169	-12.4075210238954	4.91735389209227e-06	0.000107776489499256	4.90784811413202
ENSMUSG00000014850	Msh3	2162.82826076766	protein_coding	-0.498598091593916	5.79451485753609	-12.4204192328688	4.88296012913521e-06	0.000107257360321918	4.90324053902742
ENSMUSG00000019158	Tmem160	609.532	protein_coding	0.773165364069601	4.54530299895817	12.5063606872117	4.66065077645435e-06	0.000103509161257706	4.90169463448927
ENSMUSG00000006589	Aprt	661.532	protein_coding	0.451843183078894	6.46166572037225	12.6070907662517	4.4145919051436e-06	9.89955762370597e-05	4.90149448011803
ENSMUSG00000031807	Pgls	630.125381280998	protein_coding	0.751715276862233	5.28275928647135	12.3680871364456	5.02422639848667e-06	0.000109718734773347	4.90082113742906
ENSMUSG00000031918	Mtmr2	1983.50377778582	protein_coding	-0.429458925027305	6.15983908861569	-12.4846137809088	4.71579739682725e-06	0.000104425199688476	4.89053874214693
ENSMUSG00000021457	Syk	4430.26014350468	protein_coding	-0.651005114195621	5.07697270114643	-12.3589856799699	5.04926631516164e-06	0.000110185478216625	4.8904414226041
ENSMUSG00000027472	Pdrg1	545.64671845568	protein_coding	0.982369503943791	4.0644147839145	12.8111602992387	3.96002037088018e-06	9.13108484268369e-05	4.88985836550335
ENSMUSG00000027411	Vps16	653.793286499349	protein_coding	-0.380107198986606	6.45400106479175	-12.5754549131253	4.49024351197349e-06	0.000100392356615544	4.88699919483755
ENSMUSG00000022565	Plec	10162.9576063994	protein_coding	-0.46135609699504	6.83893459097751	-12.7258072647764	4.14334277517982e-06	9.42492861857521e-05	4.88378488839105
ENSMUSG00000068101	Cenpm	996.532	protein_coding	0.886445134723185	4.49598791691494	12.4940696120803	4.69172831648516e-06	0.000104122410769618	4.88238156858795
ENSMUSG00000054808	Actn4	1814.25760665013	protein_coding	-0.260119486994584	7.71305525478555	-13.2388546303559	3.16964574972697e-06	7.84552595828219e-05	4.88202396357459
ENSMUSG00000026456	Cyb5r1	856.361086607202	protein_coding	-0.378182943545273	6.7397338764496	-12.6810521114533	4.2433130082823e-06	9.60868972011114e-05	4.881686433427
ENSMUSG00000096519	Gm10721	464.532	protein_coding	3.81558380851016	3.23757390169976	22.238139504381	8.95636319081142e-08	5.69007001455226e-06	4.88151639540825
ENSMUSG00000006412	Pfdn2	371.63714736085	protein_coding	0.840526358525033	4.77133610803152	12.3935857912261	4.95482274647168e-06	0.00010841342623879	4.88138560963656
ENSMUSG00000065794	Gm25514	50.1726	snRNA	3.18156846081243	3.27159101552385	17.6411063770483	4.44449857629581e-07	1.83348866771509e-05	4.87977448664658
ENSMUSG00000037740	Mrps26	953.052903839912	protein_coding	0.647602389612882	5.20204880960962	12.3285260435609	5.13410429039795e-06	0.000110906979224234	4.87897787470171
ENSMUSG00000029468	P2rx7	2844.62394002232	protein_coding	1.20222356768759	4.01094892028386	12.8747439456851	3.82944073506951e-06	8.88578105390763e-05	4.87819274717564
ENSMUSG00000039994	Timeless	1291.23541465054	protein_coding	-0.426869015153926	6.6381848875202	-12.6296792393709	4.36146189065676e-06	9.81704631852771e-05	4.87798707822174
ENSMUSG00000028405	Aco1	3627.53	protein_coding	-0.395194749652934	6.37778124536572	-12.5296257886796	4.60246424894568e-06	0.000102444035715977	4.87641288492986
ENSMUSG00000054099	Slc25a40	1483.55772159012	protein_coding	-0.645432896643338	5.08926743981911	-12.3274850579573	5.13703220373536e-06	0.000110906979224234	4.87440960938508
ENSMUSG00000056267	Cep70	1481.33565305624	protein_coding	-0.737654361251828	4.93754075758091	-12.3453897979608	5.08693593142118e-06	0.000110766186813967	4.87296027972535
ENSMUSG00000040029	Ipo8	2745.68891571306	protein_coding	-0.3547962143428	6.63873739331378	-12.6182191347985	4.38832563970713e-06	9.8553660050493e-05	4.86981656586441
ENSMUSG00000029145	Eif2b4	393.461194884833	protein_coding	0.57301225154638	5.60389937403131	12.3274338913831	5.13717616559409e-06	0.000110906979224234	4.86650374547295
ENSMUSG00000017485	Top2b	3259.60730588785	protein_coding	-0.500395102422098	6.09846367099875	-12.4120883903454	4.9051433744952e-06	0.000107587338146136	4.85991019375789
ENSMUSG00000024346	Pfdn1	872.532	protein_coding	0.513302031543119	6.04850937147538	12.3885227052441	4.96851658483863e-06	0.000108581058078412	4.85156627589567
ENSMUSG00000073676	Hspe1	572.73851927778	protein_coding	0.291413303762561	7.3812473831612	12.9708120030622	3.64132742650788e-06	8.57509779303568e-05	4.8496137400471
ENSMUSG00000027593	Raly	773.276483234757	protein_coding	0.310779294694544	7.59182694061685	13.1019285276338	3.40129967698284e-06	8.2473615967437e-05	4.8477911974283
ENSMUSG00000024780	Cdc37l1	2312.53	protein_coding	-0.601079481087906	5.84430558154213	-12.3272504715041	5.13769227196026e-06	0.000110906979224234	4.84673193571811
ENSMUSG00000032411	Tfdp2	3035.50256058164	protein_coding	-0.390294225506072	6.58521167082283	-12.5543706626524	4.54148111066624e-06	0.00010123662158339	4.8460819922104
ENSMUSG00000067575	Rpl35a-ps3	146.429	processed_pseudogene	0.546178507001211	5.84941186806813	12.3303635464895	5.12894069131686e-06	0.000110906979224234	4.84512716004687
ENSMUSG00000081214	Rpl35a-ps2	146.429	processed_pseudogene	0.546178507001211	5.84941186806813	12.3303635464895	5.12894069131686e-06	0.000110906979224234	4.84512716004687
ENSMUSG00000083424	Rpl35a-ps4	146.429	processed_pseudogene	0.546178507001211	5.84941186806813	12.3303635464895	5.12894069131686e-06	0.000110906979224234	4.84512716004687
ENSMUSG00000094664	Rpl35a-ps6	146.429	processed_pseudogene	0.546178507001211	5.84941186806813	12.3303635464895	5.12894069131686e-06	0.000110906979224234	4.84512716004687
ENSMUSG00000095526	Gm10243	146.429	processed_pseudogene	0.546178507001211	5.84941186806813	12.3303635464895	5.12894069131686e-06	0.000110906979224234	4.84512716004687
ENSMUSG00000024422	Dhx16	697.173038592931	protein_coding	0.255731171602876	7.45994265872842	12.9826497046176	3.61888342315023e-06	8.54904308036489e-05	4.82787926877824
ENSMUSG00000024944	Arl2	1087.61947940011	protein_coding	0.777048631922419	4.60729519317879	12.3317825444648	5.12495717901539e-06	0.000110906979224234	4.82663737517487
ENSMUSG00000061313	Ddhd2	4062.53	protein_coding	-0.613371484188858	6.11278039083297	-12.3474810722227	5.0811209823561e-06	0.000110766186813967	4.82250506847536
ENSMUSG00000068079	Tcf15	775.532	protein_coding	0.847272992053254	4.53937851226331	12.346444378906	5.08400264312734e-06	0.000110766186813967	4.82016551449699
ENSMUSG00000029048	Rer1	1183.62440401419	protein_coding	0.473424709665255	5.91348443172313	12.3000680699896	5.21483362996489e-06	0.000112249667440412	4.81941559636399
ENSMUSG00000044927	H1fx	1012.53	protein_coding	1.30650365161269	4.80524082351741	12.2813493694534	5.26872112546157e-06	0.000113247354148065	4.81889424896294
ENSMUSG00000024800	Rpp30	950.532	protein_coding	0.615097409215248	5.37032467065758	12.2030468573405	5.50110572562596e-06	0.000117349884081868	4.8092284734508
ENSMUSG00000034022	Cpsf1	4310.53	protein_coding	-0.39614444106645	7.17557159709033	-12.7675737225431	4.05245760589158e-06	9.27435632897457e-05	4.80759021424218
ENSMUSG00000021238	Aldh6a1	3135.53	protein_coding	-0.696815834766142	5.35122903226927	-12.1962435500863	5.52184044387119e-06	0.000117428013798928	4.8066619594582
ENSMUSG00000031561	Tenm3	3735.51066301442	protein_coding	-0.674536054247062	5.14119122290894	-12.1976150983469	5.51765318261767e-06	0.000117422068331784	4.80662637001538
ENSMUSG00000022899	Slc15a2	920.704852181618	protein_coding	-0.817303281565987	4.39323402460094	-12.3974481076877	4.9444054002014e-06	0.000108290406611262	4.80633950559604
ENSMUSG00000020843	Timm22	573.648810330585	protein_coding	0.765102758313627	4.61182073982986	12.2761231857647	5.28387910167812e-06	0.00011349198222039	4.79961270055843
ENSMUSG00000024050	Wiz	2568.64349726923	protein_coding	0.397054502167774	7.28247539891329	12.8085230028538	3.9655448499791e-06	9.13108484268369e-05	4.79144716830467
ENSMUSG00000096210	H1f0	2082.53	protein_coding	0.500943850525179	6.11957070089328	12.3001993708907	5.2144578589172e-06	0.000112249667440412	4.78953826223115
ENSMUSG00000017291	Taok1	12204.5	protein_coding	-0.313406599998435	7.46752034733582	-12.9112778999315	3.75662998078154e-06	8.79836120752179e-05	4.78905177276351
ENSMUSG00000003402	Prkcsh	1794.24963435599	protein_coding	-0.486471042001231	6.57357327373973	-12.446832975082	4.81337630752866e-06	0.000106194673028582	4.78836068113604
ENSMUSG00000073616	Myeov2	243.506960256352	protein_coding	0.874105365574517	4.21940800836177	12.4433208574292	4.82256327111919e-06	0.000106241351711042	4.78555304350356
ENSMUSG00000020850	Prpf8	7131.65356057578	protein_coding	-0.220524121101002	8.66528361524672	-13.8661020416489	2.31394293282821e-06	6.20818492754955e-05	4.77920313045662
ENSMUSG00000024099	Ndufv2	763.651542796167	protein_coding	0.335809836622269	6.82262420905763	12.5407660403441	4.57489490658684e-06	0.0001019058688273	4.77448893325949
ENSMUSG00000021360	Gcnt2	4074.98412999401	protein_coding	-0.592848877871689	5.74279928473046	-12.1782743259119	5.57703439662658e-06	0.000118434138928786	4.77262329941444
ENSMUSG00000031004	Mki67	9870.53	protein_coding	0.184920708985588	8.21535094156271	13.4425727431159	2.85742847298674e-06	7.27035293689912e-05	4.77055400275319
ENSMUSG00000049960	Mrps16	361.581	protein_coding	0.724326612250194	5.08083892169143	12.1131989782362	5.78223099298015e-06	0.000121588704764213	4.75968922516224
ENSMUSG00000074797	Itpa	671.862746049509	protein_coding	0.628865917185349	5.81518459778157	12.1606979090603	5.6316290989758e-06	0.000119088545246393	4.75304094426071
ENSMUSG00000049881	2810025M15Rik	286.600987723947	transcribed_processed_pseudogene	0.506431932171522	5.58672159093902	12.1196537212146	5.7614990975496e-06	0.000121398782117666	4.75062452424652
ENSMUSG00000036990	Otud4	2781.12586645126	protein_coding	-0.263317046973794	7.55238191091841	-12.8972599292104	3.78437953179307e-06	8.83580579260683e-05	4.74794535553423
ENSMUSG00000010362	Rdm1	514.674080687996	protein_coding	0.795178726364549	5.22340646029302	12.0873496764871	5.86610979445914e-06	0.000122779263995324	4.74772815264042
ENSMUSG00000003283	Hck	1887.38052584761	protein_coding	-0.636994770652974	5.00591602831508	-12.0803023829792	5.88921692127922e-06	0.000122977817420097	4.73820008293593
ENSMUSG00000020358	Hnrnpab	1549.31505416717	protein_coding	0.164628125064484	8.86478959806059	14.0108709579326	2.15593127127297e-06	5.87872765612355e-05	4.73547458593653
ENSMUSG00000037242	Clic4	3895.1304797733	protein_coding	-0.380804876084801	7.33418361894968	-12.7291011763185	4.13609154681989e-06	9.41556173412053e-05	4.73211276262519
ENSMUSG00000013415	Igf2bp1	3311.9799336818	protein_coding	-0.244802313905499	8.22292445378997	-13.3669180429252	2.96910358937283e-06	7.44975208848456e-05	4.72992571011573
ENSMUSG00000036748	Cuedc2	1722.06382873204	protein_coding	0.571061504740594	6.03000148264198	12.1703276537444	5.60164298650398e-06	0.00011870505648904	4.72920797706189
ENSMUSG00000022010	Tsc22d1	1246.19533116145	protein_coding	-0.397873681471351	7.45303952110079	-12.7866901832761	4.01161721146302e-06	9.21598513664008e-05	4.72410328639469
ENSMUSG00000024900	Cpt1a	4095.53	protein_coding	-0.405130537386838	6.26028036728191	-12.2264789452586	5.43036498553785e-06	0.000116305800035942	4.72345408410375
ENSMUSG00000023942	Slc29a1	904.42254950966	protein_coding	0.276315408359578	8.06620511920909	13.2341013958166	3.17738033949826e-06	7.85173534716967e-05	4.72312033642166
ENSMUSG00000024309	Pfdn6	364.502332127803	protein_coding	0.509239074237247	6.3648020505797	12.2300526327254	5.41966725077999e-06	0.000116159473051846	4.7033868807818
ENSMUSG00000004891	Nes	5869.76188950484	protein_coding	1.72091533704028	3.32416127645135	13.882923199464	2.29492263544898e-06	6.17058334189894e-05	4.70262267068657
ENSMUSG00000052566	Hook2	2412.53	protein_coding	-0.496718555175323	6.35290872864376	-12.21446233535	5.46651277379889e-06	0.000116844239400602	4.70002468369377
ENSMUSG00000020075	Ddx21	4537.53	protein_coding	-0.15127630566316	8.72677407560977	-13.7901782241598	2.40205484514247e-06	6.36502169679773e-05	4.69935081084775
ENSMUSG00000034636	Zyg11b	8219.40525731812	protein_coding	-0.39380188221987	6.29946884918806	-12.1980990770397	5.51617648370516e-06	0.000117422068331784	4.69915251553185
ENSMUSG00000096696	Zfp960	2462.53	protein_coding	-0.561502523129398	6.24761384900551	-12.1683424217011	5.60780993484502e-06	0.000118751994878195	4.69442110997828
ENSMUSG00000065178	Gm22126	52.4324	snRNA	3.34598310822549	3.02061439930541	20.4785010124303	1.58613628913484e-07	8.6500561437773e-06	4.69355674374141
ENSMUSG00000002222	Rmnd5a	5176.47855581583	protein_coding	-0.463257299580335	5.89389115870237	-12.072400331453	5.91524977680132e-06	0.000123349993437268	4.69286461437914
ENSMUSG00000032570	Atp2c1	1484.18065760189	protein_coding	-0.608224080901827	6.19526607440759	-12.145122437116	5.68051657301065e-06	0.000120037863925736	4.69111055500192
ENSMUSG00000041763	Tpp2	3670.26321425246	protein_coding	-0.404917012569899	6.8874384989928	-12.4121497768948	4.90497949694337e-06	0.000107587338146136	4.68559987577003
ENSMUSG00000082195	Gm13034	2972.53	processed_pseudogene	-0.939088091019714	4.52226138129555	-12.0930912855062	5.84735997105795e-06	0.000122529511694784	4.68097284158722
ENSMUSG00000064451	Snora23	66.9197	snoRNA	1.13453921406932	3.80174693124872	12.626387569567	4.36915874340888e-06	9.82700981142916e-05	4.68080433957563
ENSMUSG00000020859	Spag9	4050.97808192579	protein_coding	-0.47008390098441	5.97243180501932	-12.0625741269414	5.94780422907963e-06	0.000123873631081533	4.67641995866236
ENSMUSG00000106831	Ube2n-ps1	255.92	processed_pseudogene	0.567895883783397	5.48578925101896	11.9668687836363	6.2757543428731e-06	0.000129519328467716	4.67106204061876
ENSMUSG00000003438	Timm50	855.3718797796	protein_coding	0.486593328955373	6.37127977112154	12.1751976299266	5.58654744827073e-06	0.000118468711554754	4.66951126021842
ENSMUSG00000033159	Cnppd1	1023.76673872826	protein_coding	1.20600096844378	3.56947438907091	12.9445759940845	3.69163668523302e-06	8.66640552770054e-05	4.66624511808258
ENSMUSG00000018363	Smurf2	3684.063997254	protein_coding	-0.650950849763986	5.55712972638285	-11.9547291109475	6.31880270400255e-06	0.000130228876853616	4.66128396877276
ENSMUSG00000046897	Zfp740	2359.04503717044	protein_coding	-0.426273733033252	6.84523446484391	-12.323993378098	5.14686689404707e-06	0.000111025271571587	4.64570528791011
ENSMUSG00000022432	Smc1b	3833.53	protein_coding	-1.3577132646312	3.75314907214622	-12.7097759551354	4.17884113773944e-06	9.47698093191943e-05	4.63884948195483
ENSMUSG00000025503	Taldo1	1020.73185923607	protein_coding	0.23836144388293	7.65247672544617	12.7843759904205	4.01653627142281e-06	9.22023670129748e-05	4.63864708213093
ENSMUSG00000056153	Socs6	2024.32126550632	protein_coding	-0.510545914934415	5.59453246572338	-11.9125197978918	6.47111321400055e-06	0.000132110536727418	4.63285244539348
ENSMUSG00000022749	Tbc1d23	3443.53	protein_coding	-0.597745466129973	5.48965767175345	-11.8940461307492	6.53908370332919e-06	0.00013303515653442	4.63054262409873
ENSMUSG00000020823	Sec14l1	3621.9088351413	protein_coding	-0.358829313757414	6.65624381082256	-12.2142445880562	5.4671703084045e-06	0.000116844239400602	4.62851504842771
ENSMUSG00000002767	Mrpl2	554.843196045452	protein_coding	0.362830252227609	6.62026657940581	12.2037670251935	5.49891602397603e-06	0.000117349884081868	4.62814058181282
ENSMUSG00000022533	Atp13a3	3165.15409080027	protein_coding	-0.318698097988682	7.15505455985091	-12.4541310922469	4.79434950544638e-06	0.000105852614466685	4.62761147608505
ENSMUSG00000024614	Tmx3	4406.53	protein_coding	-0.579197344134384	5.71457579735283	-11.9069020183597	6.49169750785883e-06	0.000132250181975356	4.619051813054
ENSMUSG00000027282	Mtch2	988.113393474702	protein_coding	0.337890440839798	7.14231361115473	12.4320186990774	4.85226288968742e-06	0.000106739127066045	4.61504018390452
ENSMUSG00000041488	Stx3	2896.19035737909	protein_coding	-0.374104752375674	6.45384912813193	-12.1088867763007	5.79612852345694e-06	0.000121701219773677	4.61376334984984
ENSMUSG00000063884	Ptcd3	1233.89739606278	protein_coding	-0.355573023977366	6.69844853590504	-12.2025735429453	5.50254539822797e-06	0.000117349884081868	4.61077453449782
ENSMUSG00000015647	Lama5	5666.72131165431	protein_coding	-0.339823288228073	6.99025032230574	-12.3379041466642	5.10781243718034e-06	0.000110906979224234	4.61004822432641
ENSMUSG00000055675	Kbtbd11	5897.57267707324	protein_coding	-1.01887922305065	4.18092747533073	-12.1171229015235	5.76961771789465e-06	0.000121408433336846	4.60116253026571
ENSMUSG00000072244	Trim6	1637.78363916117	protein_coding	-0.461829984944663	6.61436321842053	-12.136193292206	5.70876029692304e-06	0.000120465265563371	4.59444252179189
ENSMUSG00000022427	Tomm22	777.063920568061	protein_coding	0.485462324388029	6.28184936758116	12.0065427911733	6.137373425759e-06	0.000127099885644819	4.58739453585364
ENSMUSG00000078087	Rps12l1	200.113	processed_pseudogene	0.161322089258785	9.39578154344194	14.3871322988391	1.7995800996233e-06	5.18461959861751e-05	4.58528295313238
ENSMUSG00000021703	Serinc5	5111.53	protein_coding	-0.970322465472357	4.19735397664453	-12.0610932659943	5.95272798701231e-06	0.000123873631081533	4.58303016936854
ENSMUSG00000079139	Gm4204	1026.53	processed_pseudogene	-0.610723938175494	6.31362647927257	-11.9908585558646	6.19166066089538e-06	0.000128135820385155	4.57771417578993
ENSMUSG00000035585	Tsen34	489.094650644783	protein_coding	0.543723137673905	5.63522934677993	11.8260045895565	6.79651974284856e-06	0.000137066189095877	4.57752840770919
ENSMUSG00000032715	Trib3	1264.08566662081	protein_coding	-0.684475220360685	5.88559827040192	-11.8632713097844	6.65412301039172e-06	0.000134977433527047	4.57457614160673
ENSMUSG00000034867	Ankrd27	1954.26346952417	protein_coding	-0.409566466384774	6.42285838228942	-12.030543972686	6.05534276280037e-06	0.000125747750296744	4.57434537157352
ENSMUSG00000052316	Lrrc15	5105.53	protein_coding	0.953311197617286	3.9072168795817	12.234006602241	5.40785904970107e-06	0.00011598911961775	4.57298727030448
ENSMUSG00000027957	Slc35a3	2553.63059185015	protein_coding	-0.629581385162278	4.97076807594434	-11.7764560210006	6.99123831227002e-06	0.000140053146696935	4.57059554402433
ENSMUSG00000041225	Arhgap12	1532.47789688399	protein_coding	-0.468965104067704	6.53267403394457	-12.0616323267265	5.9509351122895e-06	0.000123873631081533	4.56945080368747
ENSMUSG00000038462	Uqcrfs1	1158.53	protein_coding	0.406629757689168	6.37493373681686	12.0087481178339	6.12978366786544e-06	0.000127030254783234	4.56854699075875
ENSMUSG00000024542	Cep192	7886.53	protein_coding	-0.314326093952567	7.40500131586367	-12.485303451737	4.71403715631308e-06	0.000104425199688476	4.56070699586568
ENSMUSG00000093656	Gm20628	3010.53	antisense	0.629320517910249	5.06540272156267	11.7526729291465	7.08694790027977e-06	0.000141404845587986	4.5605737692382
ENSMUSG00000079010	Gm11032	39.7316	protein_coding	0.983022498508612	4.31323532319001	11.9290637806945	6.41092328468718e-06	0.000131765960178909	4.55899117891959
ENSMUSG00000057789	Bak1	1276.71751084875	protein_coding	0.590390842916471	5.10270293113504	11.7428222593491	7.12702488885943e-06	0.000142015895812558	4.55540007699036
ENSMUSG00000020831	0610010K14Rik	377.720584663457	protein_coding	0.810705314654113	4.28622697931986	11.923348578694	6.43164399608485e-06	0.000131921140230958	4.55527317997683
ENSMUSG00000041852	Tcf20	7026.96322925613	protein_coding	-0.153898589194856	8.48790581323621	-13.3015777088193	3.06956097656854e-06	7.63553292921424e-05	4.55521272548296
ENSMUSG00000025745	Hadha	1112.19602207084	protein_coding	-0.321452467334828	6.93961571848953	-12.2218341300716	5.44430499295007e-06	0.000116521311063502	4.5550059262573
ENSMUSG00000039224	D1Pas1	3007.53	protein_coding	-1.22797282402377	4.03406370343772	-12.1649909028026	5.61823864782266e-06	0.000118889051498889	4.55472193669599
ENSMUSG00000022770	Dlg1	1112.42719179805	protein_coding	-0.326832554537886	6.84884608008151	-12.1766034479141	5.58219841527552e-06	0.000118460084873315	4.55404826467366
ENSMUSG00000001288	Rarg	2155.36558140088	protein_coding	0.417418434590362	6.32089895203152	11.963932087045	6.28613749584616e-06	0.000129644574888594	4.55312438088208
ENSMUSG00000021731	Mrps30	1385.53	protein_coding	0.47068684674136	5.99671918488294	11.8625062315267	6.65701209647856e-06	0.000134977433527047	4.55222330519963
ENSMUSG00000029060	Mib2	1751.38606472067	protein_coding	-0.570576090681202	5.27640951762414	-11.7259080591677	7.19644154394995e-06	0.000143114408970319	4.54382946215429
ENSMUSG00000019820	Utrn	12177.5	protein_coding	-0.203881838310712	7.93583172195068	-12.8062877902894	3.97023392456371e-06	9.13488202137941e-05	4.53590024196417
ENSMUSG00000062580	Timm17a	580.710770814254	protein_coding	0.463943776557789	5.87639937717324	11.8028220891724	6.8868460700423e-06	0.000138515955527912	4.53452067400294
ENSMUSG00000032288	Imp3	719.532	protein_coding	0.54250735867875	5.45984737230078	11.7200266119944	7.22075898354273e-06	0.000143218869106585	4.53025775361092
ENSMUSG00000041769	Ppp2r2d	1410.75401459409	protein_coding	-0.447134187786848	6.26034755733708	-11.8912141887836	6.5495748494774e-06	0.000133158440224592	4.52496278901751
ENSMUSG00000039262	Prrc2b	6010.94975221933	protein_coding	-0.247159921389959	7.60779912299738	-12.5555421072744	4.53861696558112e-06	0.00010123662158339	4.52454528821004
ENSMUSG00000032582	Rbm6	2177.42393158873	protein_coding	-0.341168254675003	6.62201949343592	-12.0261561764381	6.07024575662991e-06	0.000125883239986868	4.52372870000198
ENSMUSG00000057551	Zfp317	1619.53	protein_coding	-0.634203586799413	5.13132325597127	-11.6808558007633	7.38511606061811e-06	0.000145489410956484	4.52032838487629
ENSMUSG00000022043	Trim35	3428.18891069676	protein_coding	-0.403069915140208	6.28826057065125	-11.8842614130515	6.57541314268992e-06	0.000133593366818586	4.51449855614495
ENSMUSG00000049606	Zfp644	2831.33855716325	protein_coding	-0.377705159137077	6.456391024202	-11.9435485908351	6.35874681069391e-06	0.000130872591037357	4.51390266677349
ENSMUSG00000002580	Mien1	542.532	protein_coding	0.843716723173948	4.38793673949052	11.7976262061817	6.90727746454221e-06	0.000138798360563991	4.51326976223927
ENSMUSG00000027298	Tyro3	2347.60534899142	protein_coding	-0.567443291165044	6.08183155812435	-11.8082639861015	6.86552086497193e-06	0.000138272142407199	4.5098657351793
ENSMUSG00000028582	Cc2d1b	1010.2369268581	protein_coding	-0.384519584425576	6.39318064525027	-11.9099701366268	6.48044630890261e-06	0.000132110536727418	4.50773105049214
ENSMUSG00000037531	Mrpl47	621.74542996988	protein_coding	0.567893444351606	5.23376932125761	11.6574302637665	7.48543635801829e-06	0.00014720541696472	4.50513971461046
ENSMUSG00000034998	Foxn2	2313.56055217069	protein_coding	-0.4574877973185	5.9683118641955	-11.7703252223645	7.0157690805931e-06	0.000140450929448862	4.50384803651284
ENSMUSG00000038515	Grtp1	1105.53	protein_coding	-0.587161579817701	5.2666315272222	-11.6516877484081	7.51026442977602e-06	0.000147500611666889	4.50151545069972
ENSMUSG00000064068	Mtx1	366.222749245744	protein_coding	0.496839493443887	5.73999326756171	11.7050064455006	7.28328608079067e-06	0.000144046005791921	4.49436246619105
ENSMUSG00000029009	Mthfr	3027.44785856261	protein_coding	-0.604232751724518	5.35490183516412	-11.6444047636956	7.5418874536048e-06	0.000148024935397368	4.49392573249368
ENSMUSG00000028884	Rpa2	910.323886710185	protein_coding	0.339719975458393	6.63139867717315	11.9852818041662	6.21109457901094e-06	0.000128416730192525	4.49352821153636
ENSMUSG00000028452	Vcp	2595.7263228763	protein_coding	-0.204007873047207	8.57017030862191	-13.267202899234	3.12395893721528e-06	7.76442035602828e-05	4.49280551526688
ENSMUSG00000035842	Ddx11	3944.53	protein_coding	-0.649971199248923	5.61753584282607	-11.6560100519524	7.49156803118915e-06	0.000147229645369001	4.48223615341609
ENSMUSG00000082016	Pgam1-ps2	560.532	processed_pseudogene	0.254124759992578	7.52285005329627	12.4349681628179	4.84449234130747e-06	0.000106646264002892	4.48132089761705
ENSMUSG00000021270	Hsp90aa1	803.190165752744	protein_coding	-0.181038830849278	12.4334815424311	-24.6518253225996	4.37682640256197e-08	3.19998191169306e-06	4.47854700761335
ENSMUSG00000070738	Dgkd	3160.00341765652	protein_coding	-0.358955452695996	6.53104911550607	-11.9114334040958	6.4750881155817e-06	0.000132110536727418	4.47661071483586
ENSMUSG00000096544	Gm4617	144.973	processed_pseudogene	0.277697835711203	8.17158287223709	12.8943991806854	3.79007117541002e-06	8.84222428182421e-05	4.47617373775049
ENSMUSG00000026078	Pdcl3	581.437526844399	protein_coding	0.575607176490839	5.19823624813719	11.6037912370112	7.72103067429724e-06	0.000150265058764221	4.47513140761011
ENSMUSG00000092974	Gm25072	88.1122	misc_RNA	0.657772995942242	5.40356829322812	11.6174959498964	7.66004540119228e-06	0.000149562510890466	4.47466504398509
ENSMUSG00000001473	Tubb6	1552.53	protein_coding	0.714262731746356	5.29301109997507	11.6049328504382	7.71592955169793e-06	0.000150263102462068	4.47320024213687
ENSMUSG00000103509	Gm38372	3823.53	TEC	-1.09654997465139	3.62055950155789	-12.3926915972755	4.95723809950739e-06	0.00010841342623879	4.46859423387834
ENSMUSG00000073079	Srp54a	1310.53	protein_coding	-0.682849259482126	5.08143691767019	-11.5902697823911	7.781741459656e-06	0.000150834412138445	4.46854157333552
ENSMUSG00000029603	Dtx1	1106.42804841154	protein_coding	0.618041891761997	5.00670951773554	11.5901494399247	7.78228422125277e-06	0.000150834412138445	4.46790064582978
ENSMUSG00000043962	Thrap3	1127.47866136988	protein_coding	0.241185078137669	8.35649562707565	13.0309804359874	3.52886717721394e-06	8.44258995287433e-05	4.46404064566324
ENSMUSG00000078249	Hmga1-rs1	812.086517227999	protein_coding	0.266556888124869	8.18719004301982	12.8785850950585	3.82171047359269e-06	8.88156055846765e-05	4.45901801364356
ENSMUSG00000031333	Abcb7	5227.44182481703	protein_coding	-0.390139949146858	6.37078390212581	-11.8054756673621	6.87643808630634e-06	0.00013839925522801	4.44918656255386
ENSMUSG00000051695	Pcbp1	1625.53	protein_coding	0.591977776555721	6.11695986073156	11.7187928500576	7.2258719328388e-06	0.000143225742552687	4.44677822184431
ENSMUSG00000066362	Rps13-ps1	333.663	processed_pseudogene	0.742695410512913	6.50073502051665	11.8445963260522	6.72505226707752e-06	0.000136048382804295	4.44647944222404
ENSMUSG00000078713	Tomm5	380.924615896644	protein_coding	0.468974780105911	5.97004607287028	11.6770161351362	7.40145435295178e-06	0.000145649182614177	4.44496015560794
ENSMUSG00000042410	Agps	4065.90840845632	protein_coding	-0.266688046348526	7.48856845689409	-12.3421815733836	5.09587135426359e-06	0.000110880404289838	4.44245107203056
ENSMUSG00000016018	Skiv2l2	3104.53	protein_coding	-0.358490279071255	7.02093798617624	-12.0751650060973	5.90612687234694e-06	0.000123245282213301	4.44223320545616
ENSMUSG00000034926	Dhcr24	3823.53	protein_coding	-0.464282948956511	6.05936396937677	-11.6924794991981	7.33590483569939e-06	0.000144738413925102	4.44214335360878
ENSMUSG00000028633	Ctps	1831.03764514525	protein_coding	-0.297965639580764	6.94494748838922	-12.0390252853158	6.02665397217917e-06	0.000125238537489635	4.44196499999327
ENSMUSG00000092335	Gm7221	1220.53	protein_coding	-1.01287818435064	3.78419234965015	-12.1077705893213	5.79973199493843e-06	0.000121701219773677	4.44173007380237
ENSMUSG00000027359	Slc27a2	2175.50458651029	protein_coding	-0.711866684847089	4.79152721604093	-11.5619942858543	7.91045789814768e-06	0.000152568260193479	4.44058074241923
ENSMUSG00000026269	Rnpepl1	1403.57684461981	protein_coding	0.907866130488015	3.93165043409248	11.9177038616798	6.45218387773259e-06	0.000132110536727418	4.44014777004127
ENSMUSG00000064340	mt-Tl1	31.0109	Mt_tRNA	2.29146121575039	2.77354192909758	16.4341794378595	7.23733932574786e-07	2.66840256931776e-05	4.43912086880198
ENSMUSG00000076258	Gm23935	24.8224	miRNA	1.13068565973598	3.77886897447893	12.0844446331484	5.87562253736483e-06	0.000122779263995324	4.43797399470103
ENSMUSG00000076281	Gm24270	24.8224	miRNA	1.13068565973598	3.77886897447893	12.0844446331484	5.87562253736483e-06	0.000122779263995324	4.43797399470103
ENSMUSG00000087943	Gm24245	24.8224	miRNA	1.13068565973598	3.77886897447893	12.0844446331484	5.87562253736483e-06	0.000122779263995324	4.43797399470103
ENSMUSG00000006519	Cyba	553.532	protein_coding	0.711449817257654	4.90810326220306	11.536367905954	8.02920712112702e-06	0.000154264478761346	4.43439669993641
ENSMUSG00000038932	Tcfl5	1994.67389445715	protein_coding	-0.581634378895807	5.47168439722218	-11.5504027658709	7.96392262645647e-06	0.000153402507052814	4.43138804959325
ENSMUSG00000064061	Dzip3	3481.87103715901	protein_coding	-0.597403934578766	5.59199178715281	-11.5665430164461	7.88958879409439e-06	0.000152383446372553	4.43093051595667
ENSMUSG00000008730	Hipk1	3782.60247523915	protein_coding	-0.471641103786649	5.82393665614735	-11.6098541952486	7.69398305845318e-06	0.000150045609284547	4.42840316407433
ENSMUSG00000033417	Cacul1	5581.90258150654	protein_coding	-0.384834569888796	6.32995663626924	-11.7535341616677	7.08345620243231e-06	0.000141404845587986	4.42608852345271
ENSMUSG00000021951	N6amt2	631.532	protein_coding	1.04347485513205	3.7682020747907	12.0277480393289	6.06483423917023e-06	0.00012585787572709	4.41421967110964
ENSMUSG00000040875	Osbpl10	1873.43459188194	protein_coding	-0.976624926672312	3.91071425807783	-11.9181606441597	6.45051897847463e-06	0.000132110536727418	4.41384665052178
ENSMUSG00000034187	Nsf	1339.15158109263	protein_coding	-0.420462072232387	6.00589980361574	-11.6306606185735	7.60197800433625e-06	0.000148912540451304	4.41291672917867
ENSMUSG00000011256	Adam19	5680.13488936461	protein_coding	-0.422051470095334	6.00129890168373	-11.6218604109972	7.64073877127705e-06	0.000149409454772976	4.40835236819013
ENSMUSG00000092358	Gm20430	75.8682	processed_pseudogene	0.480829064257301	6.20463074381488	11.6823968481305	7.3785702204808e-06	0.000145484682779021	4.40659652975556
ENSMUSG00000027087	Itgav	3073.2831699899	protein_coding	-0.630499820613217	5.35482429136863	-11.4858910383067	8.26908019745098e-06	0.000158568979485134	4.40120287975918
ENSMUSG00000024811	Tnks2	1313.79098254915	protein_coding	-0.1598430018463	9.02549512078845	-13.578804952255	2.66816698374062e-06	6.91170255986396e-05	4.39986310711436
ENSMUSG00000021814	Anxa7	2654.74157289645	protein_coding	-0.338744558057192	6.84858919264271	-11.9156890817437	6.45953325723349e-06	0.000132110536727418	4.39527928007656
ENSMUSG00000020180	Snrpd3	1050.12956819362	protein_coding	0.415124168472779	6.11395883460536	11.6331591944961	7.59101369568101e-06	0.000148794762258003	4.39296857929045
ENSMUSG00000031976	Urb2	5813.26922616858	protein_coding	-0.271137098300538	7.24841055402221	-12.1185247747993	5.76511904162898e-06	0.000121398782117666	4.39256738295356
ENSMUSG00000052911	Lamb2	1815.84163361335	protein_coding	-0.655661438201681	5.11981288628497	-11.4570052348791	8.41000580032858e-06	0.000160656239220644	4.39192638693283
ENSMUSG00000092060	Bend4	7803.94889003486	protein_coding	-0.571261972557288	6.06410884371893	-11.595795676488	7.7568651431301e-06	0.000150767167325948	4.38412664916021
ENSMUSG00000024007	Ppil1	972.59115975255	protein_coding	0.363364274617604	6.41344318804797	11.7151142240741	7.24114130177785e-06	0.000143433787064682	4.38100703760276
ENSMUSG00000079426	Arpc4	847.974562491924	protein_coding	0.514508518058412	6.74558330517455	11.8397654225075	6.74354003747764e-06	0.000136272114718336	4.37657806912996
ENSMUSG00000034807	Colgalt1	2974.53	protein_coding	-0.409697076107595	6.14159267681849	-11.6075729797914	7.70414719842616e-06	0.000150130946281133	4.37469487503724
ENSMUSG00000016252	Atp5e	228.127792295364	protein_coding	0.702605621894493	5.55750582166793	11.4670505637901	8.36069045380194e-06	0.000160121343178008	4.37365728475346
ENSMUSG00000041859	Mcm3	2487.13490562177	protein_coding	-0.217003721812466	8.8236511771179	-13.3081003521184	3.05936097164182e-06	7.61646543801699e-05	4.37244993757602
ENSMUSG00000021470	Ercc6l2	1858.55063718637	protein_coding	-0.427407198449436	6.08317330900555	-11.5847293648273	7.80677416384828e-06	0.000151150616526725	4.37167637599948
ENSMUSG00000089911	Hiat1	2538.78795904196	protein_coding	-0.372992846585292	6.77902606531613	-11.8441721229341	6.72667337573389e-06	0.000136048382804295	4.37155072622232
ENSMUSG00000028121	Bcar3	2100.04685958835	protein_coding	-0.990901158056671	4.25180906301767	-11.602183951676	7.72821907352371e-06	0.000150307608375608	4.36961289556173
ENSMUSG00000027673	Ndufb5	352.038349524249	protein_coding	0.406666503677377	6.42679338813568	11.6989262346202	7.30877194244776e-06	0.000144297823980692	4.36837960791871
ENSMUSG00000009907	Vps4b	1595.97292264303	protein_coding	-0.443868455749845	6.22126974848328	-11.6203906488591	7.64723423211542e-06	0.000149409454772976	4.36766752829838
ENSMUSG00000036992	Nxt1	761.326184570703	protein_coding	0.535282601268837	5.44135192076161	11.4401503035416	8.49349537354899e-06	0.000161737035791998	4.36638154612452
ENSMUSG00000075609	Gm7935	1073.53	processed_pseudogene	1.75806884415829	3.78767996096084	12.0583663596517	5.96180687911199e-06	0.000123976702360163	4.35976867958544
ENSMUSG00000021710	Nln	3575.53	protein_coding	-0.488744615538844	5.72788922725872	-11.4612077605275	8.38933433860236e-06	0.000160465377174196	4.35121711926044
ENSMUSG00000020736	Nt5c	451.611966903798	protein_coding	1.17238580992922	3.74056703197505	11.9327403967497	6.39763364455209e-06	0.00013158281545869	4.34879151038682
ENSMUSG00000023883	Phf10	1262.20402799832	protein_coding	-0.494864879751751	6.66346679821851	-11.7472310356021	7.10905624849895e-06	0.000141751845528298	4.34566365110781
ENSMUSG00000003549	Ercc1	284.839568589077	protein_coding	0.698533514368534	4.74995320709332	11.3887602091697	8.75392007776253e-06	0.000165646438549551	4.34272519322958
ENSMUSG00000020708	Psmc5	1113.56224722778	protein_coding	0.270187414455572	7.44226987882139	12.1396782694299	5.69771804304507e-06	0.000120316745941997	4.33223734734067
ENSMUSG00000035493	Tgfbi	2473.53	protein_coding	-1.72261827535968	3.13509483478717	-13.3856408386318	2.94101127860507e-06	7.40774919621153e-05	4.32840349213864
ENSMUSG00000033257	Ttll4	2059.05164742081	protein_coding	-0.472854598875334	5.88713963854827	-11.4578519207164	8.40583645766705e-06	0.000160656239220644	4.32686268548825
ENSMUSG00000098973	Mir6236	46.3534	miRNA	0.38590471301714	6.33711751998559	11.5928250259924	7.77022709031978e-06	0.000150834412138445	4.32269668066925
ENSMUSG00000030759	Far1	1845.65787019624	protein_coding	-0.359331357727108	6.61437217158129	-11.6800612778742	7.38849349793983e-06	0.000145489410956484	4.31348316759497
ENSMUSG00000024953	Prdx5	602.542698122197	protein_coding	0.579173709661378	5.02660115776551	11.3216910068301	9.10755021101281e-06	0.000170790864321439	4.31347724635847
ENSMUSG00000065208	Gm24616	51.4603	snoRNA	-0.712505423869507	4.50317853223978	-11.3840825660681	8.77807135490032e-06	0.000165998908837885	4.31181859455146
ENSMUSG00000024597	Slc12a2	6315.53	protein_coding	-0.446187199382853	6.40503712335141	-11.5898222827551	7.78375996383843e-06	0.000150834412138445	4.30975494439996
ENSMUSG00000042446	Zmym4	3837.01619306916	protein_coding	-0.354565280763168	6.81236735843007	-11.7584582791572	7.06352982513543e-06	0.000141198004245302	4.30854001329796
ENSMUSG00000038335	Tsr1	2128.66439605589	protein_coding	-0.274644367093792	7.63557994685645	-12.1882566015745	5.54629601680335e-06	0.000117864673980851	4.29150641343086
ENSMUSG00000006715	Gmnn	377.162093725328	protein_coding	0.399225373321739	6.1707565423332	11.4847393747634	8.27464724248797e-06	0.000158574537620868	4.29036891814352
ENSMUSG00000008384	Sertad1	846.253844245304	protein_coding	1.21944733344276	3.61645359028827	11.925479802286	6.42390826947634e-06	0.000131852472397196	4.27909324443567
ENSMUSG00000028809	Srrm1	1382.30626395904	protein_coding	0.541859751909437	5.39698803254144	11.2843332750624	9.31154235002021e-06	0.000173279541104877	4.2761424385486
ENSMUSG00000030741	Spns1	726.510620960238	protein_coding	0.405967463389447	6.0936091633395	11.42600547874	8.5642875087023e-06	0.000162878655284174	4.26872575679639
ENSMUSG00000024966	Stip1	1968.53	protein_coding	-0.138939288374615	9.06624830891521	-13.3860281775908	2.94043330247874e-06	7.40774919621153e-05	4.26268739195105
ENSMUSG00000031609	Sap30	973.532	protein_coding	0.457352829226469	5.86371784523438	11.3510027678834	8.95104234545432e-06	0.000168738940676635	4.26195846560822
ENSMUSG00000021662	Arhgef28	6054.53	protein_coding	-0.850034275295752	4.42460509585748	-11.315873597666	9.13898003755231e-06	0.000171207737623697	4.25938751640574
ENSMUSG00000026179	Pnkd	513.391393356202	protein_coding	0.674311989900258	4.59798506477447	11.2566279542004	9.46617969890733e-06	0.000175585946773127	4.25597680274681
ENSMUSG00000031622	Sin3b	1462.08437592993	protein_coding	0.526227072055296	6.68471564303874	11.609676406088	7.69477466496346e-06	0.000150045609284547	4.24989038538444
ENSMUSG00000097076	Platr7	1129.53	lincRNA	-1.13392338817992	3.86354615952761	-11.6281081304163	7.61319746939485e-06	0.000149035160102831	4.24694556247609
ENSMUSG00000062353	Gm15772	235.879	processed_pseudogene	1.66777957194851	6.76908690696981	11.5652887098771	7.89533717197455e-06	0.000152383446372553	4.24593077335182
ENSMUSG00000042207	Kdm5b	3752.18624496661	protein_coding	-0.154905948723373	9.47902533426454	-13.8605071108121	2.32030902492248e-06	6.21083940035501e-05	4.24182279378511
ENSMUSG00000028826	Tmem57	2768.12744748653	protein_coding	-0.352627313798839	6.51479868840625	-11.5232886465024	8.09059415428246e-06	0.000155245379145615	4.24023588236859
ENSMUSG00000094483	Purb	8114.53	protein_coding	-0.447035066892466	6.22124562013406	-11.4110236464804	8.64000036478447e-06	0.000164007183172084	4.23763387510183
ENSMUSG00000056692	D17Wsu92e	3545.89310853992	protein_coding	-0.358686252367043	6.38864983897405	-11.4648769640544	8.37133336311264e-06	0.000160223054922402	4.23361209999473
ENSMUSG00000054942	Fam73a	2772.06914793824	protein_coding	-0.507014647192174	6.00706022681953	-11.3288800242767	9.06887938080182e-06	0.000170497879694687	4.22789110064341
ENSMUSG00000032307	Ube2q2	2179.58054919465	protein_coding	-0.495250430693983	5.45014227117872	-11.208555497652	9.74146649259687e-06	0.000180136201006796	4.22682620241403
ENSMUSG00000062901	Klhl24	6478.53	protein_coding	-0.32987068995901	7.18339660394349	-11.8096043028558	6.86028007453104e-06	0.000138259259530237	4.2244864308807
ENSMUSG00000000631	Myo18a	2332.38457144152	protein_coding	-0.408751427132745	6.04700664629403	-11.3299600481238	9.06308589030649e-06	0.000170497879694687	4.21993818477166
ENSMUSG00000001924	Uba1	2670.4001916831	protein_coding	-0.248972962054575	8.66674876479305	-12.8879113027393	3.80301532966322e-06	8.85641533525514e-05	4.21958680430609
ENSMUSG00000043384	Gprasp1	4695.69499742103	protein_coding	-0.422798601653537	6.40961672113961	-11.446470329136	8.46207981656183e-06	0.00016144573740182	4.21834072913949
ENSMUSG00000026604	Ptpn14	6229.21470780878	protein_coding	1.23934889193615	3.38898872774243	12.0995622744705	5.82630985446473e-06	0.000122173611177118	4.21790081329778
ENSMUSG00000041530	2001-08-01	6156.67319482352	protein_coding	-0.648080377169317	5.04281796957376	-11.1589752897388	1.003494958118e-05	0.000184315525650904	4.21771909045443
ENSMUSG00000004665	Cnn2	1515.2158815783	protein_coding	0.656744117280625	4.99517225356109	11.1554354189907	1.00562843240122e-05	0.000184594555682494	4.21575666526366
ENSMUSG00000017188	Coa3	511.101052788513	protein_coding	0.741840389326028	4.48189368077479	11.2034310770319	9.77134380653919e-06	0.000180577558451843	4.21246905174917
ENSMUSG00000038622	Med30	666.532	protein_coding	0.594672186919366	4.91080686600652	11.1493029693712	1.00933664858189e-05	0.000185162130361643	4.21169294625083
ENSMUSG00000008958	Vps72	970.447064932253	protein_coding	0.587402091666602	5.58025228073596	11.2022967245744	9.77797156617248e-06	0.000180588978237195	4.20893358527785
ENSMUSG00000076999	Gm22426	37.8286	miRNA	1.69401389291513	3.03179185240498	13.1152987829193	3.37785113252546e-06	8.21205895479431e-05	4.20690134536262
ENSMUSG00000040048	Ndufb10	414.129081487154	protein_coding	0.57826114081896	5.00381497933024	11.1342715555122	1.01849179582883e-05	0.000186613780322319	4.20312095225998
ENSMUSG00000028936	Rpl22	256.15737830479	protein_coding	0.163197485115695	8.98269394772259	13.1926875010905	3.24568596585241e-06	7.97462122550279e-05	4.19979901829024
ENSMUSG00000020986	Sec23a	2064.37755878576	protein_coding	-0.473247677805758	6.21658623335638	-11.3483764327462	8.96494019977054e-06	0.000168894976841947	4.19976745168705
ENSMUSG00000021598	Med10	657.532	protein_coding	0.847716499914219	4.68916935250384	11.1450770030869	1.0119010724983e-05	0.000185519312553396	4.19871846903347
ENSMUSG00000107470	CAAA01093177.1	591.532	processed_pseudogene	0.597268369591413	5.74975576475475	11.2170551420264	9.69213873758462e-06	0.000179434210972264	4.19695483436083
ENSMUSG00000063018	2010204K13Rik	350.367044590288	processed_transcript	0.92271486827624	4.12852680725828	11.294588424375	9.2550320762345e-06	0.000173058157348333	4.19142366011977
ENSMUSG00000056579	Tug1	3688.80420438493	processed_transcript	-0.388208599879023	7.25050933539165	-11.7861450546261	6.95266861098765e-06	0.000139559611951615	4.18820750551317
ENSMUSG00000028070	Apoa1bp	703.532	protein_coding	0.574279033433937	4.98561161672995	11.1037665058919	1.03736272202328e-05	0.00018883135392953	4.18508607373708
ENSMUSG00000024660	Incenp	3012.53	protein_coding	0.290555905390331	7.08957591681045	11.7042551388197	7.28642979146462e-06	0.000144046005791921	4.18487918491164
ENSMUSG00000029191	Rfc1	2894.28643123282	protein_coding	-0.236164033653234	7.47801490402673	-11.9144706689095	6.46398231671731e-06	0.000132110536727418	4.18192557401223
ENSMUSG00000004319	Clcn3	4621.07142898377	protein_coding	-0.400901968596091	6.10526562030677	-11.2860064720538	9.30229562939905e-06	0.000173279541104877	4.18134684627997
ENSMUSG00000026750	Psmb7	962.408882667399	protein_coding	0.329848755652465	7.60076641384269	11.9845122747813	6.21378167992053e-06	0.000128416730192525	4.17548902837837
ENSMUSG00000036438	Calm2	799.018136155526	protein_coding	0.18639414566556	8.58266265556288	12.7455834869289	4.10002335004586e-06	9.35471538690418e-05	4.17382479694387
ENSMUSG00000056770	Setd3	1527.94778954808	protein_coding	-0.366440067110093	6.30547324129913	-11.3247532175253	9.0910552636334e-06	0.000170735699760575	4.16397102398832
ENSMUSG00000015002	Efr3a	3101.97360197616	protein_coding	-0.307370937719861	6.92965843187875	-11.5832976923376	7.8132576053458e-06	0.000151178736499057	4.16272141285896
ENSMUSG00000029221	Slc30a9	1037.93922302263	protein_coding	-0.445785820318227	6.14816150817491	-11.2681979270957	9.40124999340451e-06	0.000174705108875579	4.16246283549295
ENSMUSG00000029522	Pla2g1b	206.176234712177	protein_coding	0.508632821497236	5.5522102808125	11.1227342923919	1.02558273704549e-05	0.000187569906667558	4.16215958468719
ENSMUSG00000069011	Gm10254	662.532	processed_pseudogene	0.873721096898809	5.45348464004747	11.0997298642574	1.03988946447329e-05	0.00018883135392953	4.16148325888058
ENSMUSG00000045394	Epcam	1835.53	protein_coding	-0.308356982445979	6.85004737944349	-11.5364576820094	8.02878759230751e-06	0.000154264478761346	4.15693735542571
ENSMUSG00000055024	Ep300	3812.3013050824	protein_coding	0.537462627632538	5.29912478684941	11.0767842875312	1.05438569982065e-05	0.000190616046557054	4.15689645262036
ENSMUSG00000051154	Commd3	387.977628562857	protein_coding	1.16067044612009	3.50480263090494	11.7587049836091	7.06253316494315e-06	0.000141198004245302	4.15438166291299
ENSMUSG00000037152	Ndufc1	145.995198230181	protein_coding	0.664665732860661	5.22938682849706	11.0643260914479	1.06235237141746e-05	0.000191612403413706	4.15417186357252
ENSMUSG00000003072	Atp5d	692.501475387044	protein_coding	0.530178631499187	6.23720140212887	11.284519529706	9.31051252025834e-06	0.000173279541104877	4.15237528135991
ENSMUSG00000020092	Pald1	4069.53	protein_coding	-0.328623975497498	7.08602646747671	-11.6422762408623	7.55115812831357e-06	0.000148110150520688	4.15126540888001
ENSMUSG00000053477	Tcf4	2757.88747760633	protein_coding	-0.603318119613722	4.92656149796148	-11.0408206591872	1.07757023980158e-05	0.000193567883846327	4.14746312924862
ENSMUSG00000027006	Dnajc10	2954.12051164916	protein_coding	-0.419624434191981	6.28824848919444	-11.2900520229077	9.27998142922317e-06	0.000173093831140116	4.14658107358193
ENSMUSG00000035834	Polr3g	1192.55509930053	protein_coding	-0.454044507121665	5.75175127282705	-11.1320232054615	1.01986928144564e-05	0.000186752297612187	4.14427382107217
ENSMUSG00000017774	Myo1c	3670.92701992564	protein_coding	-0.487601340151224	5.54712547189625	-11.0887793414036	1.04677921936514e-05	0.000189714528122455	4.14335261372836
ENSMUSG00000021645	Smn1	477.181466054217	protein_coding	1.05233404434802	4.36244726449339	11.1145355810952	1.03065583082461e-05	0.000188383072143848	4.13971715509866
ENSMUSG00000099875	Gm15453	261.717	processed_pseudogene	0.807441258668276	4.35888941830181	11.1035322552609	1.03750916095765e-05	0.00018883135392953	4.1385752982103
ENSMUSG00000063524	Eno1	642.621745573477	protein_coding	-0.226635118117597	8.4123080636205	-12.5174976565019	4.63269328465745e-06	0.000103040562924257	4.13445949526811
ENSMUSG00000059534	Uqcr10	237.975125343009	protein_coding	0.841413551550643	5.99766683246807	11.1741633200014	9.9439928830395e-06	0.000183268379447137	4.13435971838718
ENSMUSG00000059439	Bcas3	1428.19116835758	protein_coding	0.473040907573409	5.68435898163382	11.1039252615834	1.03726349117159e-05	0.00018883135392953	4.13393827232957
ENSMUSG00000026923	Notch1	4270.46634461874	protein_coding	0.583734305576755	5.2381599395274	11.0271878615993	1.08650968025788e-05	0.000195033030956207	4.13060942342874
ENSMUSG00000020721	Helz	6827.02380340549	protein_coding	0.459774056849907	5.64801747335938	11.0908895260419	1.04544753096177e-05	0.000189587524791009	4.13043699014608
ENSMUSG00000030168	Adipor2	3420.46646776583	protein_coding	-0.302015939832751	7.40271006282329	-11.7776195878651	6.98659361614723e-06	0.000140053146696935	4.12589066912295
ENSMUSG00000033184	Tmed7	2706.58117894242	protein_coding	-0.421161242049234	6.51444403922481	-11.3281648194168	9.0727182146429e-06	0.000170497879694687	4.11804724253014
ENSMUSG00000008683	Rps15a	127.725616895218	protein_coding	0.243261680961529	8.76765564250972	12.8241888610756	3.9328568410569e-06	9.08282793160018e-05	4.11566415215675
ENSMUSG00000083380	Gm3244	192.216	processed_pseudogene	0.437371702621512	5.84234331629687	11.1099485039525	1.03350658825332e-05	0.000188674601885929	4.11418870225193
ENSMUSG00000067038	Rps12-ps3	290.058	protein_coding	0.822067660868557	6.27178074074491	11.2206371696057	9.67143539647922e-06	0.000179171986577561	4.10992669782841
ENSMUSG00000048279	Sacs	12783.3479571748	protein_coding	-0.515830232782825	6.07267724328194	-11.1602255801534	1.00274263846091e-05	0.00018428999108937	4.10968180585383
ENSMUSG00000028821	Syf2	1127.9861435184	protein_coding	0.564619133109852	5.65351103404006	11.0539347161955	1.06904965893671e-05	0.000192320072200127	4.10744609003126
ENSMUSG00000027803	Wwtr1	4492.53	protein_coding	-0.668707662988701	4.79138911992238	-10.976971441677	1.1201719325016e-05	0.000200000275696617	4.10629508945017
ENSMUSG00000082097	Gm14039	39.4152	processed_pseudogene	1.74862333003618	2.84220109287401	13.4617495149652	2.82988552019418e-06	7.21861035622367e-05	4.1036324232125
ENSMUSG00000028741	Mrto4	723.002976671545	protein_coding	0.314795956409657	6.78385932740028	11.4186907388452	8.6011590690496e-06	0.000163373090307125	4.09790704877492
ENSMUSG00000018882	Mrpl45	1448.6618154722	protein_coding	0.319557446230837	6.76099251690463	11.3990004706909	8.70131121711582e-06	0.000164858575512682	4.09195127916052
ENSMUSG00000039737	Prkrip1	491.51829818175	protein_coding	0.738722224078788	4.55494363486789	10.9608427163009	1.13123370719833e-05	0.000201377024097172	4.08291767147581
ENSMUSG00000078622	Ccdc47	1662.08902424177	protein_coding	-0.456199500365136	5.89260263348854	-11.0644305121646	1.06228531392913e-05	0.000191612403413706	4.07987762483537
ENSMUSG00000031093	Dock11	6397.92795891513	protein_coding	-0.504039526910159	5.48067805054077	-10.9642921461368	1.12885755583456e-05	0.000201073151720644	4.07283368935247
ENSMUSG00000022119	Rbm26	3480.20595614192	protein_coding	-0.37245382764059	6.37522449984371	-11.1947497646632	9.82219686802189e-06	0.000181294345016701	4.06509282078943
ENSMUSG00000031523	Dlc1	5867.21123827642	protein_coding	-0.354150666742148	6.57988037666972	-11.2707210794835	9.38715752664852e-06	0.000174551173588033	4.06288900129337
ENSMUSG00000033389	Arhgap44	3801.68753535798	protein_coding	-1.07728798820634	4.16273334023862	-11.0406167743676	1.07770331683219e-05	0.000193567883846327	4.05049699514373
ENSMUSG00000030088	Aldh1l1	2097.84230360969	protein_coding	-0.853720820248983	4.26135572345865	-10.9826328510544	1.11631824466617e-05	0.000199430718989142	4.04843151643397
ENSMUSG00000082925	Gm13135	2916.53	processed_pseudogene	-1.02814540740209	4.74003818244914	-10.8795347415071	1.1889209760837e-05	0.000209413167704216	4.04357563788169
ENSMUSG00000021555	Naa35	728.129083765856	protein_coding	-0.403710499246194	5.96017009993647	-11.0243020500502	1.08841277259332e-05	0.000195141500021817	4.0417561161619
ENSMUSG00000025144	Stra13	425.414938518159	protein_coding	0.812868291978876	4.21569426431989	10.9664604705086	1.12736679812824e-05	0.000200926719554896	4.03787005028419
ENSMUSG00000045103	Dmd	2213.14741964801	protein_coding	-0.454940752596024	6.27887020473731	-11.1135065086399	1.03129459697577e-05	0.00018838523613693	4.03635446620761
ENSMUSG00000033940	Brk1	890.532	protein_coding	0.75200752360632	6.13443110281971	11.0627381107749	1.06337274225287e-05	0.000191681388913956	4.03567484661594
ENSMUSG00000051378	Kif18b	2939.03004619644	protein_coding	0.547821391189061	5.60658680433461	10.9291357715087	1.15334308023026e-05	0.000204464933438578	4.03447753784651
ENSMUSG00000030603	Psmc4	861.960015570882	protein_coding	0.206502220120335	7.72126254783343	11.8364204769902	6.75637490656354e-06	0.000136439724171591	4.03115654468897
ENSMUSG00000024271	Elp2	2584.53	protein_coding	-0.25674546913625	7.29160861931527	-11.5651868084484	7.89580438623795e-06	0.000152383446372553	4.02973123463979
ENSMUSG00000044626	Liph	3588.53	protein_coding	-0.435599698023524	5.89153097148064	-10.9737733538401	1.12235552485242e-05	0.000200271147068232	4.02171536887091
ENSMUSG00000000901	Mmp11	1775.79207476377	protein_coding	-0.596438665229502	5.34941451475841	-10.8587795379296	1.20417668402398e-05	0.000211175858178599	4.01976688393919
ENSMUSG00000027133	Nop10	904.532	protein_coding	0.582529809616996	5.75008892743336	10.9329118147081	1.15068447389953e-05	0.000204114036341245	4.01734999867843
ENSMUSG00000069793	Slfn9	4094.24920449254	protein_coding	-1.11392090264573	3.53129388787519	-11.4551847556268	8.41897835830281e-06	0.000160725464224041	4.01609142103665
ENSMUSG00000020738	Sumo2	691.485577244506	protein_coding	0.220192572341212	7.60808712486658	11.7277621210181	7.18879503180828e-06	0.000143057021132985	4.008856512402
ENSMUSG00000003824	Syce2	595.096730726972	protein_coding	0.570833546027044	4.99332891628756	10.8099075406009	1.24098452556374e-05	0.000215302217140097	4.00731381306567
ENSMUSG00000072582	Ptrh2	2890.67363735173	protein_coding	0.646172536705969	4.82195417083247	10.8063125746843	1.2437420888477e-05	0.000215656122491543	4.00585811379003
ENSMUSG00000006418	Rnf114	2110.89222572131	protein_coding	0.405658988568337	6.36825049930583	11.1027568183594	1.03799408334948e-05	0.00018883135392953	4.00458136159154
ENSMUSG00000032366	Tpm1	1111.72447639174	protein_coding	0.44776364293949	5.65682746320317	10.8913347153607	1.18034549580675e-05	0.000208146724198926	4.00285650654721
ENSMUSG00000057193	Slc44a2	3251.53	protein_coding	-0.789815692581058	4.93351561468398	-10.8001488120668	1.24848627680399e-05	0.000216104632094949	4.00261409399899
ENSMUSG00000054662	Ano9	2807.53	protein_coding	-0.502200109282168	5.99399058190376	-10.9690526309827	1.1255875777648e-05	0.000200728671360562	4.00162459947491
ENSMUSG00000043424	Eif3j2	2174.53	protein_coding	-0.35417623713182	6.5826814053385	-11.1735842752278	9.94744340504777e-06	0.000183268379447137	3.99933085887622
ENSMUSG00000026950	Neb	12889.5232290099	protein_coding	-1.55950477973331	3.40593123379237	-11.7228271124016	7.20916840921728e-06	0.000143177991757151	3.99784832756034
ENSMUSG00000015013	Trappc2l	402.542	protein_coding	0.780566167413668	4.28963438278033	10.8637690500814	1.20048905755574e-05	0.000211026944888312	3.99409703602987
ENSMUSG00000050310	Rictor	9106.53	protein_coding	-0.378818297653877	6.32908538142204	-11.0566568890255	1.06729058508002e-05	0.000192157068850027	3.9866279646581
ENSMUSG00000023007	Prpf40b	1226.10788069772	protein_coding	-0.49748427688733	5.79833744089035	-10.8935954707763	1.17871054562172e-05	0.000207983226425263	3.98638836318487
ENSMUSG00000031939	Taf1d	1007.11474003209	protein_coding	0.338215311396832	6.87204503077304	11.2840689515597	9.31300405618745e-06	0.000173279541104877	3.98502556028276
ENSMUSG00000031483	Erlin2	3738.53	protein_coding	-0.491324422025982	5.58903013236208	-10.844336676005	1.21492372100098e-05	0.00021223369641723	3.98432300698683
ENSMUSG00000025724	Sec11a	476.915952348321	protein_coding	0.73846842704919	4.95099660182903	10.7526951129126	1.2857064105816e-05	0.000221019404642829	3.97323196223784
ENSMUSG00000032458	Copb2	2746.52599156299	protein_coding	-0.260182562966795	7.48773982706215	-11.5894537073531	7.78542291679351e-06	0.000150834412138445	3.97228346383276
ENSMUSG00000033813	Tcea1	2349.77544924787	protein_coding	-0.323990743398348	7.82122967243639	-11.7969034285075	6.91012504255484e-06	0.000138798360563991	3.97092578484309
ENSMUSG00000030720	Cln3	665.000214779276	protein_coding	0.87653448672585	4.02653472382152	10.9216275109083	1.1586501757208e-05	0.000204861173999451	3.97063788053618
ENSMUSG00000025232	Hexa	1660.53	protein_coding	0.306476258977397	7.0610356006655	11.3538719667859	8.93588727630159e-06	0.000168558993575384	3.96994895942107
ENSMUSG00000093843	Gm25939	69.5506	snRNA	0.786754303958846	4.77766287159278	10.7486684557713	1.28892222758653e-05	0.000221318994381415	3.96987863566988
ENSMUSG00000024974	Smc3	4140.96298691744	protein_coding	-0.264831170474808	8.01130701248809	-11.9265052057357	6.42019011768889e-06	0.000131852472397196	3.9662022878664
ENSMUSG00000032890	Rims3	4790.71297975802	protein_coding	-0.489077985905317	5.51684397626749	-10.8009470795824	1.24787070203807e-05	0.000216104632094949	3.96537341011102
ENSMUSG00000046591	Ticrr	4534.87971151261	protein_coding	0.355457098182369	6.4202520974085	11.057913507678	1.06647966403258e-05	0.000192126183600211	3.96231094812048
ENSMUSG00000108653	AC155806.1	857.532	protein_coding	0.31563118053176	6.98108884232786	11.3017140278268	9.21599621326237e-06	0.00017243553562411	3.96216476143468
ENSMUSG00000079677	Fdx1l	577.532	protein_coding	0.852778627447515	4.72630080011476	10.731994576498	1.3023360221997e-05	0.000223239561500735	3.95793737771444
ENSMUSG00000039100	March6	6031.53	protein_coding	-0.579757646159059	5.73659173382694	-10.8297609266785	1.22588013249172e-05	0.000213297464396315	3.95589519449738
ENSMUSG00000024892	Pcx	3943.52767134339	protein_coding	-0.57880067125266	4.97284072767338	-10.7234027420214	1.30930977192523e-05	0.000223924014437002	3.95493413144418
ENSMUSG00000061665	Cd2ap	5194.53	protein_coding	-0.33293781273787	6.64704978453308	-11.1253207238633	1.02398822433163e-05	0.000187392339542881	3.95009961071536
ENSMUSG00000020737	Hn1	862.421016913578	protein_coding	0.416558891660896	6.57936914618652	11.0995201360565	1.0400209349841e-05	0.00018883135392953	3.94943248383248
ENSMUSG00000039278	Pcsk1n	1988.53	protein_coding	1.86102351745173	2.82085776458846	13.0672609762702	3.4629661730759e-06	8.33135872976444e-05	3.94481836631571
ENSMUSG00000037315	Jade3	3522.27137490699	protein_coding	-0.57670704920324	5.3641027809621	-10.7408714633598	1.29517513608631e-05	0.000222138799453524	3.94385274608901
ENSMUSG00000038046	Rnmtl1	1077.11363411896	protein_coding	1.08436508216425	3.39028027168926	11.4002803429101	8.69476120960508e-06	0.000164838409834336	3.94215941667436
ENSMUSG00000050335	Lgals3	785.677077418481	protein_coding	-0.576294717995955	5.1226161733998	-10.7071519041799	1.32261630167551e-05	0.000225383483839165	3.939715598982
ENSMUSG00000024014	Pim1	2433.53	protein_coding	-0.328942595109718	6.63365180050585	-11.1024625401988	1.03817817865072e-05	0.00018883135392953	3.93867575446556
ENSMUSG00000039456	Morc3	3184.92595651913	protein_coding	-0.276105169445348	7.29550865341877	-11.4236982061747	8.5758984111915e-06	0.000162996313319351	3.93742461694149
ENSMUSG00000022255	Mtdh	1512.08580904469	protein_coding	-0.266499948312988	7.75235073080556	-11.6995406679822	7.30619188275739e-06	0.000144297823980692	3.93610462533104
ENSMUSG00000047459	Dynlrb1	479.881638549292	protein_coding	0.551372980620577	5.07594640992103	10.6973122537015	1.33074777289803e-05	0.000226325054102227	3.93468594389933
ENSMUSG00000018849	Wwc1	2930.91483647005	protein_coding	-0.683511221088087	5.2502960031835	-10.7065721643892	1.32309383171582e-05	0.000225383483839165	3.9324978889471
ENSMUSG00000001833	Sept7	2328.53	protein_coding	-0.339461099089816	6.81471501411049	-11.1698059837663	9.96999160566044e-06	0.000183571248626526	3.93132607135689
ENSMUSG00000030086	Chchd6	926.415014489346	protein_coding	1.09774180218047	3.65884626202715	11.1002667476462	1.03955299896148e-05	0.00018883135392953	3.93039859240269
ENSMUSG00000040722	Scamp5	2985.53	protein_coding	-0.459154842165724	5.68721588154448	-10.7773076837421	1.26624679557681e-05	0.000218298622835843	3.92752787943881
ENSMUSG00000028572	Hook1	1633.74728953428	protein_coding	-0.499836408417247	6.94425869658092	-11.2161233303185	9.69753265063583e-06	0.000179434210972264	3.92679934627235
ENSMUSG00000006457	Actn3	2661.90617536509	protein_coding	-0.674635179559122	4.81852597176264	-10.6767333703079	1.34793817366347e-05	0.000228192643269936	3.92670182138518
ENSMUSG00000020280	Pus10	1325.36556570662	protein_coding	-0.452717962273597	5.73970137966538	-10.7877079093802	1.2581246075838e-05	0.000217231567254763	3.92639053053876
ENSMUSG00000038697	Taf5l	2695.53001899576	protein_coding	-0.325592263827063	6.97129781288324	-11.2360480419172	9.58293471323776e-06	0.000177641952620655	3.92624037726716
ENSMUSG00000052298	Cdc42se2	1968.07161025986	protein_coding	-0.429498260848176	6.035680576407	-10.866348959264	1.19858733735488e-05	0.000210868564989326	3.925847313589
ENSMUSG00000027624	Epb41l1	1905.29892901667	protein_coding	-0.674486253424456	4.95585283611339	-10.6708262247576	1.35291910128681e-05	0.00022877808708254	3.92292755740988
ENSMUSG00000031314	Taf1	4220.318889169	protein_coding	-0.386842374595767	7.09784392450323	-11.2915329185679	9.27182839633354e-06	0.000173093831140116	3.9228382231949
ENSMUSG00000020766	Galk1	1201.53	protein_coding	0.509966147710026	5.73310724684903	10.7834228805744	1.26146387269367e-05	0.000217598897305235	3.92269274673341
ENSMUSG00000029478	Ncor2	4989.37502809287	protein_coding	0.984583824720548	4.01963193534486	10.8404993729379	1.21779735885973e-05	0.000212383011238398	3.92059783882757
ENSMUSG00000022791	Tnk2	1514.51807974937	protein_coding	-0.413817172100448	6.1190094258707	-10.8837891873684	1.18582098702665e-05	0.000208989647150521	3.92035843601688
ENSMUSG00000021737	Psmd6	1153.76425593934	protein_coding	0.355062578516236	6.88393284422283	11.187988642483	9.86201008145321e-06	0.000181917459139096	3.91892616999195
ENSMUSG00000063412	Gm10131	389.549	processed_pseudogene	0.443270741754981	6.46641402570482	11.005607235405	1.10083339706555e-05	0.000197015740014429	3.91754251312229
ENSMUSG00000060152	Pop5	306.886594549565	protein_coding	0.575871157879371	5.13447223616963	10.6714427135314	1.35239830081484e-05	0.00022877808708254	3.91555247174533
ENSMUSG00000021895	Arhgef3	3380.53	protein_coding	-0.940870828885486	4.78848667797574	-10.6572486430322	1.36444713355855e-05	0.000230199970899484	3.91326067436813
ENSMUSG00000032434	Cmtm6	3147.53	protein_coding	-0.453341323270385	6.14184100862376	-10.8775281653166	1.19038625282091e-05	0.000209548427129557	3.91226264260026
ENSMUSG00000063362	Alg11	2166.11884657152	protein_coding	-0.49075051696119	5.56582119105258	-10.7187937299124	1.31306823316051e-05	0.000224439063357453	3.90664079832164
ENSMUSG00000019432	Ddx39b	1402.88432308751	protein_coding	-0.205539001766555	7.84797209552037	-11.7201641419254	7.22018928739887e-06	0.000143218869106585	3.90630610895291
ENSMUSG00000036534	Slc38a7	2378.78143687258	protein_coding	-0.623333105524889	4.86623722753796	-10.6417928075486	1.37770575928358e-05	0.000231665810636331	3.9056338037606
ENSMUSG00000030298	Sec13	1080.24948839979	protein_coding	0.368157916416723	6.70133701356049	11.0817383996333	1.05123654516401e-05	0.000190407516248543	3.90341417923546
ENSMUSG00000040549	Ckap5	4068.38811631581	protein_coding	-0.250866196038373	8.07078789142193	-11.8648994842418	6.64797944309091e-06	0.000134976442084756	3.89896327909678
ENSMUSG00000048087	Gm4737	1876.53	protein_coding	-0.241159292751449	8.05040554430265	-11.8438405183317	6.72794092472902e-06	0.000136048382804295	3.89476603907264
ENSMUSG00000039115	Itga9	2398.10585922512	protein_coding	-0.530368573821852	5.14048757437877	-10.6346981558854	1.38384073555598e-05	0.000232567283348556	3.89291101079565
ENSMUSG00000001440	Kpnb1	4076.13807517983	protein_coding	-0.0894275644468134	9.39173447806683	-13.1396452454104	3.33562325196327e-06	8.12912758298819e-05	3.89233692985425
ENSMUSG00000069083	Gm10259	1385.53	processed_pseudogene	-0.681657257995227	6.97213557913349	-11.1641345488528	1.00039467680571e-05	0.000183970989249295	3.89021071228688
ENSMUSG00000029111	Nelfa	2368.44166577348	protein_coding	0.561913459504706	5.77561357122418	10.7419466417815	1.29431083897004e-05	0.000222117340949234	3.88966571043854
ENSMUSG00000064880	Gm24201	46.9864	snoRNA	1.0702079861223	3.55720403236467	11.101467235461	1.0388010987184e-05	0.00018883135392953	3.88889124285321
ENSMUSG00000021096	Ppm1a	2584.53	protein_coding	-0.272850209171893	7.28042749732103	-11.3404222345122	9.00718137063533e-06	0.000169584456770815	3.88852509887777
ENSMUSG00000007739	Cct4	1082.4569694928	protein_coding	-0.122734764145058	9.048939473365	-12.731030957033	4.13185002336793e-06	9.41303725187134e-05	3.8883369610778
ENSMUSG00000027422	Rrbp1	3490.74163801967	protein_coding	-0.334378033388878	6.6164308788246	-11.0171063773076	1.09317457003305e-05	0.000195761636799303	3.88739608642908
ENSMUSG00000035158	Mitf	2468.31448829174	protein_coding	-0.85703876255445	4.38747491812599	-10.6564155760748	1.36515806896363e-05	0.000230199970899484	3.88323801722938
ENSMUSG00000028614	Ndc1	1944.18408731824	protein_coding	-0.354825956249849	6.48742003906592	-10.9535631676365	1.13626690377326e-05	0.000202153251577754	3.87998256722594
ENSMUSG00000018666	Cbx1	1721.48309006506	protein_coding	-0.302816174087258	7.4434419247411	-11.4096994185614	8.64672902160053e-06	0.000164031288112421	3.8741228456638
ENSMUSG00000059518	Znhit1	522.713570097818	protein_coding	0.825981721152481	4.20853466414685	10.6768030768534	1.34787952117824e-05	0.000228192643269936	3.87411856921603
ENSMUSG00000021699	Pde4d	2252.39558329873	protein_coding	-0.861481898711102	3.96394010936521	-10.769150930304	1.27265855968278e-05	0.000219278194150849	3.86404380219237
ENSMUSG00000031099	Smarca1	2447.30895721383	protein_coding	-0.9113321932456	3.80783935263192	-10.858274532551	1.20455063701993e-05	0.000211175858178599	3.86168057826803
ENSMUSG00000022706	Mrpl40	692.736530020701	protein_coding	0.489609076573593	5.59027722245185	10.6574314564588	1.36429117765471e-05	0.000230199970899484	3.86141403151868
ENSMUSG00000015656	Hspa8	476.61255324089	protein_coding	0.109565717966044	10.7510874816903	15.6695796237459	1.00359865625006e-06	3.35079289129535e-05	3.85429673349029
ENSMUSG00000023971	Rrp36	990.532	protein_coding	0.484298745266934	5.40308313592638	10.5960673497938	1.41779482350972e-05	0.000236948368474103	3.84445733698344
ENSMUSG00000025665	Rps6ka6	2401.17970998335	protein_coding	-0.357939296463335	6.39278731826585	-10.8598337697491	1.20339645716034e-05	0.000211175858178599	3.84168885388155
ENSMUSG00000028228	Cpne3	5341.77927983319	protein_coding	-0.386587774386256	6.1925571435064	-10.7882956473011	1.25766737409753e-05	0.000217231567254763	3.84123936990724
ENSMUSG00000026709	Dars2	1229.47083855283	protein_coding	-0.421208892020161	6.24146839865242	-10.8033677294186	1.24600615061314e-05	0.000215924099306656	3.84102755689362
ENSMUSG00000027405	Nop56	509.553503762429	protein_coding	-0.177348992727605	8.70779877138801	-12.2985068826846	5.21930396297394e-06	0.000112265472285901	3.83555085238064
ENSMUSG00000032330	Cox7a2	549.532	protein_coding	0.517345421558791	6.21941667682542	10.7870823608553	1.25861146324517e-05	0.000217231567254763	3.8331897205384
ENSMUSG00000017723	Wfdc2	307.555731779936	protein_coding	0.927662356300524	4.09162405866511	10.6476370995919	1.37267518309354e-05	0.000230949140967401	3.83282038996415
ENSMUSG00000040234	Tm7sf3	1876.74718886315	protein_coding	-0.345120475389685	6.39684391011782	-10.845881170174	1.21376926955854e-05	0.00021223369641723	3.83122141792156
ENSMUSG00000015671	Psma2	739.532	protein_coding	0.347038182883451	7.29778699551361	11.2655214365641	9.41622515473057e-06	0.000174875247017614	3.83036164854469
ENSMUSG00000001228	Uhrf1	1705.08934126375	protein_coding	-0.13832893192073	8.50312533077648	-12.107933959274	5.7992044162778e-06	0.000121701219773677	3.83007970511695
ENSMUSG00000002014	Ssr4	558.115725745913	protein_coding	0.455346397239177	5.51640953718572	10.5935572971657	1.42003349863462e-05	0.000237190586995396	3.82921235316993
ENSMUSG00000029769	Ccdc136	1031.38081435293	protein_coding	-0.713990168745174	4.81642133305238	-10.5130624732446	1.49399720193048e-05	0.000247345024357074	3.82579355979534
ENSMUSG00000005973	Rcn1	2515.53	protein_coding	-0.526297949791047	5.49423282551238	-10.5786181308976	1.43344075189357e-05	0.000238899909276625	3.82508195518117
ENSMUSG00000027423	Snx5	951.963460098185	protein_coding	-0.173585051778032	8.62402348704104	-12.2008056282198	5.50792662297685e-06	0.000117381338364419	3.8225878640243
ENSMUSG00000050199	Lgr4	4181.32790949829	protein_coding	-0.426869609045593	6.68461612401974	-10.9436704347162	1.14314769079758e-05	0.000203257070773826	3.82170705567849
ENSMUSG00000020464	Pnpt1	1271.18430673984	protein_coding	-0.384581755336316	6.06586825134644	-10.7165559506068	1.31489746453493e-05	0.000224623956292269	3.82047074112265
ENSMUSG00000000532	Acvr1b	4208.53	protein_coding	-0.475338135174923	5.66688736875329	-10.6064071535144	1.40861504252617e-05	0.000235807651325174	3.81927828149755
ENSMUSG00000038539	Atf5	1550.84798467095	protein_coding	-0.348380691908584	6.44363222697121	-10.8437940016971	1.21532964547755e-05	0.00021223369641723	3.81816019057607
ENSMUSG00000064030	Pym1	968.242677614052	protein_coding	0.383405625807128	6.65999483775821	10.9339349645817	1.14996530084825e-05	0.000204106954076722	3.81741765981672
ENSMUSG00000050936	Hist2h2bb	1306.53	lincRNA	1.85290647458873	2.74290739305126	12.8884660661725	3.80190654192528e-06	8.85641533525514e-05	3.81605631118498
ENSMUSG00000079259	Trim71	9127.53	protein_coding	-0.143243918441215	9.09255609984478	-12.6555043870935	4.30160739997279e-06	9.69684926945104e-05	3.81506214193123
ENSMUSG00000044150	A830080D01Rik	1838.33817084736	protein_coding	-0.406676950782966	6.02455150294732	-10.6953367317572	1.3323871699785e-05	0.000226325054102227	3.81505582363236
ENSMUSG00000044224	Dnajc21	1848.73934141281	protein_coding	-0.411007198619487	6.70157572716313	-10.9357400999774	1.14869771303635e-05	0.000204002467961166	3.8114593279041
ENSMUSG00000040430	Pitpnc1	2970.20482103822	protein_coding	-0.562732200733808	5.03341481971532	-10.4964129557661	1.50983569010804e-05	0.000249829585088417	3.81082488117557
ENSMUSG00000050332	Amer1	8291.53	protein_coding	-0.609666042632111	4.70275591206168	-10.4769294286923	1.52861252645775e-05	0.000252242052759631	3.80182184787951
ENSMUSG00000020780	Srp68	2309.01498657337	protein_coding	0.409603377013566	6.17880366078266	10.7254743023749	1.30762447634941e-05	0.000223924014437002	3.79990915825292
ENSMUSG00000020794	Ube2g1	2732.14112664159	protein_coding	-0.507302578646538	5.49063626056356	-10.538168223747	1.47046947089327e-05	0.000244122304590453	3.79878437415649
ENSMUSG00000056209	Npm3	662.59584910621	protein_coding	0.398885463468146	5.94373106470163	10.6512659106026	1.36956210928969e-05	0.000230554463989052	3.79869056921171
ENSMUSG00000040658	Dnph1	901.532	protein_coding	0.575418701076234	5.15819998805211	10.4818053498577	1.52388873187658e-05	0.000251739046202085	3.79323878881508
ENSMUSG00000024782	Ak3	1389.55079988031	protein_coding	-0.651294245522377	4.53460235394337	-10.4734677358756	1.53197629846006e-05	0.00025254710930644	3.79176278314343
ENSMUSG00000024889	Rce1	1241.53	protein_coding	0.513789223881506	5.14951711348819	10.4785618281174	1.52702921008875e-05	0.00025211923480196	3.7914561690593
ENSMUSG00000029518	Rab35	1705.83116260526	protein_coding	-0.386846483580595	6.01905004796721	-10.6539670804471	1.36725003769962e-05	0.000230294262235628	3.78830898467791
ENSMUSG00000014846	Tppp3	793.110321791606	protein_coding	0.991772174205644	3.59326814564459	10.8522180081884	1.20904573491418e-05	0.000211716872310234	3.7880504310841
ENSMUSG00000067288	Rps28	165.859575952878	protein_coding	0.534080944988033	7.46841802087294	11.2904434762152	9.277825501943e-06	0.000173093831140116	3.78646961593971
ENSMUSG00000019471	Cdc37	2251.53	protein_coding	0.288530220534979	7.07505344480916	11.0801743952213	1.05222957298251e-05	0.000190472568906936	3.7851408000291
ENSMUSG00000079553	Kifc1	1265.79035385921	protein_coding	0.461711620835477	6.22535604372899	10.7152690902027	1.31595069421155e-05	0.00022467289412281	3.78327846446164
ENSMUSG00000029311	Hsd17b11	1636.02147023061	protein_coding	-1.12576469701165	3.54758367925842	-10.9371888645098	1.14768152018211e-05	0.000203942531046435	3.78145284050042
ENSMUSG00000032834	Pwp2	3666.53	protein_coding	-0.339935684900156	6.52480245272442	-10.8197880679796	1.23344121416567e-05	0.000214304224517177	3.78099368401304
ENSMUSG00000030983	Bccip	389.899798575859	protein_coding	0.318347012271649	6.61746753182359	10.861426683105	1.20221864534236e-05	0.000211136575534147	3.78022699036503
ENSMUSG00000045886	Gm9803	311.8	protein_coding	0.711017254278076	4.30871324876752	10.4860012552409	1.51983698940539e-05	0.000251207820102544	3.77992201458044
ENSMUSG00000030612	Mrpl46	921.996214486399	protein_coding	0.642691306776928	4.59149643286681	10.4453511747275	1.55961074024231e-05	0.000255522607719992	3.7791112960367
ENSMUSG00000091028	Gm10722	446.533	protein_coding	3.27674853181309	2.55912659740826	18.1352985806275	3.67370447897876e-07	1.58607968231081e-05	3.77790248150586
ENSMUSG00000082691	Dynlt1-ps1	153.115	processed_pseudogene	0.354385719421906	6.55356668519475	10.8301975489701	1.22555030416455e-05	0.000213297464396315	3.77726988569567
ENSMUSG00000071014	Ndufb6	423.895879667278	protein_coding	0.809155304336546	5.31294649902798	10.4722939024515	1.53311883336538e-05	0.00025254710930644	3.77629411486951
ENSMUSG00000037499	Nenf	537.532	protein_coding	1.14507140027008	3.17880031236789	11.3071499870719	9.18634233655685e-06	0.000171987788704796	3.76988662585203
ENSMUSG00000020484	Xbp1	1497.17573083659	protein_coding	-0.384797969779314	6.65982895608765	-10.8558061626788	1.20638034528864e-05	0.00021137331192757	3.76904233259097
ENSMUSG00000037020	Wdr62	2476.54740974296	protein_coding	0.617041981956026	4.95740248590175	10.426803689802	1.57814965104243e-05	0.000257727276435727	3.76890838088071
ENSMUSG00000041431	Ccnb1	1154.60263036145	protein_coding	-0.155071882017086	8.30965956967359	-11.8473877095135	6.71439594950922e-06	0.000136048382804295	3.76748755334339
ENSMUSG00000022890	Atp5j	285.814865960419	protein_coding	0.406299139934895	6.43463853291856	10.7671324277011	1.27425092149717e-05	0.000219426738911567	3.76685265943513
ENSMUSG00000061474	Mrps36	347.694193200683	protein_coding	0.820178322390479	4.36120949098689	10.4511326342516	1.55388254730538e-05	0.000255010449722255	3.76376192473629
ENSMUSG00000074886	Grk6	2607.68407176468	protein_coding	-0.472440250367616	6.23699781031883	-10.6791617628378	1.34589658116566e-05	0.000228192643269936	3.76012621489548
ENSMUSG00000038578	Susd1	2167.13206103286	protein_coding	-1.34324038253511	2.9683648951227	-11.8340810500172	6.7653679988216e-06	0.000136529578909732	3.76007289860553
ENSMUSG00000009927	Rps25	478.532	protein_coding	0.278506873223559	8.77525443179153	12.2457672287107	5.3729093612113e-06	0.000115321823853599	3.75954121765328
ENSMUSG00000073481	Marc2	521.819726145086	protein_coding	0.649552122869644	5.28659929024696	10.440792198315	1.56414460625516e-05	0.0002559966300292	3.7566720392905
ENSMUSG00000028062	Lamtor2	414.714493742081	protein_coding	0.505224210266615	5.27310314769184	10.4303674252855	1.57456824833862e-05	0.000257534002679015	3.75005156104341
ENSMUSG00000042508	Dmtf1	1285.11577341212	protein_coding	-0.361362595029516	6.48323718011213	-10.7563229219046	1.28281692084356e-05	0.00022069913730161	3.7496663951508
ENSMUSG00000017843	Ppp2r5c	3925.77520496529	protein_coding	-0.355225729403472	7.08984675471206	-11.0247612829064	1.0881096715087e-05	0.000195141500021817	3.74844569565808
ENSMUSG00000026594	Ralgps2	1275.53081520944	protein_coding	-0.509167113298353	5.88429547867183	-10.5511346710995	1.45848281160337e-05	0.000242400165961669	3.74744004187426
ENSMUSG00000004591	Pkn2	2802.44391500755	protein_coding	-0.290823760764169	7.23565451602815	-11.0946030671908	1.04310866898351e-05	0.000189277611076604	3.74270754678241
ENSMUSG00000036086	Zranb3	2632.7683239203	protein_coding	-0.401250405305141	5.8643427910242	-10.5310141625429	1.47713076513266e-05	0.000244957518551166	3.73582429726434
ENSMUSG00000038775	Vill	1007.77884936115	protein_coding	-0.635146226937692	4.65385462490423	-10.3686646623787	1.63790164255293e-05	0.000263194152176861	3.73326376404737
ENSMUSG00000044712	Slc38a6	3554.94620356539	protein_coding	-0.496682583358348	6.20908410989095	-10.6279872283823	1.38967243305017e-05	0.000233286407490081	3.73269201689173
ENSMUSG00000002064	Sdf2	859.085804443979	protein_coding	0.766509090985487	4.30460063420631	10.4069073811932	1.59831518720092e-05	0.000259749989508927	3.73174022902682
ENSMUSG00000044279	Crb3	751.703030418098	protein_coding	0.63340487768365	4.65455435129319	10.3642588135344	1.64253331589414e-05	0.000263375045940784	3.73118842069591
ENSMUSG00000068856	Sf3b4	1676.54735228505	protein_coding	0.567699885207534	5.62245064884292	10.4614401479963	1.54372909861224e-05	0.000253483692263383	3.72855925798239
ENSMUSG00000036782	Klhl13	2038.61667997817	protein_coding	-0.356843215762574	6.65317458277527	-10.787164452828	1.25854756002645e-05	0.000217231567254763	3.7242277437628
ENSMUSG00000062248	Cks2	487.532	protein_coding	0.591898612570072	5.16701210109059	10.3737082963115	1.63261766833735e-05	0.000262548186730174	3.72270837525056
ENSMUSG00000028495	Rps6	659.76851197956	protein_coding	0.25338634672261	7.85052272250526	11.4429621971587	8.47950169868009e-06	0.000161572952786073	3.72212160019355
ENSMUSG00000066440	Zfyve26	9163.53	protein_coding	0.533330329704783	5.27569861540242	10.3829732471567	1.62296151991132e-05	0.000261757490368301	3.7189682295248
ENSMUSG00000005683	Cs	2623.53	protein_coding	-0.274329175759094	7.58460153170979	-11.2595542194774	9.44970977590232e-06	0.00017538871467331	3.71890909143067
ENSMUSG00000058076	Sdhc	375.565933030302	protein_coding	0.406868893586058	6.46901043142827	10.7020271764587	1.32684431149811e-05	0.000225894304341115	3.71406934663792
ENSMUSG00000029560	Snx8	1691.40631324462	protein_coding	0.48215994699454	5.48263167015481	10.4106550076664	1.59449461371702e-05	0.000259409684069208	3.71348901106487
ENSMUSG00000072324	Gm8420	393.546	processed_pseudogene	0.402063013295208	6.53449720618192	10.7241052332863	1.30873799171568e-05	0.000223924014437002	3.71156112979797
ENSMUSG00000035227	Spcs2	2610.53	protein_coding	0.350399220869027	6.28751924798753	10.6280335949438	1.38963204565133e-05	0.000233286407490081	3.70893331832813
ENSMUSG00000025465	Echs1	720.595919575357	protein_coding	-0.363136521472775	6.22213535854724	-10.6002647278464	1.41406019028499e-05	0.00023658738673649	3.70849888220891
ENSMUSG00000026281	Dtymk	794.91736395151	protein_coding	0.389557157364226	6.63118939881379	10.7559559176897	1.2831088983524e-05	0.00022069913730161	3.7062618811777
ENSMUSG00000002043	Trappc6a	581.545065225688	protein_coding	0.725777427879807	4.14234721203129	10.3922437027847	1.61336441499107e-05	0.000261347640463972	3.70100314799017
ENSMUSG00000087881	Gm22442	53.0838	scaRNA	1.65088181841365	2.89740821339974	11.8955088073318	6.53367258340545e-06	0.000133015127004573	3.70098304589504
ENSMUSG00000023990	Tfeb	1096.28937650473	protein_coding	-0.635441656014912	4.56998784811	-10.3211568831303	1.68863652898176e-05	0.000269187475116037	3.70052535472339
ENSMUSG00000048874	Phf3	2556.69944002783	protein_coding	0.199406645594252	7.72237859095161	11.3210432440683	9.11104381201595e-06	0.000170790864321439	3.69702587474239
ENSMUSG00000008167	Fbxw9	860.378561893483	protein_coding	0.873170255009192	3.96648846371432	10.4500067860122	1.55499614909276e-05	0.000255010449722255	3.69641011408179
ENSMUSG00000053510	Nrd1	1616.33643994969	protein_coding	-0.36801466787722	6.53528461837715	-10.6957543409513	1.33204042391562e-05	0.000226325054102227	3.6951760648509
ENSMUSG00000043004	Gng2	870.58768780621	protein_coding	-0.508750976456779	5.51196438299282	-10.3840698890687	1.62182286736976e-05	0.000261757490368301	3.69453509793297
ENSMUSG00000029505	Ep400	4037.95068398996	protein_coding	0.333987563064322	6.57014316179956	10.7108520463944	1.31957310800369e-05	0.000225038889457451	3.69211120203551
ENSMUSG00000027665	Pik3ca	4535.54301545407	protein_coding	-0.495245064042963	5.52506048717623	-10.3788175547475	1.62728464598188e-05	0.000262003958164332	3.6890692591148
ENSMUSG00000025060	Slk	4725.6389159528	protein_coding	-0.262815036122312	7.05883026222571	-10.9211523403462	1.15898697393945e-05	0.000204861173999451	3.68700639891882
ENSMUSG00000020326	Ccng1	3307.53	protein_coding	0.33250035947675	7.50263126607993	11.1669620372428	9.98700207218638e-06	0.000183771846458744	3.68671349073342
ENSMUSG00000057541	Pus7	1655.96621763673	protein_coding	-0.502559053905042	5.64513110489614	-10.3984967837995	1.6069273546973e-05	0.000260633104529044	3.6850503173492
ENSMUSG00000028187	Rpf1	1282.84446737221	protein_coding	0.344464240514011	6.24816589795758	10.5726632543582	1.43882498016365e-05	0.000239530481046745	3.68068436732894
ENSMUSG00000031066	Usp11	2904.02765168343	protein_coding	-0.527789927227997	5.7189897172832	-10.4081368983044	1.59706059443727e-05	0.000259686546548948	3.68035450402069
ENSMUSG00000039041	Adrm1	1211.76339920728	protein_coding	0.43123314990129	7.08614701331651	10.9240752709559	1.15691697614099e-05	0.000204736149682335	3.67887080985753
ENSMUSG00000038290	Smg6	4952.10893572016	protein_coding	0.391015954758283	6.01059791642284	10.4896410323675	1.51633216352946e-05	0.000250766456697285	3.6771125482517
ENSMUSG00000042750	Bex2	698.532	protein_coding	0.636944103544048	4.4880153449967	10.2863831750692	1.7269027927395e-05	0.000274269038155546	3.67586686240746
ENSMUSG00000081434	Gm14165	747.532	processed_pseudogene	0.327234520314643	6.40469611617725	10.6199563616956	1.39668781918916e-05	0.000233941317050252	3.6742691068968
ENSMUSG00000023845	Lnpep	4976.53	protein_coding	-0.34428418249257	6.2662267704676	-10.565169637103	1.44563312555549e-05	0.0002403975085214	3.67414714424294
ENSMUSG00000035597	Prpf39	4023.85078520035	protein_coding	-0.649187063121814	4.52893523942557	-10.2766032308491	1.73784150546581e-05	0.00027527885818525	3.67069543888137
ENSMUSG00000063952	Brpf3	1121.01499086413	protein_coding	0.744872565586309	4.31347884606805	10.3026252844002	1.70890831790759e-05	0.000271986154898332	3.67045489527452
ENSMUSG00000012443	Kif11	4614.53	protein_coding	-0.20385429171542	7.86861561735333	-11.3693975398583	8.85438507992116e-06	0.000167231563335356	3.66902545740307
ENSMUSG00000020349	Ppp2ca	5619.83490949507	protein_coding	-0.191301376139629	8.17127653199242	-11.5818559000124	7.81979305636984e-06	0.000151207825965803	3.66654970809114
ENSMUSG00000035557	Krt17	1346.53	protein_coding	-1.11754203480762	3.39555684994298	-10.8456752747932	1.21392309668982e-05	0.00021223369641723	3.6655878362032
ENSMUSG00000042272	Sestd1	3820.0464552382	protein_coding	-0.673240313112101	4.69420069407167	-10.2483847599195	1.76984645283223e-05	0.000278878427169143	3.65863929019878
ENSMUSG00000094265	n-R5s109	45.0903	rRNA	1.51690184634839	3.24429092472479	11.0532757307226	1.06947599136881e-05	0.000192320072200127	3.65451060494223
ENSMUSG00000041649	Klf8	3001.60139094708	protein_coding	-0.580650254256915	5.02998988206391	-10.252073346804	1.76562517947515e-05	0.000278359239339186	3.65385180163775
ENSMUSG00000078234	Klhdc7a	7602.53	protein_coding	-1.3723430703923	2.86814097121242	-11.7833083895906	6.96393560765663e-06	0.000139692457326084	3.65298960792349
ENSMUSG00000095280	Gm21738	476.532	protein_coding	2.55902338740724	2.5337175473206	14.4510918716745	1.74592546991139e-06	5.07239653706338e-05	3.64821646511939
ENSMUSG00000002190	Clgn	2863.084564681	protein_coding	-0.783959741197084	4.38964913575967	-10.25528478619	1.76195925625173e-05	0.000278073076108762	3.64585866964763
ENSMUSG00000055065	Ddx17	4556.53	protein_coding	-0.172880970154546	8.39339316052007	-11.7235791239838	7.20605962077508e-06	0.000143177991757151	3.6451043247391
ENSMUSG00000098943	Rnu3b1	79.6276	snoRNA	0.897146795905493	5.86972867471538	10.3873750102228	1.61839660880324e-05	0.000261598707358411	3.64326430685217
ENSMUSG00000099291	Rnu3b3	79.6276	snoRNA	0.897146795905493	5.86972867471538	10.3873750102228	1.61839660880324e-05	0.000261598707358411	3.64326430685217
ENSMUSG00000104896	ACEA_U3	79.6276	snoRNA	0.897146795905493	5.86972867471538	10.3873750102228	1.61839660880324e-05	0.000261598707358411	3.64326430685217
ENSMUSG00000105115	ACEA_U3	79.6276	snoRNA	0.897146795905493	5.86972867471538	10.3873750102228	1.61839660880324e-05	0.000261598707358411	3.64326430685217
ENSMUSG00000047965	Rpl9-ps7	374.562	processed_pseudogene	1.49811795377682	3.26217696029826	11.0000222286145	1.10457516644016e-05	0.000197450203309698	3.64090857936605
ENSMUSG00000005893	Nr2c2	3430.56287083286	protein_coding	-0.559029200806832	5.33081061595335	-10.2616232922317	1.75474902410309e-05	0.000277518175922493	3.63538654097114
ENSMUSG00000032253	Phip	4723.90810136102	protein_coding	-0.322466824999299	6.70774909257215	-10.6770665917551	1.34765782061826e-05	0.000228192643269936	3.63310484371697
ENSMUSG00000022141	Nipbl	8610.53	protein_coding	-0.34564543020714	6.82051810335169	-10.7237384217179	1.30903651608169e-05	0.000223924014437002	3.63179387858325
ENSMUSG00000001542	Ell2	3442.53	protein_coding	-0.689795236963905	5.04568901115922	-10.2178960537981	1.8051797942824e-05	0.000283257690017712	3.63145332408656
ENSMUSG00000032422	Snx14	2789.52816046614	protein_coding	-0.608745579350966	4.87047510680953	-10.1995335597725	1.8268457540209e-05	0.000286059864838844	3.62636545714967
ENSMUSG00000091542	Gm17167	4849.53	processed_transcript	0.47336466741251	5.3484181777729	10.2544653397302	1.76289385013157e-05	0.000278074526522854	3.62577728930808
ENSMUSG00000100768	Gm29055	1505.53	sense_intronic	-0.555071065173122	5.5776867577213	-10.2928765414166	1.71968319835752e-05	0.000273469914526531	3.62507907199263
ENSMUSG00000025860	Xiap	5913.72744985838	protein_coding	-0.534494999444997	5.57562506843392	-10.292544950231	1.72005104481062e-05	0.000273469914526531	3.6247966031953
ENSMUSG00000065176	Rnu12	55.387	snRNA	1.00585257838783	4.20403202125017	10.2562304613732	1.76088139444306e-05	0.000278073076108762	3.62417864275269
ENSMUSG00000022889	Mrpl39	1569.11156850101	protein_coding	0.434899019079492	6.01518364078563	10.4048192382411	1.60044847946655e-05	0.000259956088429678	3.6190517874808
ENSMUSG00000030232	Aebp2	2110.44055074262	protein_coding	0.441129365954372	6.23088510358363	10.4718190961209	1.53358125421715e-05	0.00025254710930644	3.61710706212103
ENSMUSG00000055817	Mta3	1253.62653204415	protein_coding	-0.409274428691305	5.87989717675695	-10.3581366579021	1.64899394868534e-05	0.00026426996887491	3.61644522970815
ENSMUSG00000035898	Uba6	4654.91808667424	protein_coding	-0.289123831365224	6.80618278372605	-10.6955772830241	1.33218742479149e-05	0.000226325054102227	3.61565934249351
ENSMUSG00000021102	Glrx5	725.532	protein_coding	0.638642874433136	4.43806436644561	10.186487977314	1.84241745011274e-05	0.000287598971212664	3.61083021512602
ENSMUSG00000021835	Bmp4	1501.87510844169	protein_coding	0.493004311678542	5.90047436693676	10.3561047636168	1.65114454709873e-05	0.000264473574071267	3.6093450679503
ENSMUSG00000040586	Ofd1	4248.53	protein_coding	-0.535289071744224	5.06422568103587	-10.187122465708	1.8416566282678e-05	0.000287598971212664	3.60891858107003
ENSMUSG00000031226	Pbdc1	2011.79391065121	protein_coding	0.491245607495415	5.38252157994036	10.2334573464177	1.78704687484089e-05	0.000280999327797456	3.6078531793929
ENSMUSG00000036376	Abt1	1073.53	protein_coding	0.65165868369407	4.89163022342593	10.171292703243	1.86074516891077e-05	0.000290007943882778	3.60679531640783
ENSMUSG00000030451	Herc2	7228.24836360102	protein_coding	-0.248678381201398	7.25402749446142	-10.8935738132362	1.17872619588746e-05	0.000207983226425263	3.59976309713903
ENSMUSG00000029267	Mtf2	1710.93990031414	protein_coding	-0.198175273542805	8.70160092157885	-11.9106875247428	6.47781874767446e-06	0.000132110536727418	3.59627962555776
ENSMUSG00000022407	Adsl	938.904738107782	protein_coding	0.291017259091518	7.1256850036291	10.8193089281205	1.23380581188963e-05	0.000214304224517177	3.5920781278437
ENSMUSG00000038807	Rap1gap2	5786.32947927975	protein_coding	-0.694165871306129	4.28174999838922	-10.1765160810251	1.85442179613749e-05	0.000289172395184927	3.58813519424757
ENSMUSG00000078495	Gm13157	2464.35023346879	protein_coding	-0.480525060671234	6.68718848421859	-10.5965119262559	1.41739873051999e-05	0.000236948368474103	3.58809735565069
ENSMUSG00000028447	Dctn3	547.0637465103	protein_coding	0.62884771427233	5.05909499495018	10.1561200705777	1.87925210999483e-05	0.000292134747300749	3.58801342648483
ENSMUSG00000021764	Ndufs4	1329.53	protein_coding	0.378021694046504	6.08885781656777	10.382878390171	1.62306005331692e-05	0.000261757490368301	3.58770810455219
ENSMUSG00000024258	Polr2d	751.532	protein_coding	0.698824491120898	5.04841618197262	10.1531865689233	1.88285429914414e-05	0.000292543375568677	3.58731610200723
ENSMUSG00000097482	Gm17634	155.121664369815	antisense	3.41946935860805	2.40943581691407	20.0414732133931	1.84161486203401e-07	9.57416695315914e-06	3.58667334232996
ENSMUSG00000010095	Slc3a2	631.427933649433	protein_coding	-0.235033735236573	7.94658377960776	-11.2931633901339	9.26286128221417e-06	0.000173093831140116	3.58415966948542
ENSMUSG00000046841	Ckap4	2710.52977504274	protein_coding	-0.531891015084937	5.5693519013049	-10.2263087486107	1.79535106292289e-05	0.000281862612799216	3.58088504850974
ENSMUSG00000002308	Cd320	832.218925464621	protein_coding	0.606009190526234	4.62978181937226	10.1253797463079	1.91739124575976e-05	0.000295465074583769	3.57995003333305
ENSMUSG00000022124	Fbxl3	1260.76369593192	protein_coding	-0.528218160585658	5.82857807223984	-10.2873829097922	1.72578901087235e-05	0.000274237091420959	3.57976385902485
ENSMUSG00000037787	Apopt1	740.63215250695	protein_coding	0.616111065865408	4.9073516097045	10.1299006357414	1.91172758153024e-05	0.000295046235733961	3.57905943780966
ENSMUSG00000028873	Cdca8	789.570997453313	protein_coding	0.362882391398912	6.38381074891855	10.4715709359087	1.53382300404091e-05	0.00025254710930644	3.57853573621179
ENSMUSG00000002847	Pla1a	1767.53	protein_coding	-0.745953398050668	4.33726570983318	-10.1496516788579	1.88720536733035e-05	0.000292736261007867	3.57674919864716
ENSMUSG00000053877	Srcap	2774.36939077177	protein_coding	0.660513762805539	5.45271927087688	10.1970025257631	1.82985518672379e-05	0.000286232787641141	3.57604053967239
ENSMUSG00000019494	Cops6	915.340572090444	protein_coding	0.472434616684326	6.25488277399963	10.4154591027479	1.5896121485016e-05	0.000258755446643146	3.57317065855154
ENSMUSG00000054312	Mrps21	208.631769251419	protein_coding	0.700747874843641	4.51553201430169	10.1192031619536	1.92515990196948e-05	0.000296054912457936	3.57250825742719
ENSMUSG00000029614	Rpl6	339.792948071057	protein_coding	0.122076547287902	10.3285467701273	14.0796086631477	2.08523008283789e-06	5.73276109416246e-05	3.56919012601156
ENSMUSG00000085156	Gm11974	336.877871066045	processed_transcript	0.558567184760522	5.31549594683862	10.1611285227736	1.8731200321242e-05	0.000291634113188083	3.56766487874875
ENSMUSG00000024370	Cdc23	1424.10396470272	protein_coding	-0.263833811403812	6.94492224931474	-10.685648229623	1.3404604737521e-05	0.00022743928162494	3.56457250470696
ENSMUSG00000030861	Acadsb	1498.49671142885	protein_coding	-0.669420616897927	4.4964305928905	-10.1086480553539	1.93851842939363e-05	0.000297256053191463	3.56387538649119
ENSMUSG00000025393	Atp5b	820.593616200919	protein_coding	-0.058489422157411	10.9672245744542	-15.7488289483014	9.69484967101006e-07	3.27326446926046e-05	3.55978294068601
ENSMUSG00000026600	Soat1	1877.29982185902	protein_coding	-0.520127847155866	6.23283661182766	-10.3798872359998	1.6261706201307e-05	0.000262003958164332	3.55893572967398
ENSMUSG00000036820	Amdhd2	1013.36422057141	protein_coding	0.653119610157905	4.63936831453183	10.0852232879371	1.96854188261728e-05	0.0003010316286553	3.5543000109551
ENSMUSG00000051510	Mafg	2854.52012884178	protein_coding	-0.355664628944666	6.2224983125389	-10.3667028769112	1.63996214868392e-05	0.000263243710501085	3.54885606641075
ENSMUSG00000031442	Mcf2l	2119.06136417751	protein_coding	-0.543719947574432	4.90088279071871	-10.0808660180638	1.97418454434985e-05	0.000301587551465017	3.54773419303236
ENSMUSG00000034345	Gtf2h5	811.848736879795	protein_coding	0.559389664538231	4.80646519642337	10.0684401024843	1.99037706932392e-05	0.000303444142851925	3.54210410929817
ENSMUSG00000036977	Anapc10	2597.53	protein_coding	0.775640080825794	4.19339965559606	10.1106574739297	1.9359672339235e-05	0.000297256053191463	3.53949156963072
ENSMUSG00000075595	Zfp652	7009.97980706924	protein_coding	-0.362462895195551	6.44472991069983	-10.4296862592683	1.57525207801933e-05	0.000257534002679015	3.53714000781928
ENSMUSG00000054920	Klhl5	2918.6495088975	protein_coding	-0.891643878339477	3.63639562259987	-10.3455225392567	1.66239654188211e-05	0.000266134010053359	3.53446112991105
ENSMUSG00000071516	Hist1h2ai	194.831	protein_coding	0.699648937791492	9.2386237683772	12.3147815829299	5.17291575966175e-06	0.000111507134621288	3.53283428392228
ENSMUSG00000036257	Pnpla8	2438.66243905368	protein_coding	-0.391475554135005	5.91397688287421	-10.2444967295624	1.77430836609958e-05	0.000279412696975392	3.53180525239156
ENSMUSG00000005148	Klf5	1516.53	protein_coding	-0.450954799663891	5.81483989514088	-10.2140168153309	1.80973253496008e-05	0.000283823867134737	3.53067947023438
ENSMUSG00000018509	Cenpv	387.958942786941	protein_coding	0.479829894578379	5.77939616943608	10.2042296512944	1.82127689354971e-05	0.000285336545225627	3.5278419117856
ENSMUSG00000078915	Hsp25-ps1	389.549	pseudogene	0.564064795322517	6.5703722715879	10.4646356870079	1.54059662038632e-05	0.000253107642678997	3.52714225323542
ENSMUSG00000024981	Acsl5	2945.53	protein_coding	-0.86884972230711	3.70734393596546	-10.278109968415	1.73615113452802e-05	0.000275156146842999	3.52240236161978
ENSMUSG00000048330	Ric3	3213.77671720392	protein_coding	-0.96587699466191	3.89502367011096	-10.1897195898321	1.83854610007049e-05	0.00028729314488309	3.52040115219331
ENSMUSG00000030647	Ndufc2	323.689942114484	protein_coding	0.612258929878589	4.93912631144348	10.0275352279508	2.04475454457538e-05	0.000309847853302802	3.51005926208519
ENSMUSG00000038072	Galnt11	2411.94825873996	protein_coding	-0.587191853756106	4.77963188678785	-10.014062268659	2.06303222395206e-05	0.000311988199786289	3.50765907626495
ENSMUSG00000025220	Mgea5	4819.53	protein_coding	-0.383111535116927	7.72015402664345	-11.0197704740063	1.09140883005406e-05	0.000195561979333897	3.50618645750214
ENSMUSG00000001127	Araf	1187.7278878851	protein_coding	0.490094527797159	5.60718504670762	10.1267213382296	1.9157085482703e-05	0.000295357240466774	3.50399853123759
ENSMUSG00000034880	Mrpl34	440.534	protein_coding	0.665485793009321	4.57793859165299	10.005771501174	2.07437166773269e-05	0.000313072798813158	3.50221550192873
ENSMUSG00000038260	Trpm4	4040.53	protein_coding	-0.802884639499755	3.94370067528829	-10.1238180982613	1.91935206055387e-05	0.000295615633355116	3.49952634760223
ENSMUSG00000001918	Slc1a5	1312.00041509344	protein_coding	-0.558706681754362	5.22261872847569	-10.0393248889995	2.0289109510655e-05	0.000308380096957852	3.49746260405856
ENSMUSG00000038909	Kat7	1535.61143678695	protein_coding	0.217655818307507	7.81170547651928	11.0759584453162	1.054911699322e-05	0.000190616046557054	3.49462164707552
ENSMUSG00000024286	Ccny	3812.53	protein_coding	-0.500637032705751	5.76156245956229	-10.1463831619753	1.8912387052709e-05	0.000292818070073199	3.49445746020021
ENSMUSG00000065990	Aurkaip1	575.236631259061	protein_coding	0.452706830307835	6.03718629807277	10.2271177595028	1.79440908085866e-05	0.000281861988869429	3.49224152235368
ENSMUSG00000042354	Gnl3	1678.53	protein_coding	-0.241491020560521	7.59960795364065	-10.927690092633	1.1543627872188e-05	0.000204509210566446	3.48903570744723
ENSMUSG00000086228	Ubap1l	1176.53	protein_coding	-0.870892221989717	4.08466961569605	-10.0566862496617	2.00583251002366e-05	0.000305349136643054	3.48427124899149
ENSMUSG00000019961	Tmpo	3391.46356220416	protein_coding	-0.21118450162519	7.84610976138356	-11.0749418694307	1.05555959090465e-05	0.000190616046557054	3.48265704129552
ENSMUSG00000022571	Pycrl	1148.53	protein_coding	0.591026476703376	4.60045427910847	9.97473854443091	2.11744768107621e-05	0.00031781810873456	3.48263534476466
ENSMUSG00000036315	Znrd1	370.506879660921	protein_coding	0.673443681193419	4.91159799932853	9.97955675798819	2.11069363984375e-05	0.000316962684576036	3.4799154513358
ENSMUSG00000082099	Gm12013	56.7214	processed_pseudogene	0.343682293893712	6.36907960067765	10.3223582564968	1.68733178408673e-05	0.00026912225467103	3.47885508001442
ENSMUSG00000026455	Klhl12	3070.68913269995	protein_coding	-0.431415303881992	5.98909387417498	-10.1841492272429	1.84522494994976e-05	0.0002878876662567	3.4755453931668
ENSMUSG00000034205	Loxl2	5111.53	protein_coding	-0.909388768599231	3.79495553317388	-10.150574509374	1.88606836396063e-05	0.000292736261007867	3.47497892761448
ENSMUSG00000021576	Pdcd6	1319.53	protein_coding	0.471248747840611	5.58681224134825	10.0768665877078	1.97937994831642e-05	0.000302227581641058	3.47271069610103
ENSMUSG00000082762	Gm12366	668.532	processed_pseudogene	0.676826176727113	4.43607756016718	9.96617232881194	2.12951615386088e-05	0.00031899217800282	3.47180631248275
ENSMUSG00000029802	Abcg2	1034.65064416842	protein_coding	-0.4145703532283	5.64191454552613	-10.0835336883025	1.97072773989231e-05	0.000301212603540306	3.47021866376103
ENSMUSG00000045948	Mrps12	431.084714371252	protein_coding	0.642932809056818	4.61588137148566	9.94757709957268	2.15598324016548e-05	0.000322795916211921	3.46510352077799
ENSMUSG00000085101	Platr16	319.579862538454	processed_transcript	-0.775352391640598	4.01899686949938	-10.0320942838179	2.03861126228238e-05	0.000309123944831012	3.46109870533394
ENSMUSG00000024853	Sf3b2	3026.53	protein_coding	0.14937042706277	8.23373830465153	11.3212060583952	9.11016555680838e-06	0.000170790864321439	3.45922058580869
ENSMUSG00000022656	Pvrl3	1784.81927846584	protein_coding	-0.431502441874214	5.60238792944814	-10.0545252307952	2.00868887126584e-05	0.000305460991359652	3.45682693867442
ENSMUSG00000029715	Pop7	701.553102429977	protein_coding	0.762576723695182	3.96623132009283	10.026210829991	2.04654308932643e-05	0.000309962566991783	3.45369899564436
ENSMUSG00000044252	Osbpl1a	1628.03422917647	protein_coding	-0.349970114830897	6.50435066943872	-10.32951733882	1.67958036777707e-05	0.000268455906762411	3.45114162471271
ENSMUSG00000074800	Gm4149	168.736	pseudogene	0.592747561984194	7.56638286876471	10.840829497451	1.2175498357802e-05	0.000212383011238398	3.44745305675609
ENSMUSG00000021311	Mtr	4277.53	protein_coding	-0.474131343875019	5.53626301580656	-10.0214891521502	2.0529339674399e-05	0.000310773867947614	3.44488242874587
ENSMUSG00000007029	Vars	964.268064826625	protein_coding	-0.238564954062139	7.53248986823364	-10.8217401352909	1.23195706705813e-05	0.000214230774930728	3.44381296498367
ENSMUSG00000051579	Tceal8	970.668762914634	protein_coding	0.544440605421919	4.92590816322054	9.92203591520606	2.19294666825336e-05	0.000326152191828147	3.44010121357546
ENSMUSG00000025289	Prdx4	787.108404140346	protein_coding	0.689493073314778	4.89659027209175	9.91612005322579	2.20161027441055e-05	0.000327040537707832	3.43833765086937
ENSMUSG00000021678	F2rl1	2549.53	protein_coding	0.619224992468714	4.9869016554009	9.92159179505407	2.19359572592993e-05	0.000326152191828147	3.43640803948309
ENSMUSG00000026123	Plekhb2	2265.86643081755	protein_coding	-0.524862648517848	5.02449628947215	-9.92377445579468	2.19040797782693e-05	0.000326152191828147	3.4360659327834
ENSMUSG00000036932	Aifm1	1851.01064257941	protein_coding	-0.471734837805215	5.4275521399792	-9.98457915248925	2.10367936484764e-05	0.000316067306171533	3.43486846499847
ENSMUSG00000024002	Brd4	3926.08563307805	protein_coding	0.708207640634946	4.90434054581301	9.91045896860465	2.20993710634807e-05	0.00032760927532636	3.43432479737048
ENSMUSG00000058267	Mrps14	595.710573877937	protein_coding	0.437190454671291	5.452292582734	9.98795373168475	2.09898126958872e-05	0.000315519200449582	3.43123011767424
ENSMUSG00000026171	Rnf25	594.711496279175	protein_coding	0.550184234159377	4.77321719691336	9.89612256648294	2.23118450354913e-05	0.000330107647204075	3.42943974036597
ENSMUSG00000000365	Rnf17	4943.53	protein_coding	-0.509300970236408	6.1269848497998	-10.1572314763314	1.8778894023705e-05	0.000292074009585048	3.42816187312113
ENSMUSG00000073640	Rpl27-ps3	271.436	protein_coding	0.60828913903544	5.07892644425075	9.91303938961289	2.20613717230285e-05	0.000327267635205322	3.42356831100702
ENSMUSG00000090544	Gm6576	617.532	protein_coding	1.11188423992396	3.29007769442525	10.3982157859459	1.60721599426265e-05	0.000260633104529044	3.41850050682385
ENSMUSG00000013033	Adgrl1	4519.1510640019	protein_coding	-0.283498439719524	6.84345255394309	-10.4270548732995	1.57789691985484e-05	0.000257727276435727	3.41829103332879
ENSMUSG00000030062	Rpn1	982.414127604043	protein_coding	-0.21224845588492	7.54876705526891	-10.7881205875819	1.25780354291057e-05	0.000217231567254763	3.41339316012929
ENSMUSG00000024228	Nudt12	2539.76532961417	protein_coding	-1.50357489936518	2.6610430367217	-11.7107723482745	7.259210891535e-06	0.000143696988194819	3.4116877654467
ENSMUSG00000025223	Ldb1	1680.02963555179	protein_coding	-0.308108155370283	7.19456121866438	-10.5862463447325	1.42657690319277e-05	0.000238052552340222	3.4115151639954
ENSMUSG00000035575	Utp6	2285.6207616475	protein_coding	-0.351200276237653	6.80651526577864	-10.3982131665961	1.60721868512203e-05	0.000260633104529044	3.41104443643084
ENSMUSG00000079941	Gm11273	192.216	protein_coding	0.769573919503431	4.16611372822093	9.90562814180543	2.21707095411877e-05	0.000328504758877293	3.41038289536119
ENSMUSG00000036371	Serbp1	669.519401483658	protein_coding	-0.131302051510231	10.0307614898707	-13.226987169391	3.18899693738124e-06	7.8610474956004e-05	3.40850919442604
ENSMUSG00000071074	Yipf3	823.992737508072	protein_coding	0.942921674497284	3.55824838187652	10.1423395914097	1.89624198791793e-05	0.000293409760530102	3.40654993893229
ENSMUSG00000028964	Park7	487.163327595219	protein_coding	0.258850296999544	7.12667245473243	10.5501639589585	1.45937632494592e-05	0.000242414589211166	3.40587745354249
ENSMUSG00000020902	Ntn1	5362.86450658337	protein_coding	-0.305835433292653	6.55175631430309	-10.2790085822772	1.73514388989555e-05	0.000275141629274256	3.40174785289674
ENSMUSG00000048707	Tprn	1665.39335686936	protein_coding	0.58138277304691	4.86294994318662	9.85384266165664	2.29520653055349e-05	0.0003389123392462	3.3977879263115
ENSMUSG00000028382	Ptbp3	2426.22066104151	protein_coding	-0.259156892258291	7.21091472275387	-10.5741984570482	1.43743470225335e-05	0.000239431681640859	3.39595696329386
ENSMUSG00000061167	Rpl15-ps3	410.539	processed_pseudogene	0.57133227635299	8.46855924229168	11.3905797653423	8.7445458643144e-06	0.000165573319897154	3.39582403608443
ENSMUSG00000023067	Cdkn1a	1503.4701199403	protein_coding	0.778634356310455	4.34359502597295	9.85083151437168	2.29984497410668e-05	0.000339263827329071	3.39216878969259
ENSMUSG00000021477	Ctsl	1766.53	protein_coding	-0.291519657237051	7.14901802019475	-10.5343226091562	1.47404595657679e-05	0.000244580932905444	3.39107381177606
ENSMUSG00000024369	Nelfe	668.146830221424	protein_coding	0.462472079708552	5.70979217683926	9.98860528098684	2.09807555192864e-05	0.000315519200449582	3.39054078789134
ENSMUSG00000051811	Cox6b2	278.051060959411	protein_coding	0.975426948133148	3.67354243162826	10.0382851859663	2.03030255167174e-05	0.00030843559845897	3.38421370994675
ENSMUSG00000021114	Atp6v1d	1198.53	protein_coding	0.329456175497952	6.25432591064049	10.1369271841844	1.90296249524748e-05	0.000293897014309999	3.3775262567936
ENSMUSG00000041278	Ttc1	1003.87609129061	protein_coding	0.409430309542558	5.70527898740966	9.96784024424065	2.1271602193478e-05	0.000318957272610688	3.37631195940121
ENSMUSG00000002428	Hltf	3537.65218781979	protein_coding	-0.34065228591553	6.27743976318648	-10.1383109284301	1.90124175425023e-05	0.000293880727744163	3.37576909185029
ENSMUSG00000087260	Lamtor5	538.532	protein_coding	0.545507601888684	4.87493551234998	9.81743617714823	2.35200656618203e-05	0.000345770280367925	3.37250316737112
ENSMUSG00000056836	Gm6851	196.584	processed_pseudogene	1.06640111017349	3.53325250239511	10.1056872404558	1.94228448427101e-05	0.000297622164547983	3.3718785740417
ENSMUSG00000031672	Got2	1831.87507191324	protein_coding	-0.245493730236213	7.73183308198509	-10.8348885469541	1.22201302891722e-05	0.00021299460270263	3.36994231493371
ENSMUSG00000074653	Lrrc31	1440.82213222024	protein_coding	-0.670740054741815	4.55024917528055	-9.80205112028584	2.3764872781194e-05	0.000348686846778369	3.36879864091483
ENSMUSG00000064338	mt-Tv	28.993	Mt_tRNA	2.11709614153197	2.3088909301394	13.5484465324963	2.70907549851154e-06	6.9815617199634e-05	3.36636360204661
ENSMUSG00000031146	Plp2	944.662894779629	protein_coding	0.277118599087796	6.77296165116326	10.3259375962803	1.68345123435212e-05	0.000268788661748389	3.36601779917381
ENSMUSG00000034254	Agpat1	1230.29542521209	protein_coding	0.520001914287539	5.57715702330009	9.91602678570835	2.20174717222851e-05	0.000327040537707832	3.36290758458898
ENSMUSG00000010025	Aldh3a2	1972.64591862683	protein_coding	-0.580142957219179	4.63208363378664	-9.79181412373686	2.39293636479793e-05	0.000349997553004681	3.36284313372447
ENSMUSG00000062554	Gm12751	184.481	processed_pseudogene	0.602247699994259	4.6809321475115	9.78404272895903	2.40550982263048e-05	0.000351230148980676	3.35704046794422
ENSMUSG00000036845	Lin37	545.48199761555	protein_coding	1.05435390994323	3.17269113468141	10.3822293405312	1.62373444056878e-05	0.000261757490368301	3.35641149306277
ENSMUSG00000032849	Abcc4	5487.81250157396	protein_coding	-0.434488828364635	6.18160441153747	-10.0741788108522	1.98288017581731e-05	0.000302608260046391	3.35537200083406
ENSMUSG00000059495	Arhgef12	10242.3239438028	protein_coding	-0.374209323555138	5.96894368021919	-10.0044041304963	2.07624862614575e-05	0.000313198769914928	3.35270018313324
ENSMUSG00000021245	Mlh3	5214.97438313943	protein_coding	-0.492125727307741	5.805315113696	-9.94377015619881	2.16144763003784e-05	0.000323291885689433	3.34495614527183
ENSMUSG00000054309	Cpsf3	2355.53	protein_coding	-0.352189589219014	6.64041665154111	-10.2303235886833	1.7906818396312e-05	0.000281423632840366	3.34282543351874
ENSMUSG00000067547	Gm7666	614.532	transcribed_processed_pseudogene	0.36009731124255	6.42349819029432	10.1490131641942	1.88799252498668e-05	0.000292736261007867	3.34279352824701
ENSMUSG00000031753	Cog4	1481.54740126439	protein_coding	-0.388940481306251	6.36570052178648	-10.1170882484015	1.92782815094541e-05	0.000296313596459123	3.3391381945864
ENSMUSG00000001418	Glmp	497.642660957148	protein_coding	0.465824996121412	5.29427855005009	9.82241489998413	2.34414571953017e-05	0.000344888548875272	3.33770110687805
ENSMUSG00000034509	Mad2l1bp	1064.53	protein_coding	0.998345092799381	3.56612748260497	10.0124529543427	2.06522780733542e-05	0.000312163130697293	3.33456277085079
ENSMUSG00000058240	Cryzl1	800.866014986892	protein_coding	-0.391064907322003	5.79353649839815	-9.92627972973056	2.18675552742872e-05	0.000325941551804095	3.33304959584843
ENSMUSG00000027288	Zfp106	1900.55709782064	protein_coding	-0.165105089460242	8.61983256009655	-11.4305546418014	8.54144698357283e-06	0.00016254714402114	3.32959077441511
ENSMUSG00000070697	Utp3	1424.53	protein_coding	0.375373962633433	6.16375854818627	10.0318435499112	2.0389485795037e-05	0.000309123944831012	3.32545264764235
ENSMUSG00000044816	D630023F18Rik	1507.86059085587	protein_coding	1.74706048515367	2.50589596100438	11.9487837122562	6.34000793816095e-06	0.000130576352661959	3.32397871085616
ENSMUSG00000074643	Cpne1	766.318051700513	protein_coding	0.589008997363915	5.44059745243409	9.82196104058512	2.34486107807974e-05	0.000344888548875272	3.31870175558317
ENSMUSG00000024030	Abcg1	3405.53	protein_coding	-0.701314029301676	4.58870468783796	-9.71603311437845	2.51879577561623e-05	0.000364758044633697	3.31245401622079
ENSMUSG00000024446	Rpp21	243.420911154551	protein_coding	0.913720940475109	3.81582023859013	9.84645601269349	2.30660404852202e-05	0.000339930756269361	3.31171509398336
ENSMUSG00000016503	Gtf3a	1178.27807818835	protein_coding	0.406951839870016	5.61154284261253	9.85196856926757	2.29809218020787e-05	0.000339171767795021	3.3111101889101
ENSMUSG00000078517	Emc1	3523.95587569127	protein_coding	-0.366383806216912	6.14363497793622	-10.0007130114507	2.08132496081043e-05	0.000313806993213209	3.31089006194403
ENSMUSG00000020186	Csrp2	768.532	protein_coding	0.352958662861641	6.53438654612962	10.1469504316865	1.89053799613022e-05	0.000292818070073199	3.31069638707415
ENSMUSG00000029246	Ppat	2955.49021746863	protein_coding	-0.278976192802714	6.94614069662793	-10.316184541128	1.694048895149e-05	0.000269764044781836	3.30677142901816
ENSMUSG00000029465	Arpc3	594.488230508376	protein_coding	0.405679822409327	6.13084305227773	9.99257646398272	2.09256478596849e-05	0.000314869700819065	3.30565962611141
ENSMUSG00000052102	Gnpda1	771.45126455367	protein_coding	-0.257030349554536	7.47573703231475	-10.586021796447	1.42677841780006e-05	0.000238052552340222	3.3033794181459
ENSMUSG00000027944	Hax1	413.021177233543	protein_coding	0.378484929695557	7.08979345052021	10.3823842736963	1.62357343024756e-05	0.000261757490368301	3.3025101233146
ENSMUSG00000065362	Gm24411	48.8931	snoRNA	1.02742108219322	3.47215485854581	10.0087409770638	2.07030215654627e-05	0.000312615625638487	3.29810221107099
ENSMUSG00000026349	Ccnt2	4384.26965765165	protein_coding	-0.306141195420764	7.27738341023707	-10.4671220010092	1.53816435815708e-05	0.000252978186429038	3.29761192030199
ENSMUSG00000066724	Gm10175	384.552	protein_coding	0.379427281828497	5.88519990929968	9.90369257301128	2.21993659606232e-05	0.000328767248768244	3.2960923536691
ENSMUSG00000025198	Erlin1	1744.60885944444	protein_coding	-0.689382867546281	4.27194103051204	-9.71073734508614	2.52786781304154e-05	0.000365543310462393	3.29581953485052
ENSMUSG00000039361	Picalm	3969.53	protein_coding	-0.22833095389853	7.56457642975113	-10.6227677956218	1.39422732230635e-05	0.000233776406804327	3.29261307335887
ENSMUSG00000005687	Bcas2	793.982701859417	protein_coding	0.330227898174897	7.20681365628383	10.4237505702027	1.58122525633502e-05	0.000257949173331221	3.28919558342884
ENSMUSG00000018821	Avpi1	820.150576579132	protein_coding	0.61383948421665	5.07082183777121	9.71487426515105	2.52077781122829e-05	0.000364869231452789	3.28833451278644
ENSMUSG00000041287	Sox15	656.532	protein_coding	1.15158054261884	3.51113122172979	9.96963631312331	2.12462657077389e-05	0.000318736414504167	3.28431752082041
ENSMUSG00000080712	Hist3h2bb-ps	261.717	processed_pseudogene	3.10806318306975	2.42170440500236	14.9357377999814	1.39368428603805e-06	4.25165676255404e-05	3.28020369391465
ENSMUSG00000024423	Impact	3227.53	protein_coding	-0.282944979853222	7.29356916431309	-10.4445585101413	1.56039796720751e-05	0.000255522607719992	3.27499596515815
ENSMUSG00000066324	Impad1	6338.53	protein_coding	-0.422080150691674	6.39828669327385	-10.0348073644445	2.0349653447573e-05	0.000308831685073799	3.27260496345129
ENSMUSG00000035310	Lin54	2022.13518481624	protein_coding	-0.487816346206132	5.82894104051672	-9.8464401801075	2.30662854681762e-05	0.000339930756269361	3.27110678759522
ENSMUSG00000063550	Nup98	3846.53	protein_coding	-0.259123818738721	6.92462680378027	-10.2560159714263	1.76112580025051e-05	0.000278073076108762	3.27070572583404
ENSMUSG00000092607	Scnm1	391.878057175191	protein_coding	0.642253695616073	4.71457086428131	9.65580691484846	2.62418369150283e-05	0.000376609742746622	3.2700729233625
ENSMUSG00000098950	Gm28036	1712.34727979446	protein_coding	-0.782438465256329	5.32156343057564	-9.71622912174477	2.51846070940276e-05	0.000364758044633697	3.26661784611342
ENSMUSG00000029330	Cds1	2237.70982207794	protein_coding	-0.524241620208104	5.41465396739504	-9.73942193667718	2.47916778259384e-05	0.000360583314129537	3.26642695302727
ENSMUSG00000019777	Hdac2	1768.44584654379	protein_coding	-0.320798772391328	6.95269211848073	-10.2602797668193	1.7562745240237e-05	0.000277613325472847	3.26584197867476
ENSMUSG00000046516	Cox17	282.426161847529	protein_coding	0.516974794587792	5.15211087141305	9.68869456372372	2.56602855978537e-05	0.000369815789894439	3.26129528094352
ENSMUSG00000024012	Mtch1	593.993739222115	protein_coding	0.327193435213211	6.80503930799557	10.1902686617654	1.83788924970829e-05	0.00028729314488309	3.26014939053998
ENSMUSG00000001666	Ddt	444.533	protein_coding	0.920881389788414	4.11325791800361	9.67793100475524	2.58489944768178e-05	0.000371905739897558	3.25868261382128
ENSMUSG00000038116	Phf20	1120.91195647416	protein_coding	-0.427790978374944	7.30109204126228	-10.418862852331	1.58616313587792e-05	0.000258450725115845	3.25861546891686
ENSMUSG00000025178	Pi4k2a	3566.53	protein_coding	-0.500405849563399	5.29964025720579	-9.70677561474957	2.53467875480304e-05	0.000366334618748394	3.2585062215916
ENSMUSG00000023977	Ubr2	7443.53	protein_coding	-0.376072480719057	6.1492995099812	-9.92496279724123	2.18867462803101e-05	0.000326065859681228	3.25564462788598
ENSMUSG00000039481	Nrtn	818.532	protein_coding	1.16632424595724	2.95943010207916	10.4494238716543	1.55557307844152e-05	0.000255010449722255	3.2536115425714
ENSMUSG00000021796	Bmpr1a	3024.92188204539	protein_coding	-0.423456258690178	5.5397596944481	-9.74983286592391	2.46175598142174e-05	0.00035843969768042	3.25324414777515
ENSMUSG00000019947	Arid5b	4289.53	protein_coding	0.393667072245455	6.54764323112161	10.0705528368883	1.98761331909218e-05	0.00030317661231168	3.25273993105454
ENSMUSG00000046058	Eid2	1187.53	protein_coding	0.639282098689001	4.32205645792471	9.63436215896419	2.66290842330331e-05	0.000380674287401718	3.25169564200018
ENSMUSG00000000738	Spg7	1241.13024189273	protein_coding	-0.333159634818436	6.17602528419777	-9.92698892822719	2.18572283767568e-05	0.000325941551804095	3.24991088945965
ENSMUSG00000088712	Gm22728	48.2561	scaRNA	1.52376947066899	2.55772844360942	11.370791391489	8.84710937929095e-06	0.000167199238829128	3.24657977959955
ENSMUSG00000037035	Inhbb	4050.53	protein_coding	-0.912133048605233	3.9198326510654	-9.7122140262788	2.52533443396504e-05	0.00036535278963031	3.24526115249432
ENSMUSG00000021952	Xpo4	3230.85935519772	protein_coding	-0.280372603773882	6.75724324595583	-10.1366533424934	1.90330323753622e-05	0.000293897014309999	3.23935520806043
ENSMUSG00000063236	1110038F14Rik	805.532	protein_coding	0.672955442995073	4.38363814034868	9.60810051417387	2.71121626770362e-05	0.000386843958348652	3.23706831465224
ENSMUSG00000020038	Cry1	2809.53	protein_coding	-0.618907279388314	4.62907373022885	-9.60246696809613	2.72170794307604e-05	0.000387969091731211	3.23617308669735
ENSMUSG00000030872	Gga2	2730.07768289708	protein_coding	-0.256685036057373	7.60659366205269	-10.565563174637	1.44527467861774e-05	0.0002403975085214	3.23584379528855
ENSMUSG00000021000	Ctage5	1110.28679589198	protein_coding	-0.382398751901711	5.79797673114061	-9.79069742999302	2.39473849039111e-05	0.000349997553004681	3.23553766534723
ENSMUSG00000026319	2310035C23Rik	3123.64396764601	protein_coding	-0.44986938962461	5.80571335512599	-9.79104910786526	2.39417078514235e-05	0.000349997553004681	3.23543453653176
ENSMUSG00000039428	Tmem135	721.177342914055	protein_coding	-0.615134670287027	4.58860540818822	-9.5993255294582	2.7275783943219e-05	0.000388440773322174	3.23436743548291
ENSMUSG00000042541	Shfm1	1280.05493833844	protein_coding	0.601872541414337	5.64230873550957	9.74774734216139	2.46523279648599e-05	0.000358730170952094	3.2338063778104
ENSMUSG00000055041	Commd5	803.043114281565	protein_coding	0.65270060583368	4.3923312391579	9.57839412589998	2.76706139105342e-05	0.000392575201793032	3.21777756416553
ENSMUSG00000046229	Scand1	554.532	protein_coding	1.31714467182669	3.17176523836323	10.1495574872224	1.88732146290302e-05	0.000292736261007867	3.21742303320921
ENSMUSG00000013089	Etv5	1752.15344882775	protein_coding	-0.220836748517547	8.39859049811565	-11.0751807682972	1.05540729353886e-05	0.000190616046557054	3.21456902051635
ENSMUSG00000058569	Tmed9	1215.53	protein_coding	0.437157590667042	5.73406495534523	9.73792136557005	2.48168890634619e-05	0.000360775374682132	3.20795165144911
ENSMUSG00000107029	Gm43123	3266.53	TEC	2.40233194631946	2.6409198349001	11.7575542073766	7.06718354637208e-06	0.000141198004245302	3.20589475025368
ENSMUSG00000001518	Itfg2	726.127446420579	protein_coding	0.498145661981549	5.10157370370965	9.60211074492328	2.72237290239452e-05	0.000387969091731211	3.20576754797759
ENSMUSG00000039967	Zfp292	9781.45133497611	protein_coding	-0.255523324447511	7.43302673450608	-10.4218153452719	1.58317825408681e-05	0.00025812763622927	3.20459693795787
ENSMUSG00000069305	Hist1h4n	228.368	protein_coding	0.504180749775555	6.40925050029835	9.94488254872651	2.15984930840932e-05	0.000323213704523863	3.20259479464165
ENSMUSG00000027313	Chac1	1432.53	protein_coding	-0.44503872700141	5.71732939079295	-9.71644928990714	2.51808440156431e-05	0.000364758044633697	3.19870294062442
ENSMUSG00000053367	Gm6792	431.185843620582	protein_coding	0.757139736986604	3.91737437493787	9.61850171810712	2.69196566780799e-05	0.000384645156214752	3.19687844537483
ENSMUSG00000087687	Pet100	984.532	protein_coding	1.05310592593907	3.17431941131996	10.058070225461	2.00400563668897e-05	0.000305349136643054	3.19592589783101
ENSMUSG00000022516	Nudt16l1	1064.53	protein_coding	0.603416151692172	4.80095068386587	9.55211201029551	2.8175574885273e-05	0.000398422517518856	3.19527039394391
ENSMUSG00000087590	Epb41l4aos	211.487309026067	lincRNA	0.755771154369115	4.36691193676767	9.54639340086359	2.82868248783842e-05	0.000399056713976792	3.19522332607032
ENSMUSG00000056708	Ier5	3071.53	protein_coding	1.37229936206949	2.8987658432373	10.4667028387191	1.53857410253994e-05	0.000252978186429038	3.19492158561384
ENSMUSG00000031684	Slc10a7	3425.53	protein_coding	-0.641319334911064	4.35544550854565	-9.54354746620929	2.83423751413577e-05	0.000399652759560139	3.19230014869137
ENSMUSG00000039801	2410089E03Rik	6643.45968102683	protein_coding	-0.429760167346961	5.62599329210238	-9.68282887229122	2.57629298113418e-05	0.000370939280259228	3.19083926567472
ENSMUSG00000014856	Tmem208	593.008663017704	protein_coding	0.794577438074414	4.22938062105082	9.55089522592248	2.81992046734603e-05	0.000398569097475451	3.19012048627837
ENSMUSG00000020256	Aldh1l2	4130.34422663387	protein_coding	-1.53781293103687	3.06515600796322	-10.3420223361332	1.66613739966937e-05	0.000266590855818238	3.18738328402143
ENSMUSG00000025353	Ormdl2	1850.53	protein_coding	0.561954450607773	5.00338063704299	9.56106505520336	2.80023960069328e-05	0.000396533457875741	3.18681587566533
ENSMUSG00000040451	Sgms1	1405.50319660023	protein_coding	-0.604558833881285	4.63577457319946	-9.52946682820975	2.86190419519355e-05	0.000402746558976332	3.18643647840291
ENSMUSG00000067150	Xpo5	3504.53	protein_coding	-0.277745099584508	6.75895931083843	-10.0566192630174	2.00592098150817e-05	0.000305349136643054	3.18118653502288
ENSMUSG00000028081	Rps3a1	772.532	protein_coding	0.504033082700329	6.06787642883894	9.79397858485463	2.38944772172097e-05	0.000349734605893781	3.17891928035889
ENSMUSG00000026917	Wdr5	1780.24441418868	protein_coding	-0.189150478564981	7.66707749437831	-10.5214431678022	1.48609611573598e-05	0.000246172558885064	3.17757963552168
ENSMUSG00000068749	Psma5	839.719016351056	protein_coding	0.433982663199161	6.97090402875752	10.1462173673271	1.89144355556617e-05	0.000292818070073199	3.17575863817804
ENSMUSG00000035161	Ints6	4788.53	protein_coding	-0.402715172054836	5.78001920961373	-9.69961994936032	2.54703341767681e-05	0.000367607142976803	3.17382874112388
ENSMUSG00000026276	Sept2	1860.85366967058	protein_coding	-0.219065590523521	7.94348660199294	-10.6864435598292	1.33979564828536e-05	0.00022743928162494	3.1717528328121
ENSMUSG00000004610	Etfb	281.89827300218	protein_coding	0.51878128532798	5.80801965567397	9.70613719935257	2.53577825217697e-05	0.000366334618748394	3.17158493332684
ENSMUSG00000042745	Id1	738.975454140238	protein_coding	1.32911542175353	3.31614445433326	9.92724076600952	2.18535626051309e-05	0.000325941551804095	3.16844068252455
ENSMUSG00000021242	Npc2	3056.53	protein_coding	0.29285701231769	6.90789499123882	10.1083430515266	1.93890600104918e-05	0.000297256053191463	3.16752767841223
ENSMUSG00000089762	Ier5l	2478.53	protein_coding	1.03424608930094	3.30911705857789	9.87647476753162	2.26068083843832e-05	0.000334053933710262	3.16353296428646
ENSMUSG00000065045	Gm24046	60.1256	snRNA	3.5778667927573	2.28802223869405	18.5268307601725	3.17026430485834e-07	1.4390222371101e-05	3.16325611910876
ENSMUSG00000081559	Gm12411	279.254	processed_pseudogene	0.374846543904571	7.27415538513371	10.2795583508791	1.7345279881294e-05	0.000275141629274256	3.16222266639311
ENSMUSG00000038717	Atp5l	306.846	protein_coding	0.791067689749716	4.1485569186884	9.5127341698504	2.89518034286845e-05	0.000406339440088062	3.15845821337046
ENSMUSG00000041406	BC055324	2465.50322012244	protein_coding	-0.343021982533126	6.18838466552286	-9.80102601355916	2.3781286615201e-05	0.000348710033560073	3.1559972476175
ENSMUSG00000028049	Scamp3	1078.4080206517	protein_coding	0.515738880749069	4.88782894498545	9.50153230743993	2.91770230422392e-05	0.000408356015554842	3.15415936981166
ENSMUSG00000021569	Trip13	3177.53	protein_coding	-0.390841852095367	5.73142883676932	-9.65919498092269	2.61812410617963e-05	0.000376241086879922	3.15388857569547
ENSMUSG00000047281	Sfn	1408.53	protein_coding	0.518155593047501	4.96794051060487	9.50853427336634	2.90360131251689e-05	0.000407093096544041	3.15269037697954
[truncated: 2,016 more rows]
