# Supplementary figures and images for: Epigenetic reprogramming by TET enzymes impacts co-transcriptional R-loops
Source: eLife journal article supplement (doi:10.7554/elife.69476), 2022-02-22

**A**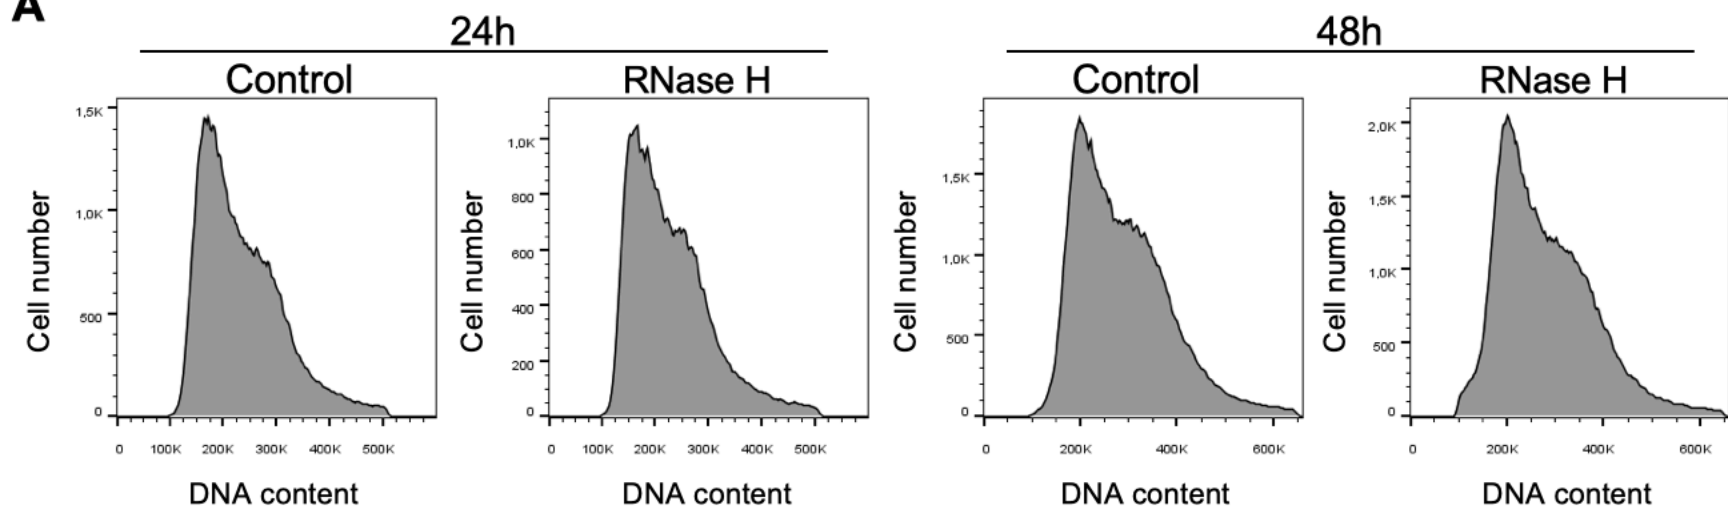**B**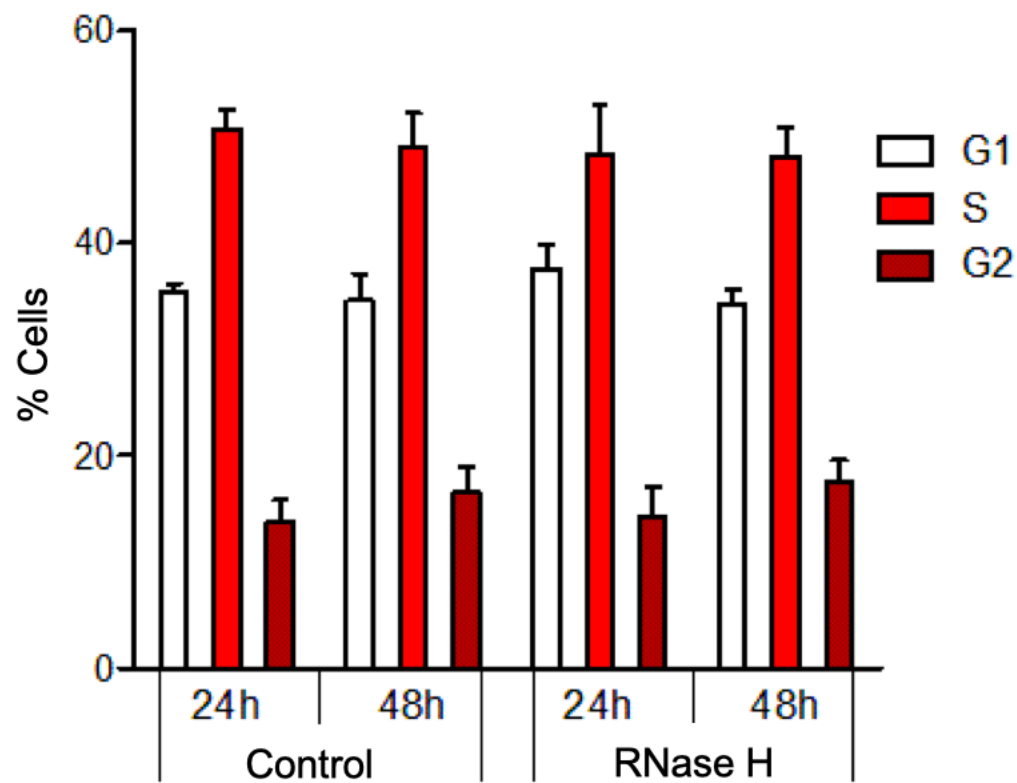

Supplement: supp [file elife-69476-supp-v1.zip]

**A**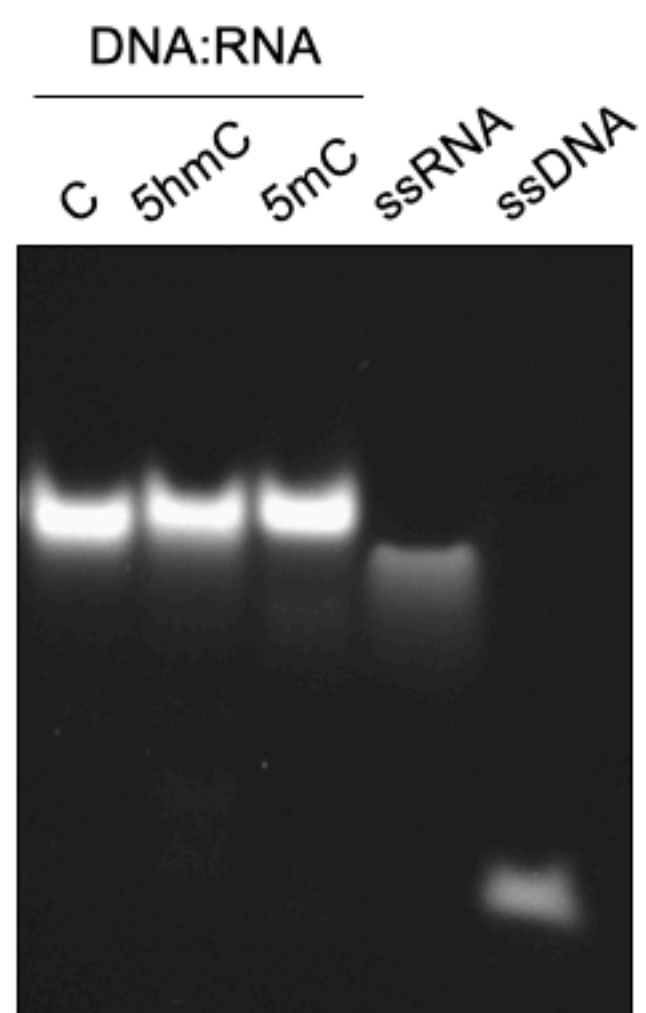**B**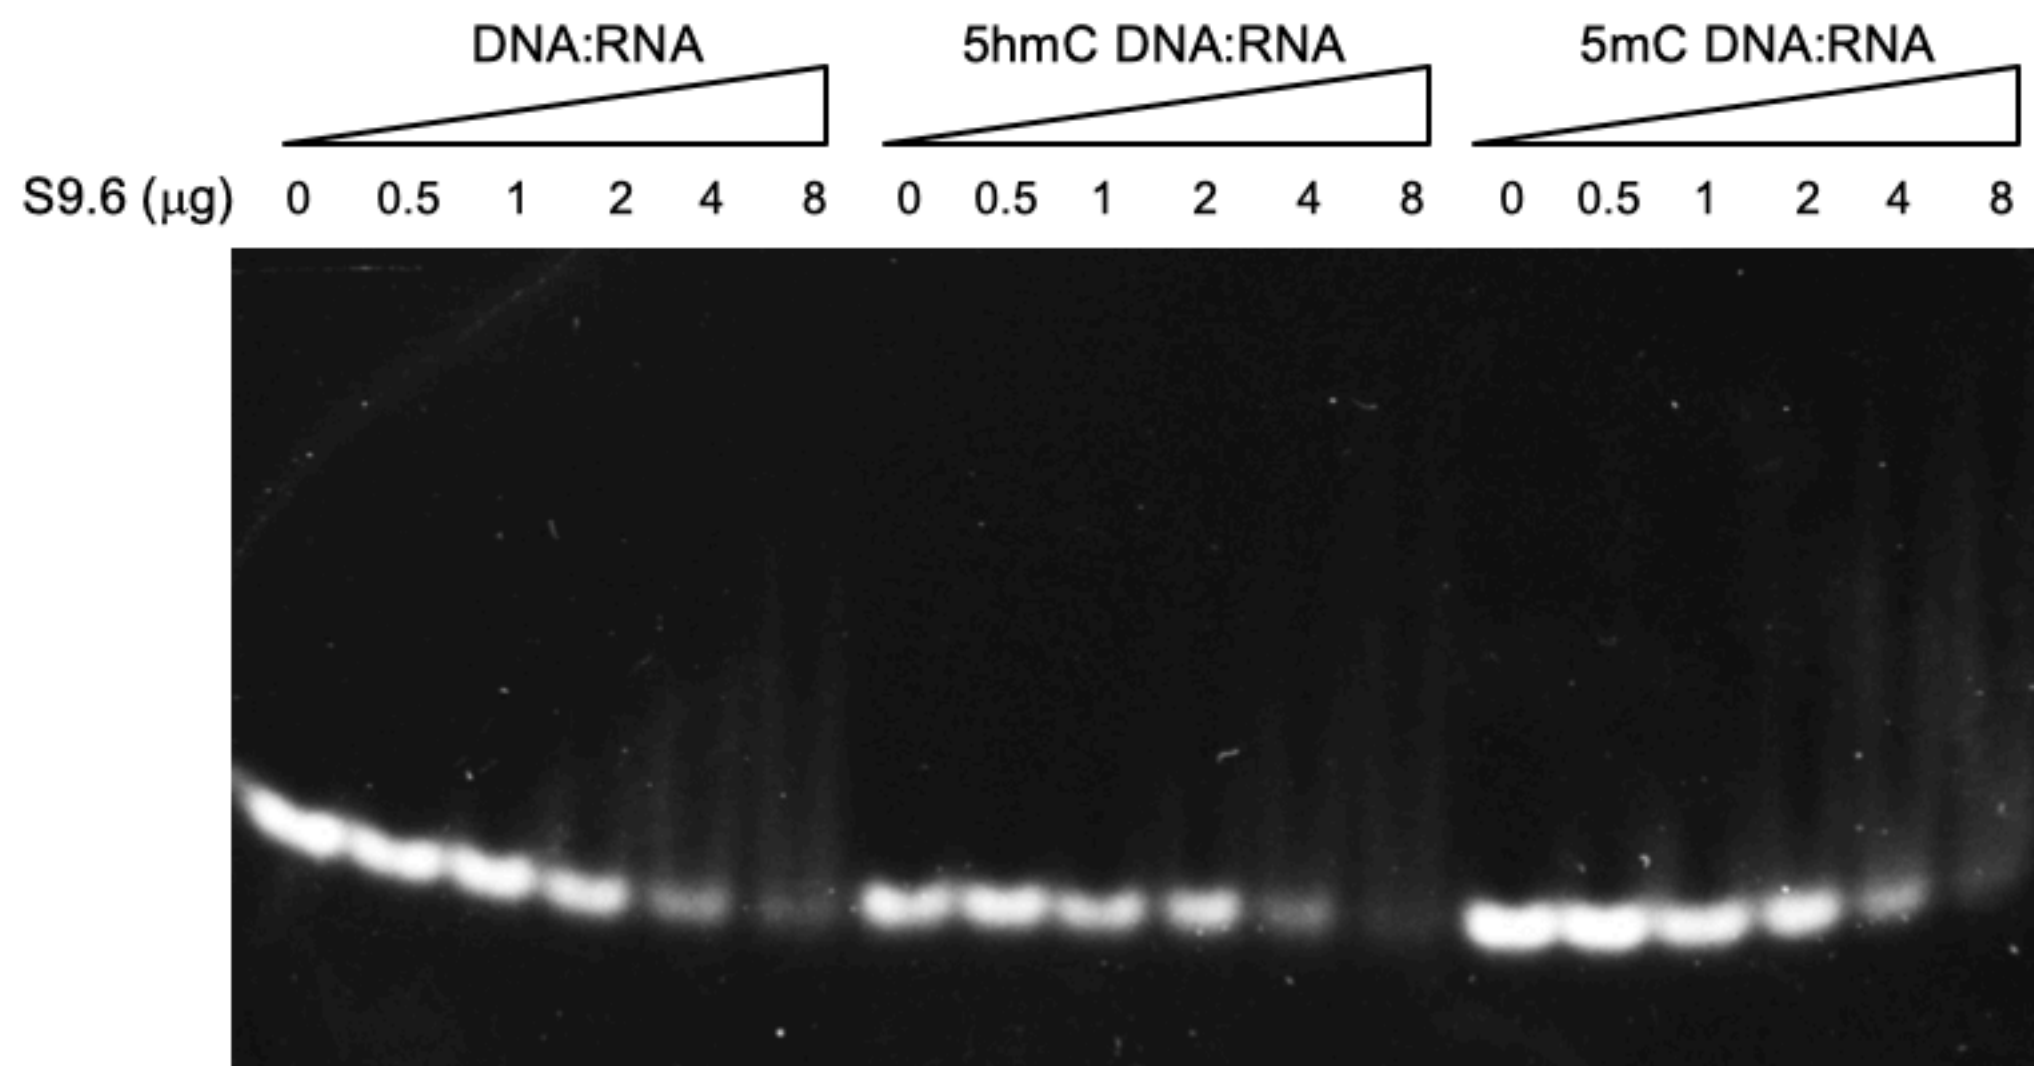**C**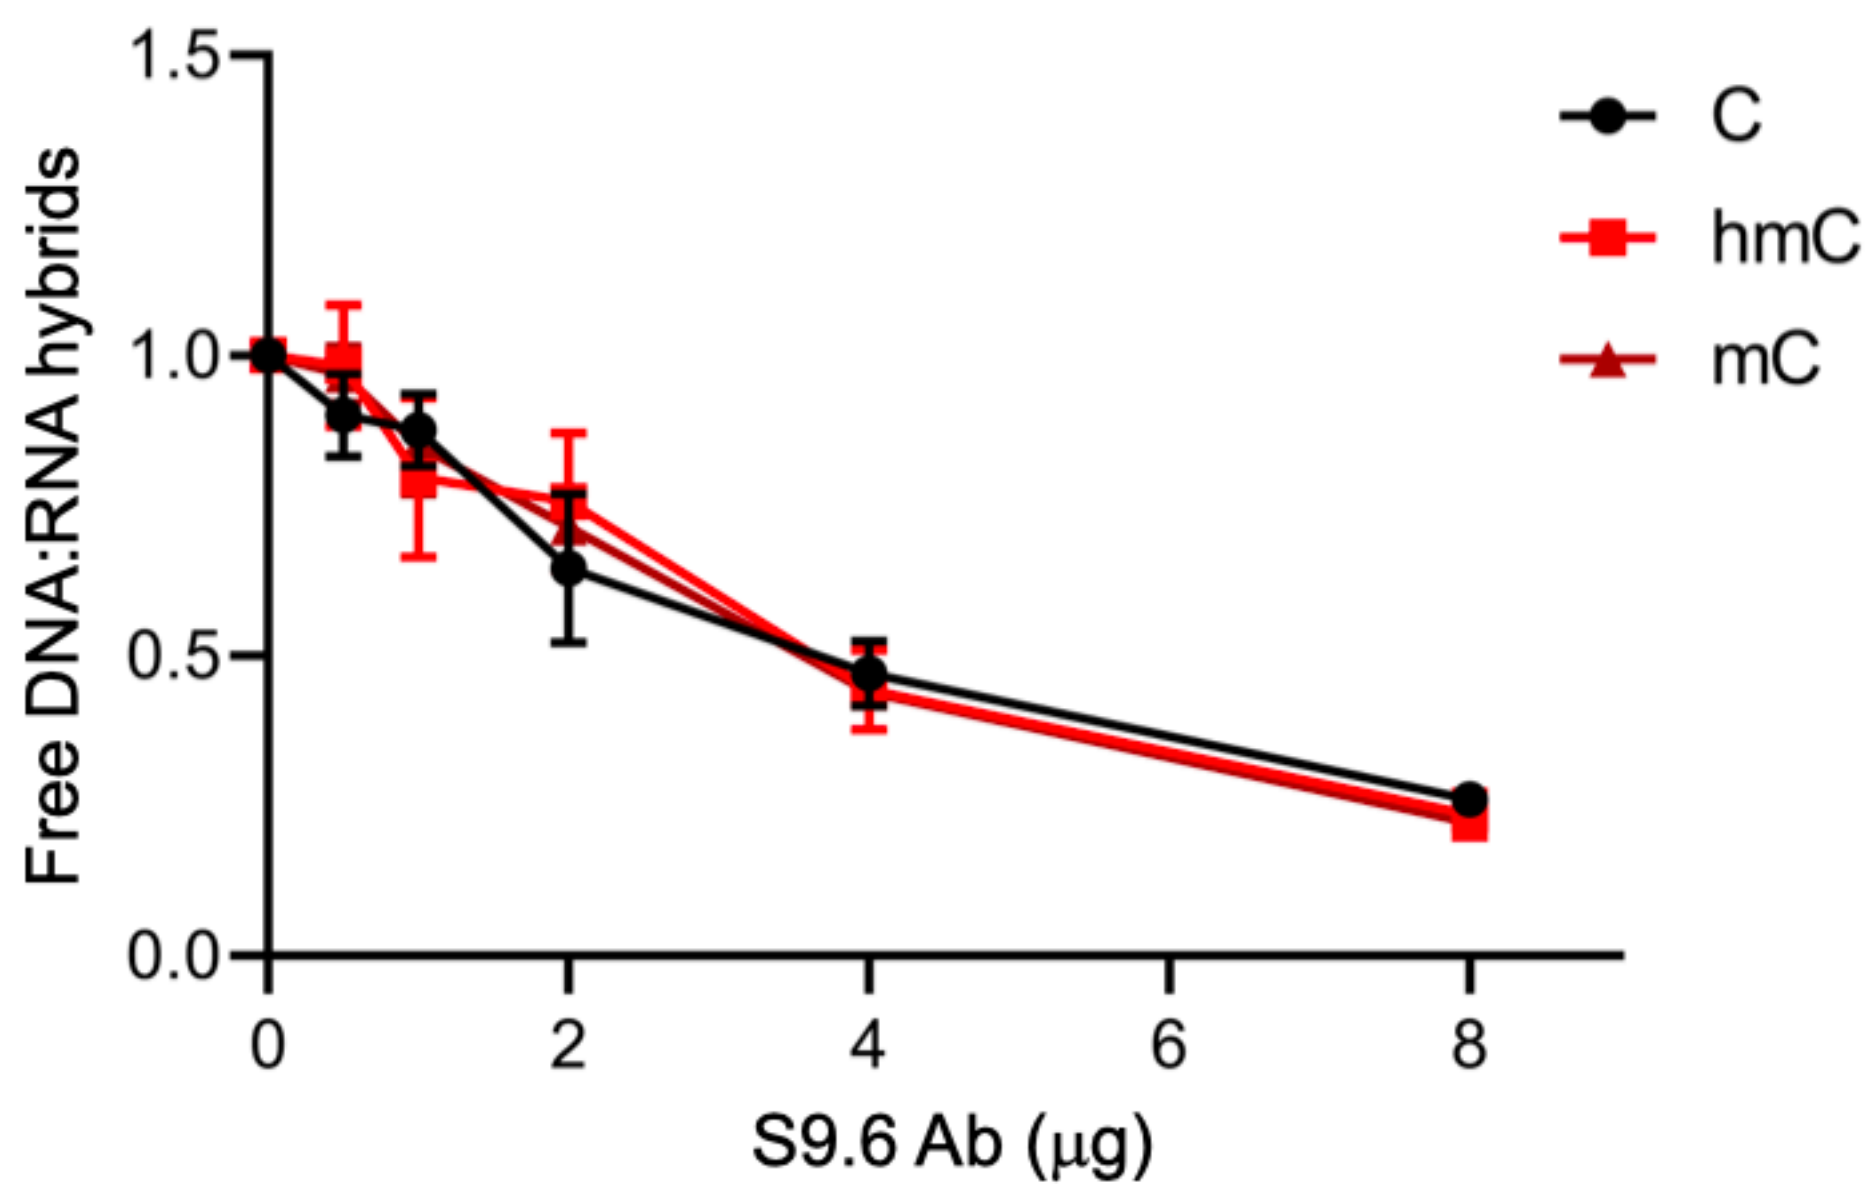

Supplement: supp [file elife-69476-supp-v1.zip]

**A**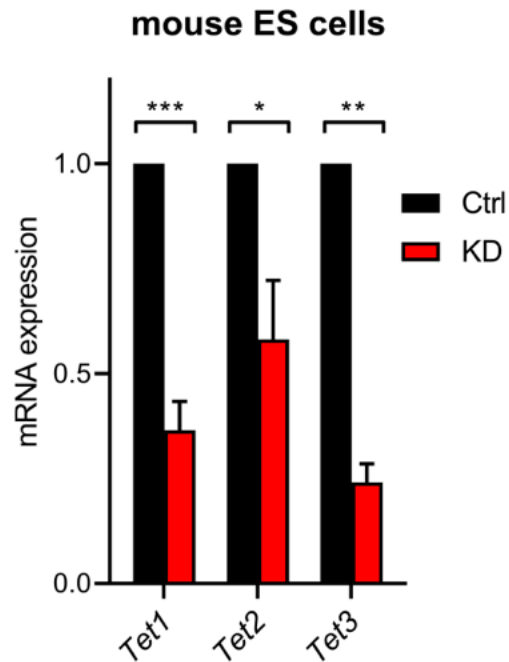**B**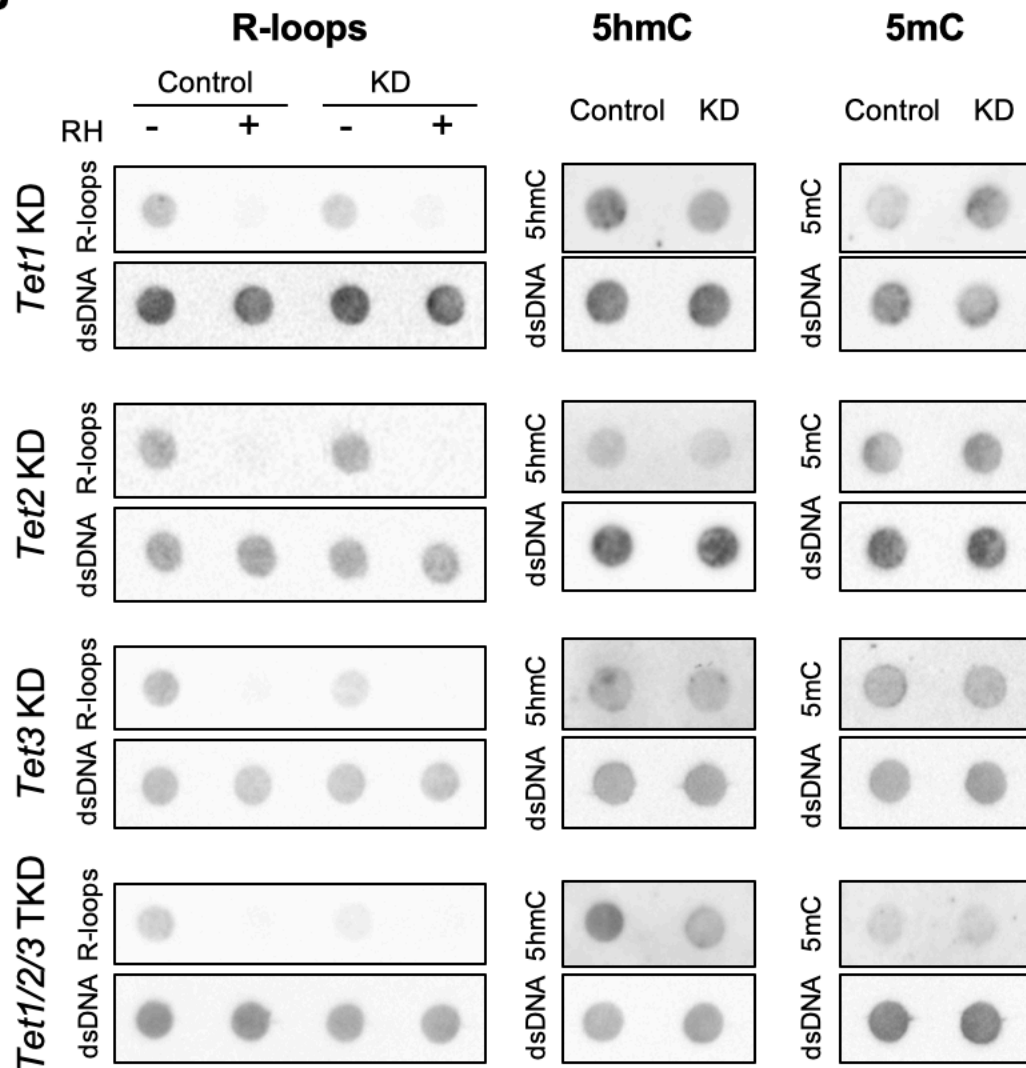

Supplement: supp [file elife-69476-supp-v1.zip]

chr17 (qC) 17qA1 A2 A3.2 17qA3.3 17qB1 qB3 17qC 17qD 17qE1.1 E1.3 17qE2 qE3 17qE4 17qE5

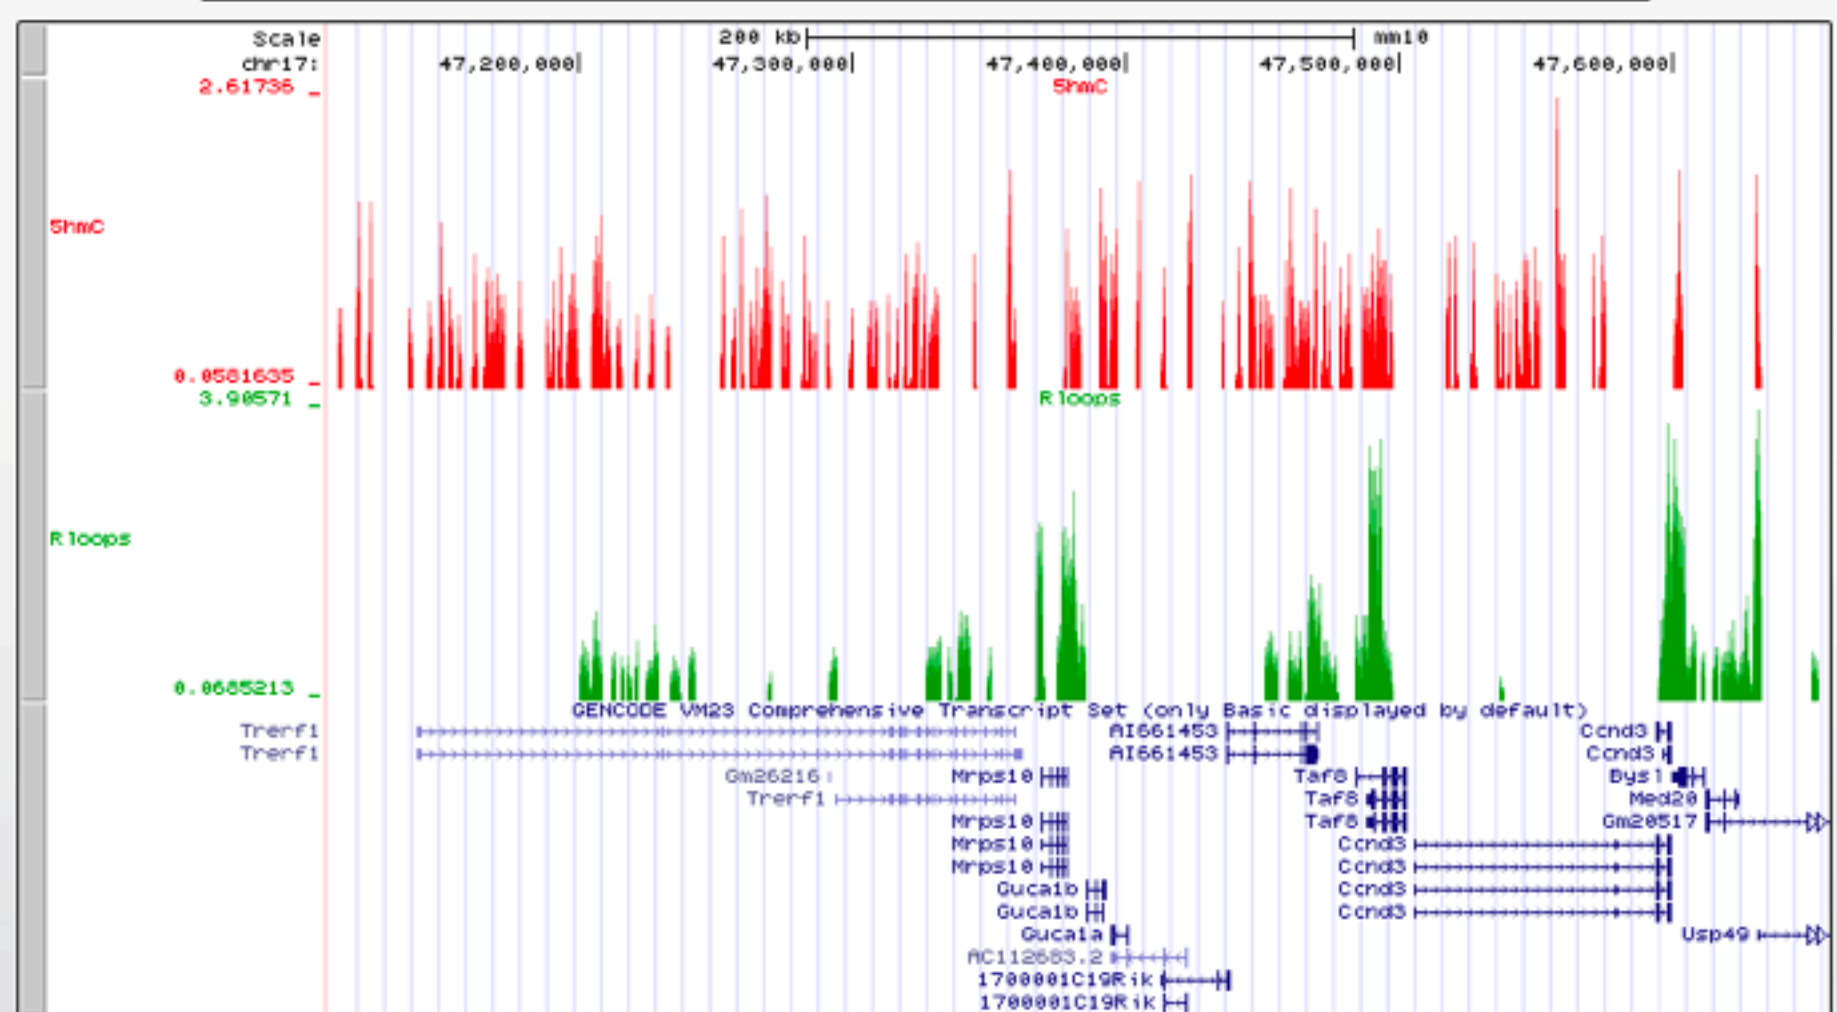

chr17 (qB1) 17qA1 A2 A3.2 17qA3.3 17qB1 qB3 17qC 17qD 17qE1.1 E1.3 17qE2 qE3 17qE4 17qE5

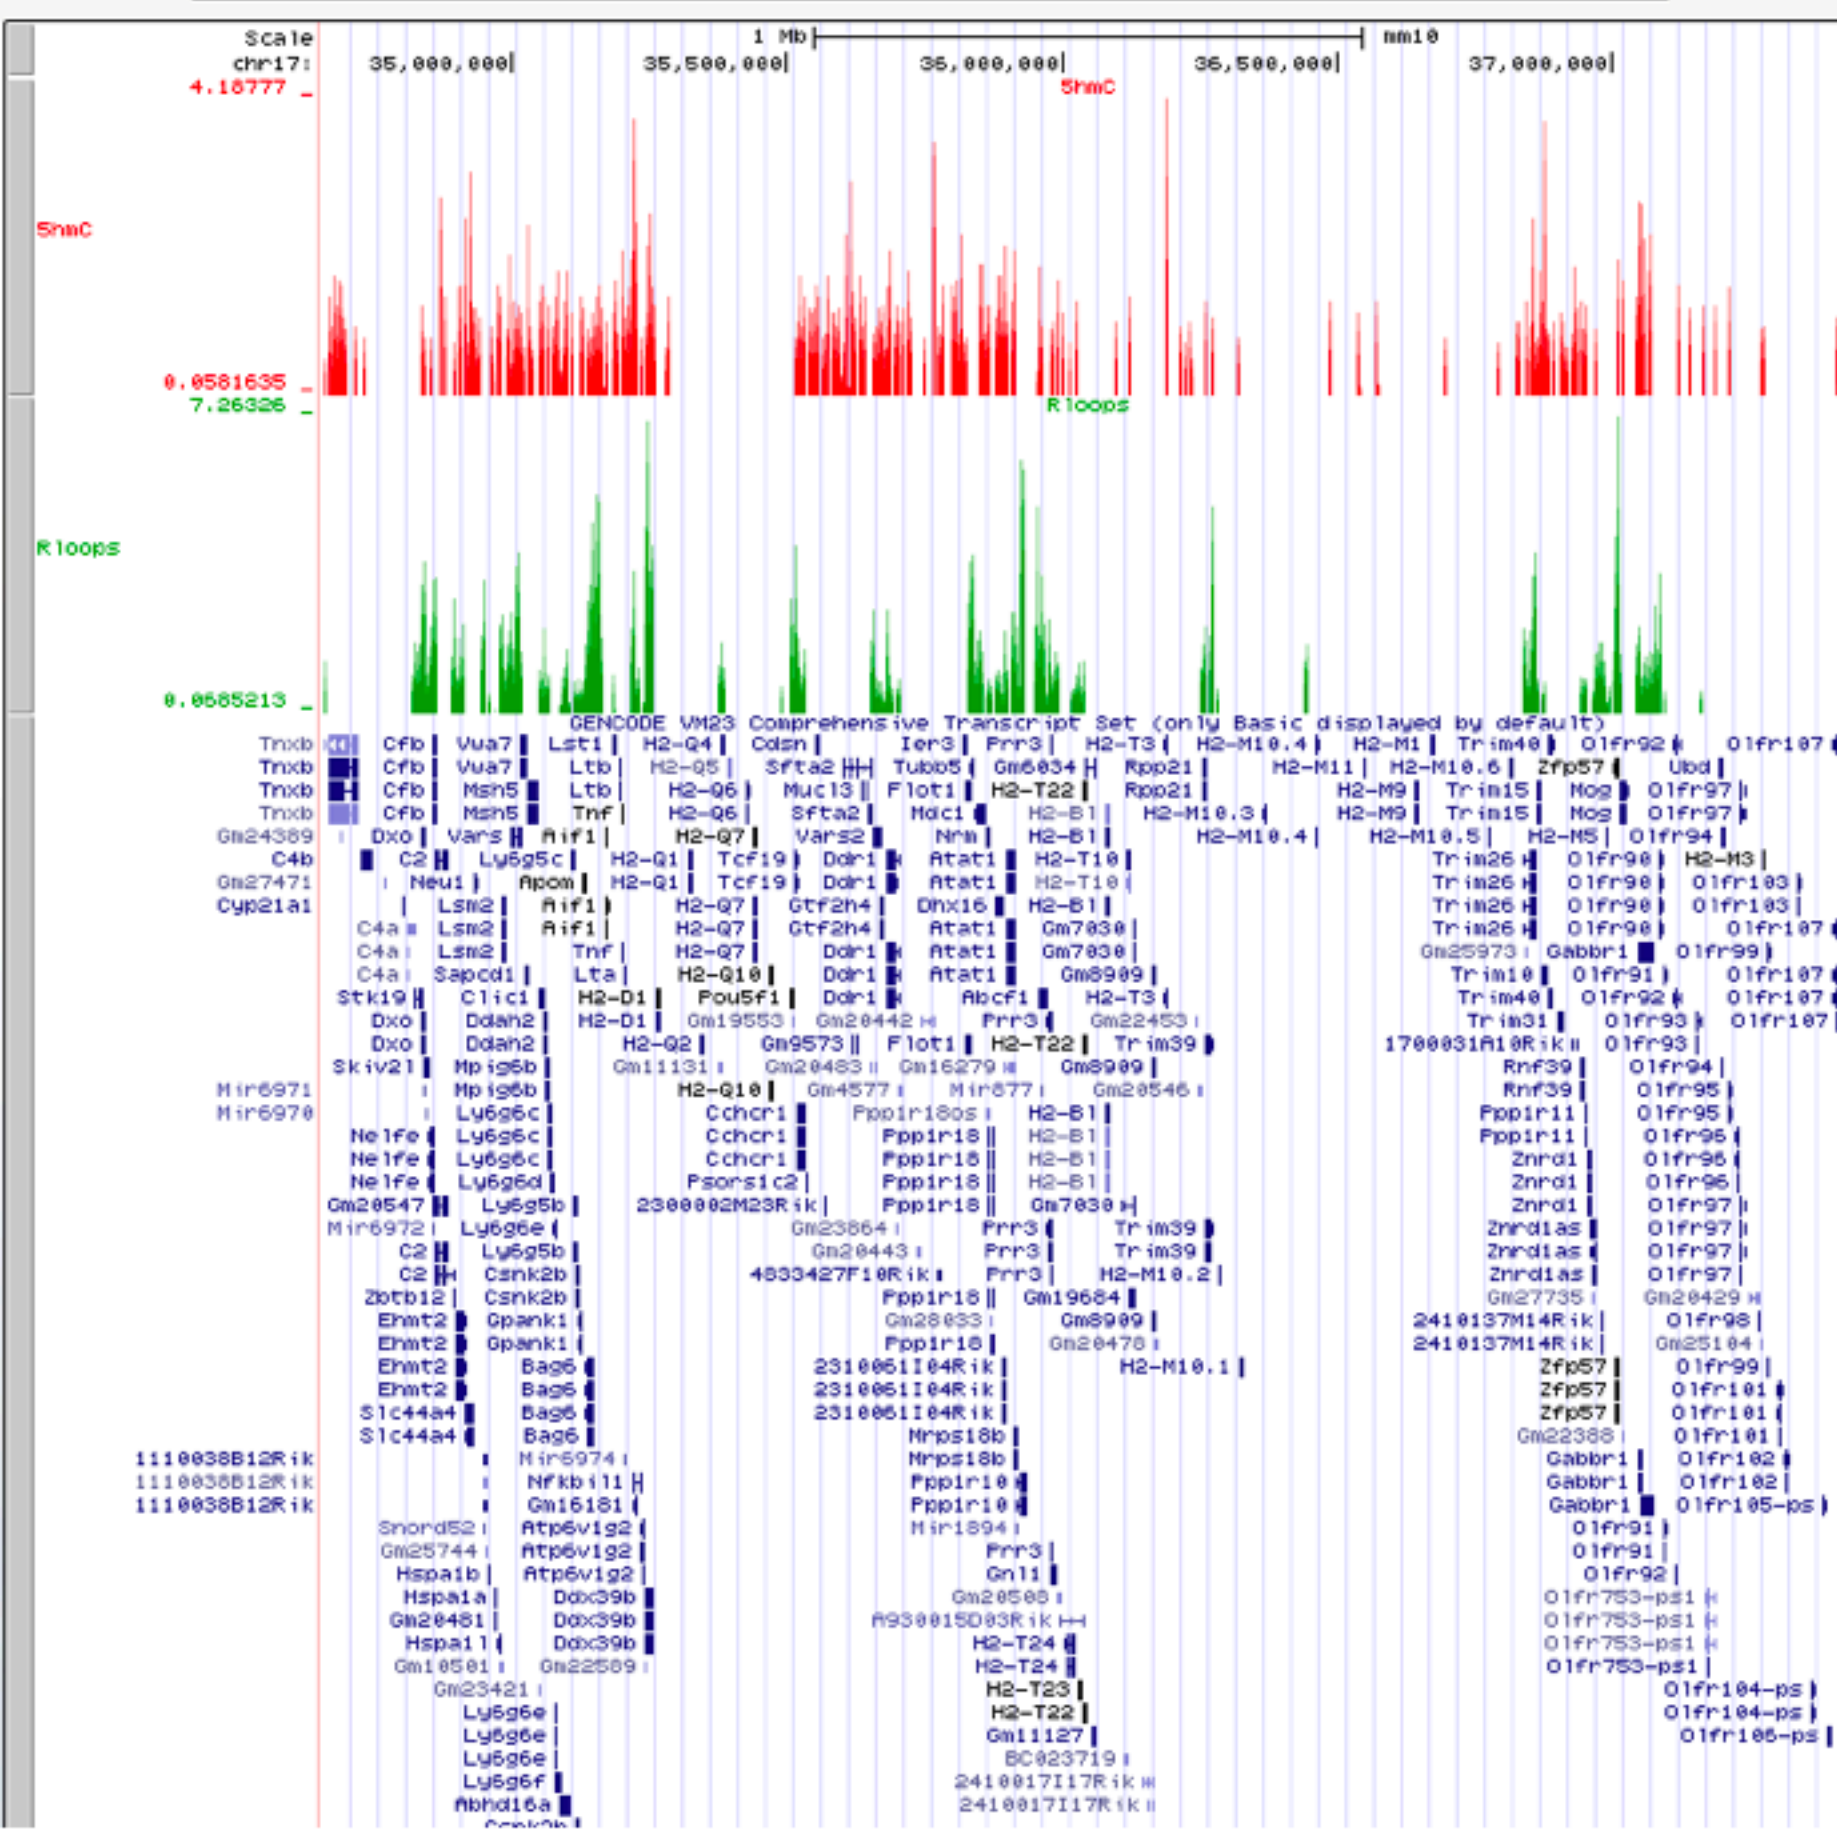

Supplement: supp [file elife-69476-supp-v1.zip]

**A**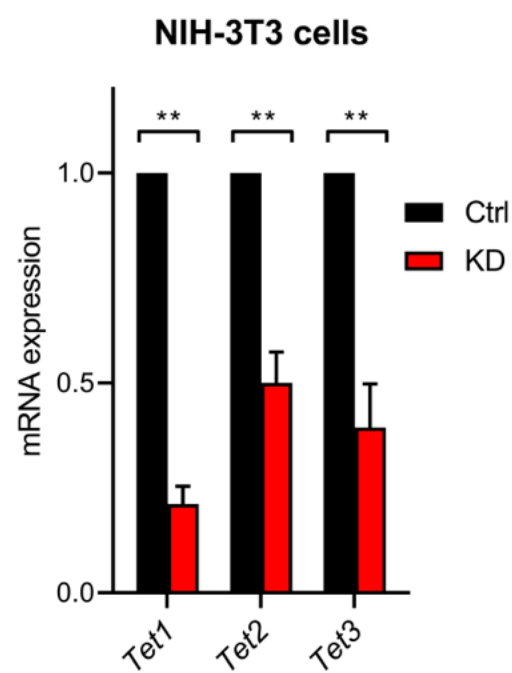**B**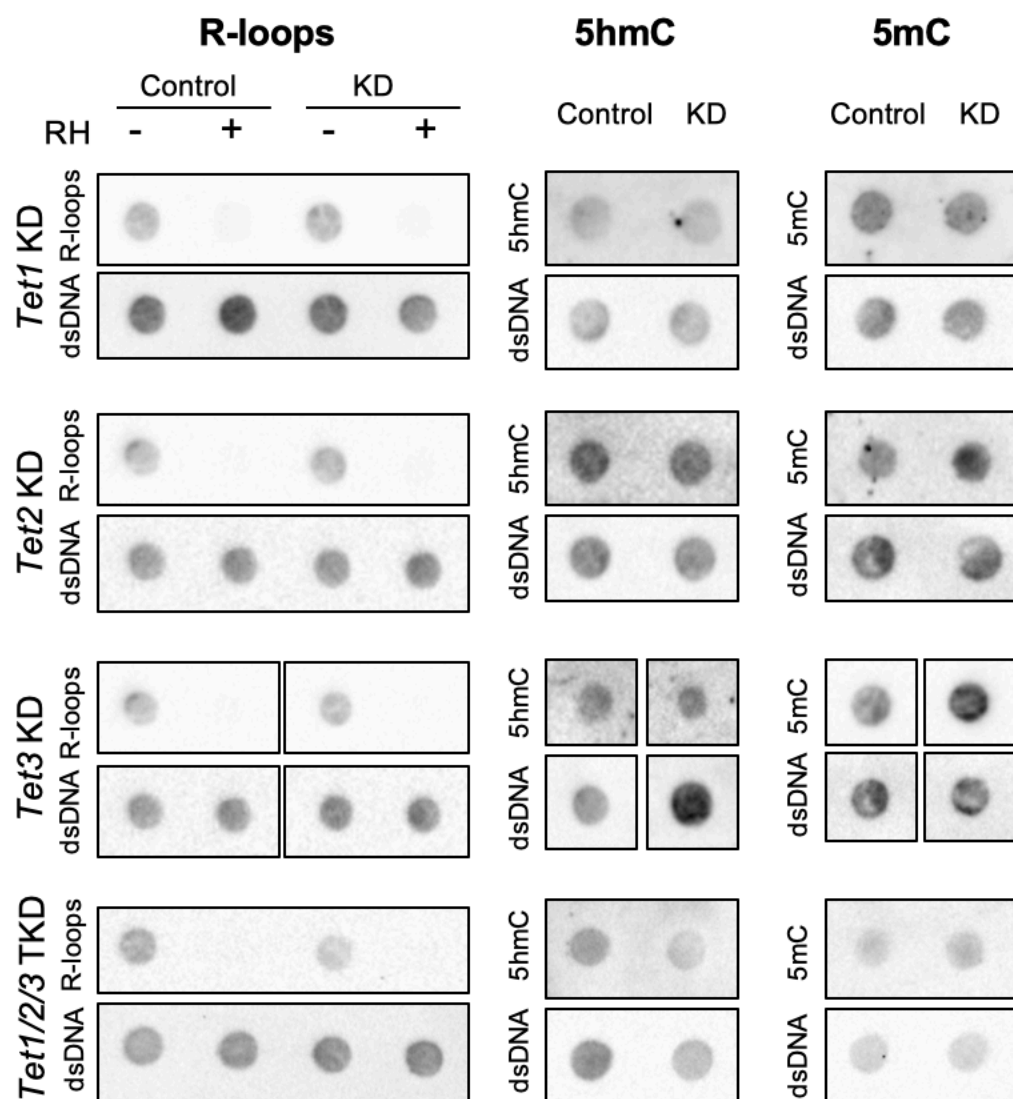**C**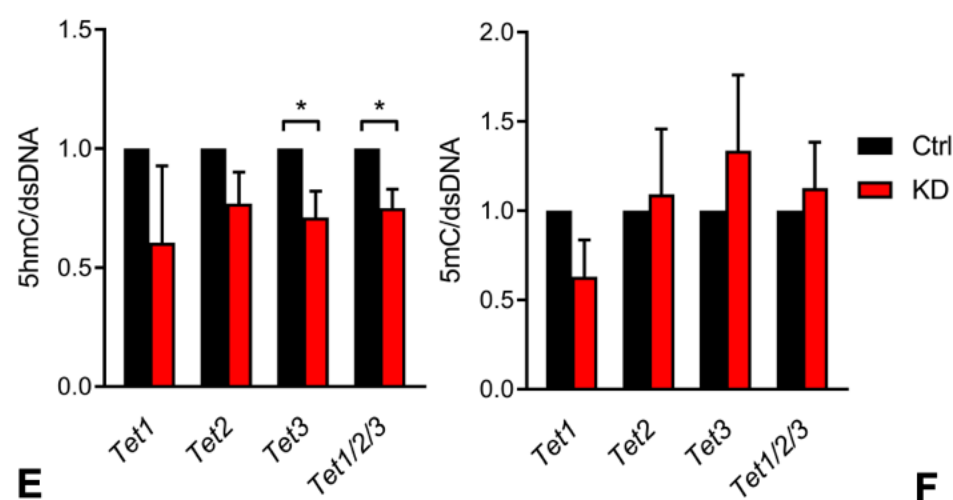**D**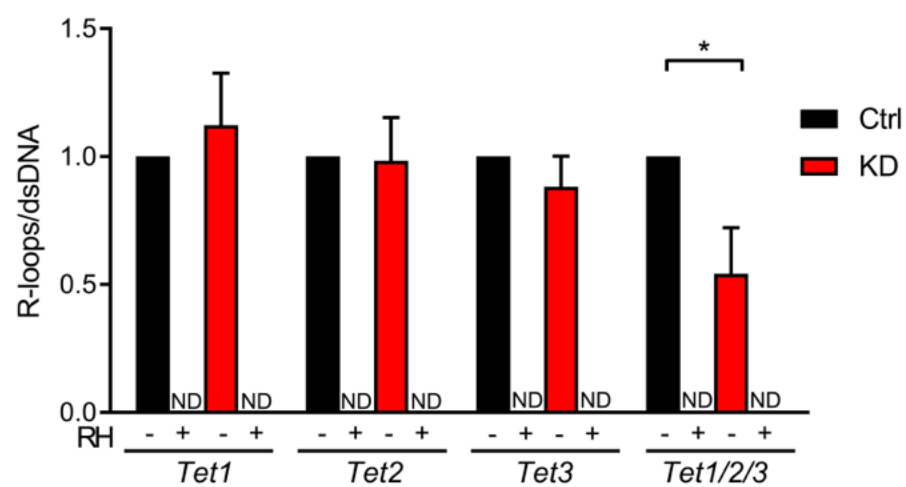**E**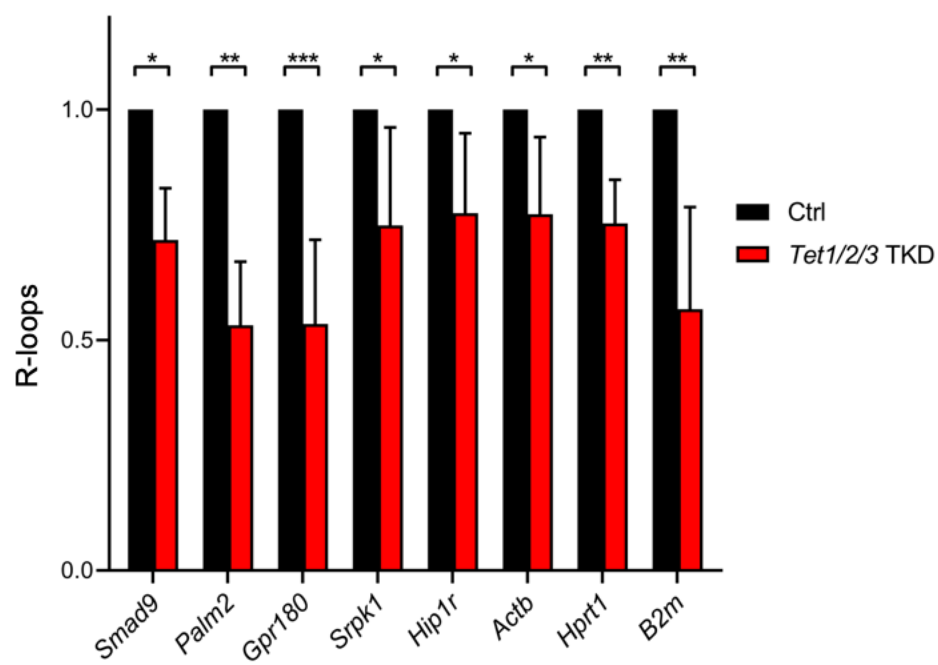**F**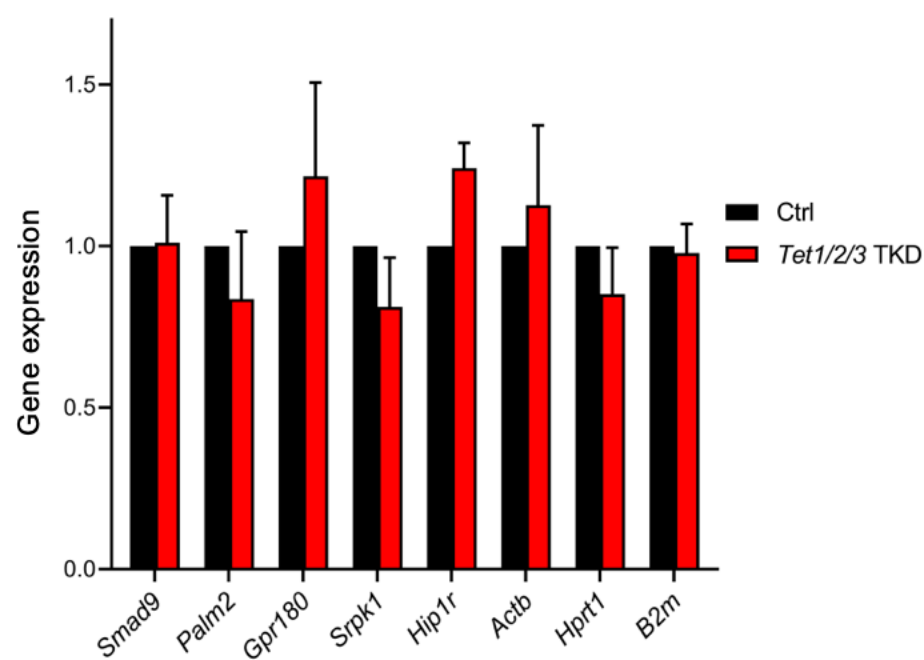

Supplement: supp [file elife-69476-supp-v1.zip]

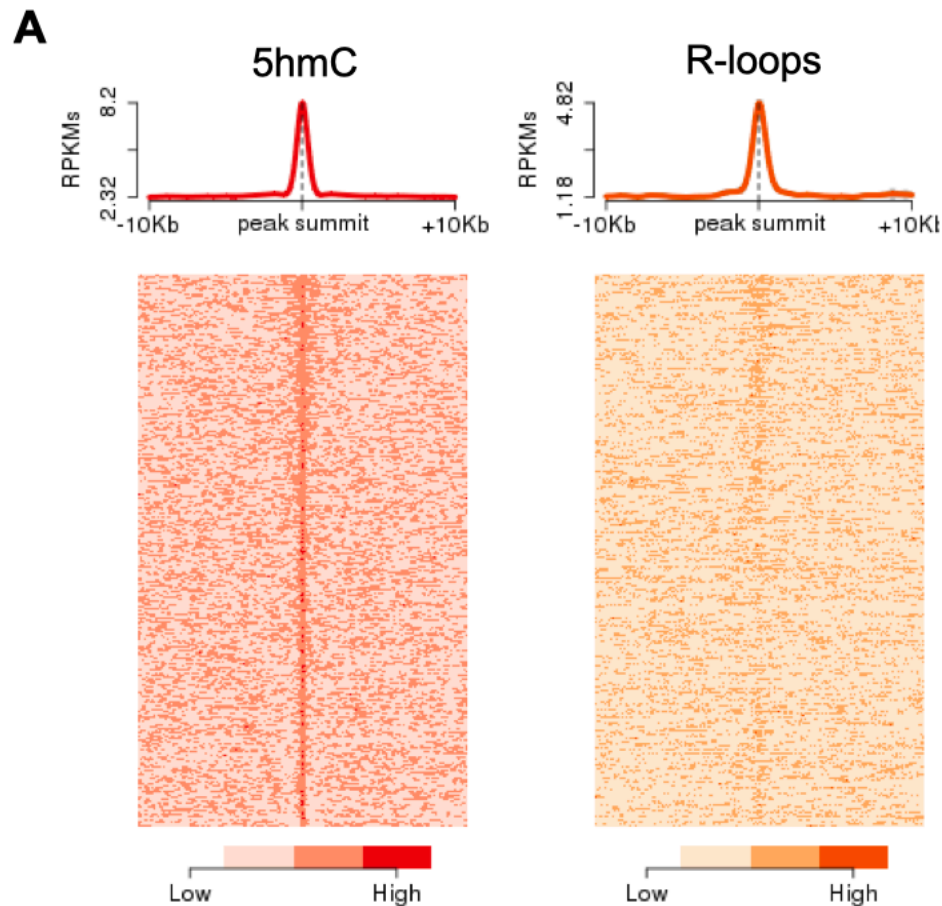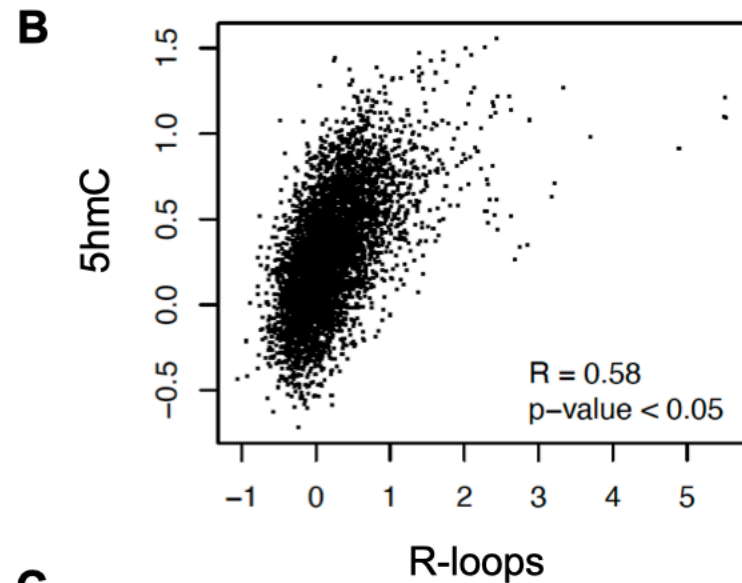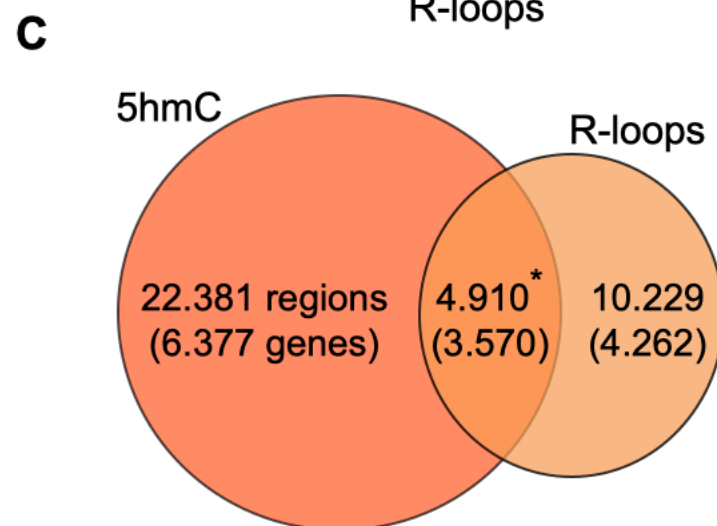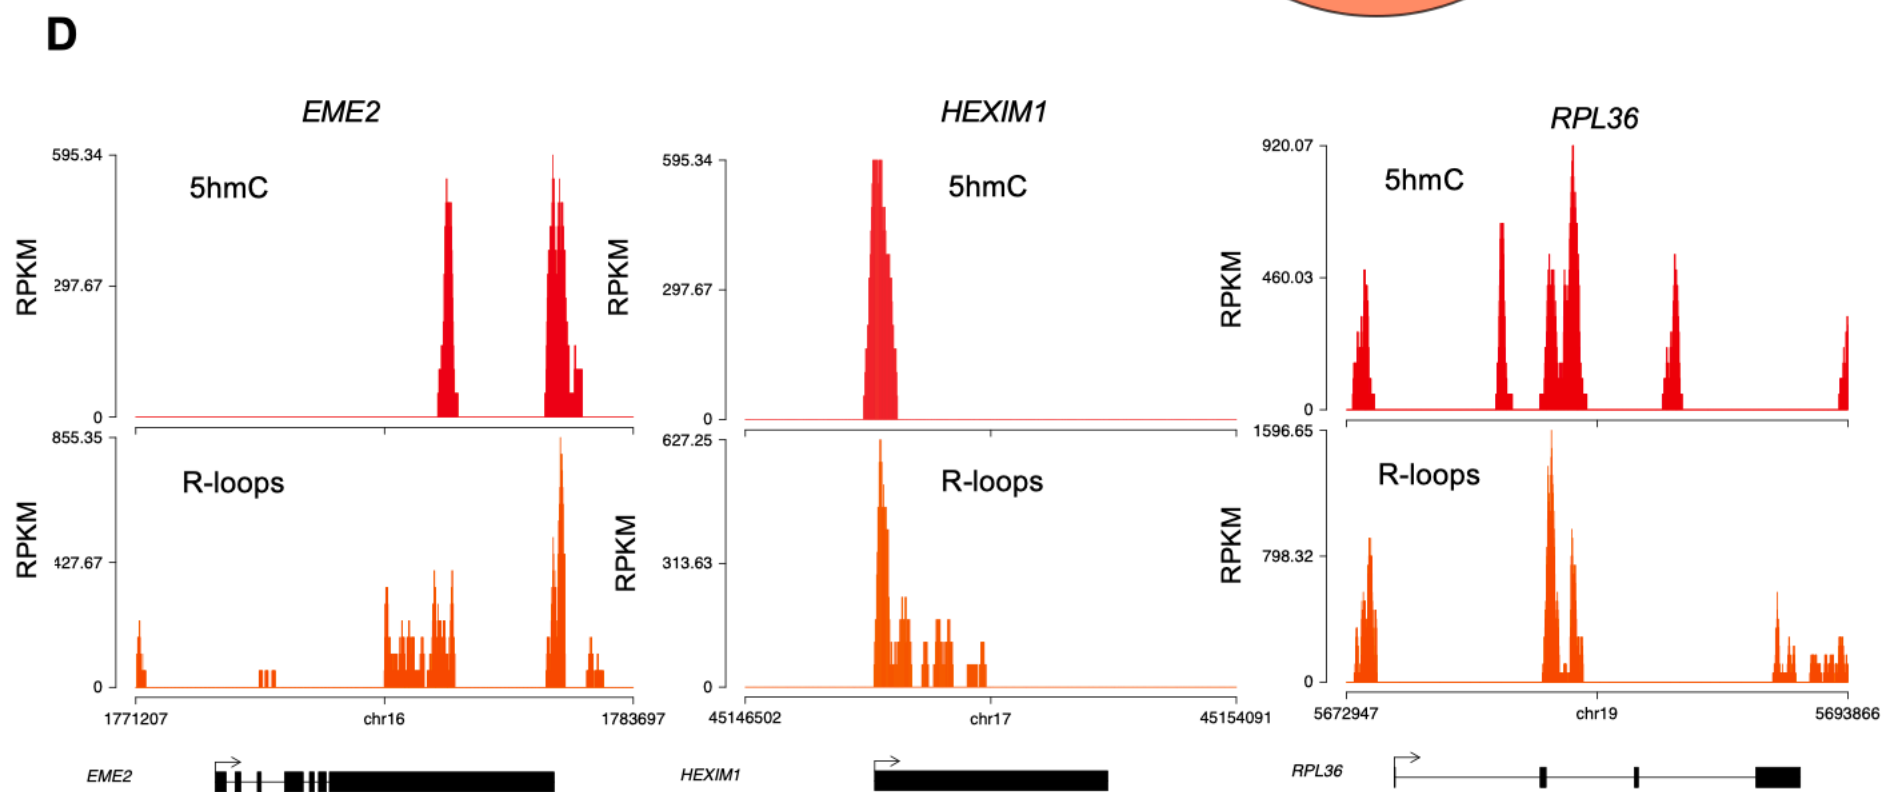

Supplement: supp [file elife-69476-supp-v1.zip]
